# Supplementary material for: Encircling the regions of the pharmacogenomic landscape that determine drug response
Source: Genome Med. 2019 Mar 26;11:17. doi: 10.1186/s13073-019-0626-x (PMC6436215; doi:10.1186/s13073-019-0626-x)
Supplement: Supplementary file 2 — Collection of drug modules in GMT format. The first column indicates the name of the drug while the second column indicates whether the module is a secondary module (“second_module”) or not (“na”). From the third column onwards, there are the genes composing the module (gene names). (XLSX 219 kb) [file 13073_2019_626_MOESM2_ESM.xlsx]

## Sheet: PCM
17-AAG	na	AP2S1	ATG7	B2M	CASP1	CAV1	CMPK1	CTTN	FTH1	FTL	GSN	IL10RB	IL17RC	IL22	IL7	IRF2	KCNN4	LGALS3	MMP2	NFKB1	NR1H2	PLAUR	PTPN12	RNASEL	RXRA	SHC1	SP100	SQSTM1	SYNJ2	TNFRSF1A	TRADD	TXN	WNT5A
5-Fluorouracil	na	ATP5F1D	CCAR1	CCT3	COX5A	CPSF6	EEF1A1	EEF2	EIF3A	EIF3E	EIF3J	EIF3M	EIF4B	EPRS	FAU	GRPEL1	GRPEL2	HNRNPH1	HNRNPK	HSPD1	IARS	IMP3	MDN1	MRPL2	MRPL3	MRPS2	MRRF	MTIF3	NAT10	NDUFS7	NOP14	NOP2	NUP54	PAN3	PCF11	PPA1	PPA2	RACK1	RCL1	RPF1	RPL11	RPL13A	RPL14	RPL15	RPL18	RPL22	RPL23	RPL24	RPL27
5-Fluorouracil	na	ATP5F1D	CCAR1	CCT3	COX5A	CPSF6	EEF1A1	EEF2	EIF3A	EIF3E	EIF3J	EIF3M	EIF4B	EPRS	FAU	GRPEL1	GRPEL2	HNRNPH1	HNRNPK	HSPD1	IARS	IMP3	MDN1	MRPL2	MRPL3	MRPS2	MRRF	MTIF3	NAT10	NDUFS7	NOP14	NOP2	NUP54	PAN3	PCF11	PPA1	PPA2	RACK1	RCL1	RPF1	RPL11	RPL13A	RPL14	RPL15	RPL18	RPL22	RPL23	RPL24	RPL27
5-Fluorouracil_md2	module_2	ACSL5	ALOX12B	ARG2	ASS1	AUH	BAZ2A	BDH1	CBLC	CCND2	CD19	CDK8	CEPT1	CERS6	CHDH	CNKSR1	COPS2	CPT2	CTBP2	DDX21	DGKE	DGKQ	DGKZ	DLST	DSC2	FASLG	FCER1A	FOXK1	GBA2	GOT1	GTF2B	HDAC1	IGF1	IL12B	INO80	IP6K2	JAG2	KDM4A	KDM4C	KRAS	LIAS	LPCAT4	MAP2K7	MED17	MED28	MSL2	MYB	MYC	NOP10
681640	na	ADRB2	ANXA1	ARHGAP29	CAV1	DLL1	DUSP7	EGFR	FHL2	FOSL1	FZD6	IRF1	IRF6	LAMB3	LAMC2	MAPK8	MMP13	MMP14	MSN	MYH9	PCOLCE2	PTAFR	PTHLH	PXN	REL	S1PR5	STAT4	TGFB1I1	TLR2	TRAF3	TRIP10	WNT7A	WNT7B	YWHAZ
ABT-263	na	ABCC8	ACTN2	AKAP9	ANK1	AQP1	ATP2A1	BCL2	CACNA2D2	CACNG2	CAMK2A	CAMK2B	CAV3	CHGA	CHGB	COL2A1	CPLX1	CRMP1	DPYSL5	ESR1	ESRRG	FGF9	GAD2	GAST	GCK	GPD1	GPX6	GRIK3	GSK3A	GSTA2	HDAC9	HMGB1	INSM1	ISL1	KCNA1	KCNB1	KCNC1	KCNH2	KCNH6	KCNH8	LHX3	MED25	MYBPC1	MYF5	MYF6	MYH8	MYL1	MYL4	MYLPF
ABT-869	na	ADAMTS4	AKT1	ATP2B4	BOC	CHPF	CHPF2	COL1A2	COL5A3	COL6A5	COL9A1	CXCL12	DCN	GPC6	GRIA1	GRIA2	GRIK1	ITGA11	LAMB2	LRP1	MAPK11	NOX3	OPRL1	PCOLCE	PDGFRB	PRKG1	S1PR3	SMPD1	TGFB3	UST	XYLT1	ZYX
ABT-869	na	ADAMTS4	AKT1	ATP2B4	BOC	CHPF	CHPF2	COL1A2	COL5A3	COL6A5	COL9A1	CXCL12	DCN	GPC6	GRIA1	GRIA2	GRIK1	ITGA11	LAMB2	LRP1	MAPK11	NOX3	OPRL1	PCOLCE	PDGFRB	PRKG1	S1PR3	SMPD1	TGFB3	UST	XYLT1	ZYX
ABT-869_md2	module_2	ADRA1D	ARHGEF15	CACNA1A	CRH	DGKB	DPYSL4	EPHB4	FIP1L1	HABP4	HIP1	JAM2	LHX2	LIMK1	NKX2-5	NPFF	NPR2	PDGFRA	PLXNA4	PLXND1	RBM5	ROBO1	RSPO2	SH3PXD2B	SHC4	SLC27A1	SMARCD3	SNAPC2	TEAD2	TRRAP
AC220	na	ACO2	ATP5F1A	BGN	CACNA2D1	COL5A3	COL9A1	COX6C	CRAT	DCN	DECR2	DLGAP1	DLGAP3	ETFDH	GRIA1	GRIA2	GRIK1	HADHA	HEY2	KCNS2	LAMC3	NCAN	NDUFA6	NDUFS1	NFASC	NSF	OMD	POLR1A	POLR3H	PPFIA2	PPFIA3	PPP1R1B	PTPA	SAP30	SEC61A2	THBS3	TIMM17A	TIMM21	TLE2	VPS45
AC220	na	ACO2	ATP5F1A	BGN	CACNA2D1	COL5A3	COL9A1	COX6C	CRAT	DCN	DECR2	DLGAP1	DLGAP3	ETFDH	GRIA1	GRIA2	GRIK1	HADHA	HEY2	KCNS2	LAMC3	NCAN	NDUFA6	NDUFS1	NFASC	NSF	OMD	POLR1A	POLR3H	PPFIA2	PPFIA3	PPP1R1B	PTPA	SAP30	SEC61A2	THBS3	TIMM17A	TIMM21	TLE2	VPS45
AC220_md2	module_2	ASB6	CRH	DGKB	KALRN	KIFAP3	MAP2K6	MCHR1	NOX3	NPFF	PDE8B	PIK3R3	PPARGC1A	RAB11FIP3	SOCS6	THRA
AG-014699	na	AP1M1	AP2A2	AP4B1	APH1B	APP	BBS10	BBS9	BCAN	BICD1	CCDC28B	CCR10	CEP63	DNM1	DYNC2H1	NPFF	OPRL1	PAFAH1B1	REEP2	SDC2	TUBA1A	TUBG2
AICAR	na	ARTN	ATF3	BID	BLNK	BRAF	CACNG4	CAMK2G	CASP1	CD9	CDH1	CDH3	CLDN9	CLEC7A	COL17A1	CRB3	CTNND1	DLG1	DLL1	DSC2	DSC3	DSG2	DSP	EFNA1	EGFR	EPHA1	FADD	GAB1	GATA3	IFNLR1	IL15RA	IL20	IL4R	ITCH	ITGA2	ITGA6	ITGB4	ITGB6	IVL	JAG2	JUNB	JUP	KLF4	KLK5	KLK8	KRT1	KRT14	KRT6A	KRT9
AICAR	na	ARTN	ATF3	BID	BLNK	BRAF	CACNG4	CAMK2G	CASP1	CD9	CDH1	CDH3	CLDN9	CLEC7A	COL17A1	CRB3	CTNND1	DLG1	DLL1	DSC2	DSC3	DSG2	DSP	EFNA1	EGFR	EPHA1	FADD	GAB1	GATA3	IFNLR1	IL15RA	IL20	IL4R	ITCH	ITGA2	ITGA6	ITGB4	ITGB6	IVL	JAG2	JUNB	JUP	KLF4	KLK5	KLK8	KRT1	KRT14	KRT6A	KRT9
AICAR_md2	module_2	ABI1	AP1M2	AP3M1	ARHGAP10	CAPN1	CBLC	CTSV	DAPP1	ESR1	FOXO3	FYB1	IFI30	IFIT2	IRF1	IRF6	MAPK8	MMP13	NFKBIA	PSME1	PTAFR	PTK2	PTK2B	REL	SEC24C	SIAH2	TUBA4A	UBE2D1	VAV1
AKTinhibitorVIII	na	ATP2A3	B4GALT1	CRABP2	DERL1	EPN3	ERBB2	FGFR3	FOXA1	INPP5J	MTMR3	ORMDL3	PBX1	PGR	PSENEN	RORC	SDC1	SELENOP	SIAH2	SPTSSB	STIM1
AKTinhibitorVIII	na	ATP2A3	B4GALT1	CRABP2	DERL1	EPN3	ERBB2	FGFR3	FOXA1	INPP5J	MTMR3	ORMDL3	PBX1	PGR	PSENEN	RORC	SDC1	SELENOP	SIAH2	SPTSSB	STIM1
AKTinhibitorVIII_md2	module_2	AKR1C2	ARF6	ARHGEF19	ARHGEF5	CBX4	CXXC5	CYP4B1	DHCR24	ECI1	FGFR1OP	GGPS1	HACD2	MMAA	PEX13	PLA2G12A	PLA2G3	RHOV	SKIL	SRD5A1	SYCE3	SYCP2
AMG-706	na	ACTR1A	AGMO	ASNA1	CAP1	CFL2	COL9A1	CXCL12	DPYSL3	GIT2	GPC6	GRIA1	HARS	ITGA11	MAPK11	MYH9	MYO1C	NTF3	PDGFRB	RARS	RHOC	THY1	WDR1	WNT5B
AP-24534	na	ADAMTS2	ADAMTS3	ADAMTS5	ANGPT1	ATF2	BACE1	CACNA1A	CAPZB	CNN2	COL11A1	COL18A1	COL1A2	COL3A1	COL5A2	COL6A1	COL6A2	COL6A3	CRH	CRHBP	CXCL12	DCN	DGKB	DPYSL2	FGF2	FGF7	FLT3LG	GLI1	GRIA2	GRK5	HABP4	INHBE	ITGA8	ITGB1	ITPKA	JAM2	KLC1	LAMC1	MASP1	MFAP4	MMP2	NPFF	NR2F1	NTNG2	OXTR	PDGFRB	PENK	PFN2	PHF21A
AR-42	na	AR	CHD4	EIF1AX	GNL3	KCNJ3	KLK2	NOP56	POLR3B	PRKCB	PSME4	SHPRH	UBA52	UBE2N	UTP20	WDR3	ZBTB16
AS605240	na	A2M	ABCG5	ABR	ACP5	ACSL3	ADCY2	APOD	APOE	B3GAT1	B4GALT3	B4GALT6	BCAN	CABLES1	CEACAM1	COL9A3	CTNNB1	CTSK	CYP17A1	CYP27A1	CYP7B1	EGR1	ENTPD6	ESRRA	FCER1G	GBA2	GGT7	GLUD2	GPCPD1	HES1	HLA-DPB1	HLA-DRA	HLA-DRB1	IFNGR2	ISG20	ITGA9	KAT2B	LEF1	MBOAT1	MCF2L	MGST2	NAPRT	NEURL2	NFATC2	NPAS2	NR4A1	NR4A2	PRKCD	RAPGEF4
AT-7519	na	AGO2	AGO4	AQP3	BCAS2	BMS1	CCAR1	CCNC	CCND2	CDH1	CDH3	CDKN2B	CLP1	COL17A1	CPT2	CTNND1	DDIT4	DDX20	DDX5	DICER1	DLG3	DLL1	DSC2	DSC3	DSP	GEMIN2	GJB2	GJB6	GRHL1	HES5	HNRNPK	HNRNPM	ISG20L2	JAG2	JUP	KLF4	LAMB3	LAMC2	LIMK2	LIN28A	MAML1	MED17	MED30	MED6	MMACHC	MYO6	NECTIN1	NECTIN4	NOTCH1
AT-7519	na	AGO2	AGO4	AQP3	BCAS2	BMS1	CCAR1	CCNC	CCND2	CDH1	CDH3	CDKN2B	CLP1	COL17A1	CPT2	CTNND1	DDIT4	DDX20	DDX5	DICER1	DLG3	DLL1	DSC2	DSC3	DSP	GEMIN2	GJB2	GJB6	GRHL1	HES5	HNRNPK	HNRNPM	ISG20L2	JAG2	JUP	KLF4	LAMB3	LAMC2	LIMK2	LIN28A	MAML1	MED17	MED30	MED6	MMACHC	MYO6	NECTIN1	NECTIN4	NOTCH1
AT-7519_md2	module_2	CHTOP	CNOT6	CREB1	EIF3E	EIF4A2	EIF5	ESRRA	FAU	GTF2B	HDAC1	KDM5B	KRT14	KRT6A	MAGOH	MRPS31	RCOR1	RPL30	RPL3L	RPL5	RPL8	RPS12	RPS29	SERBP1	TAF2	TTF1
ATRA	na	ADCY9	CREBBP	HDAC5	HEYL	HIPK1	IGF1R	IL6R	KAT7	NKX3-2	NR2E1	P2RY1	PBX1	PHLPP1	PTH	RARA	RXRA	S1PR5	SMAD9	STAT5B	TCF7L1
ATRA	na	ADCY9	CREBBP	HDAC5	HEYL	HIPK1	IGF1R	IL6R	KAT7	NKX3-2	NR2E1	P2RY1	PBX1	PHLPP1	PTH	RARA	RXRA	S1PR5	SMAD9	STAT5B	TCF7L1
ATRA_md2	module_2	CACNG2	GATAD2B	GNB3	GUCA1A	KCNB1	KIF26A	NFASC	OSBPL1A	PDE6H	PREX1	PRKCQ	RGS9BP	RPE65	SEMA6D	TULP1
AUY922	na	ASB1	BBS10	BIRC2	CAV1	CDK9	COL13A1	CSNK2A2	DARS	ETS1	FBXW11	GTF2F2	HSP90AB1	HSPA5	IL1A	MAP3K7	MAP4K4	MMP1	MMP2	NECAP2	NEDD1	NFKB1	NFKBIE	NLRP3	PANX1	PFDN2	RELB	RHOG	SH3KBP1	SHC1	SNRPB2	SNW1	SPHK1	TNFAIP3	TNFRSF1A	TNIP1	TRAF1	TRAF3	TRIO
AUY922	na	ASB1	BBS10	BIRC2	CAV1	CDK9	COL13A1	CSNK2A2	DARS	ETS1	FBXW11	GTF2F2	HSP90AB1	HSPA5	IL1A	MAP3K7	MAP4K4	MMP1	MMP2	NECAP2	NEDD1	NFKB1	NFKBIE	NLRP3	PANX1	PFDN2	RELB	RHOG	SH3KBP1	SHC1	SNRPB2	SNW1	SPHK1	TNFAIP3	TNFRSF1A	TNIP1	TRAF1	TRAF3	TRIO
AUY922_md2	module_2	ADRB2	AK4	AMPD3	APBA3	CHMP7	EIF3G	ETF1	EXOC2	FCF1	FLT3LG	GNPDA2	HMGA1	IL15RA	KLC1	KPNA4	MAPKAP1	POLR3D	POLR3GL	PSMB7	RPL11	RPL35	RPL7L1	RPS12	SMURF2	TRIM5	UBXN1	UCN	WDR19	WDR36
AV-951	na	ALDH8A1	ANGPT1	ANK2	ARSB	BEGAIN	CACNA1A	CCKBR	CRH	CRHBP	DCN	DGKB	DLGAP1	DOK1	EDN3	GNG2	GRIA1	GRIA2	GRIK1	GRP	HGF	ITGA10	ITGA11	KCNS2	KIF5A	KIFAP3	LAMC3	MAPK11	MCHR1	MYL5	NOX3	NPFF	PENK	PLCD4	PLXNA4	PRKG1	RHOC	S1PR3	SHC1	TBXA2R	THBS3	TIAM2	TSPYL2
AZD6244	na	A2M	ABCG5	ABR	ACAA1	ACOT8	ACP5	ACSS1	ALDH1A3	AOC1	AP1S1	APOD	ARAP1	ARAP3	ARHGDIA	ARHGEF11	ARHGEF2	ARPC1B	ARSB	ASPA	ATP13A2	ATP6V0A1	ATP6V0A4	ATP6V0D2	ATP6V1C1	ATP6V1E1	ATP6V1F	ATP6V1H	BCAN	BECN1	CAT	CD63	CD74	CHMP2B	CHPF	CLCN7	CRYL1	CSF3	CST3	CSTB	CTSH	CTSK	CYP17A1	CYP27A1	CYP2U1	CYP3A5	CYP7B1	DEPDC7	DLC1
AZD6244	na	A2M	ABCG5	ABR	ACAA1	ACOT8	ACP5	ACSS1	ALDH1A3	AOC1	AP1S1	APOD	ARAP1	ARAP3	ARHGDIA	ARHGEF11	ARHGEF2	ARPC1B	ARSB	ASPA	ATP13A2	ATP6V0A1	ATP6V0A4	ATP6V0D2	ATP6V1C1	ATP6V1E1	ATP6V1F	ATP6V1H	BCAN	BECN1	CAT	CD63	CD74	CHMP2B	CHPF	CLCN7	CRYL1	CSF3	CST3	CSTB	CTSH	CTSK	CYP17A1	CYP27A1	CYP2U1	CYP3A5	CYP7B1	DEPDC7	DLC1
AZD6244_md2	module_2	ACSBG1	ACSL3	ACTG1	ADCY1	ADCY2	AMPD3	APOE	ASAH1	ATP1A1	ATP1B3	BAX	C3AR1	CASP4	CASP8	CCL20	CCNG1	CD44	CDC16	CDK2	CDK6	CHCHD3	CHCHD6	COL16A1	COL9A3	CSK	CTNNB1	CTTN	CXCL1	DDB2	DECR1	DGKG	DGKI	ENTPD6	ERCC1	FCGR2A	FLT1	FN1	FOXO1	GBA	GMPR	GTF2H1	HBEGF	HEY1	HLA-DRB1	HMGA1	HMOX2	HSPA12A	HSPA6
AZD6244.1	na	ARPC1B	B4GALT5	BAX	BCAN	BECN1	CASP8	CD44	CD63	CHPF	CLCN7	CST3	CSTB	CTNNB1	CTSK	ERBB3	ETS1	ETV4	FCER1G	GAB2	GRN	GSN	HLA-A	HSPG2	IFI35	IFIT3	IKBKB	IL24	IL6R	IRF2	IRS2	ITGA6	ITGA7	ITGA9	ITGB5	LAMA1	LCP2	LGALS3	LGALS3BP	MET	MITF	MMP1	MMP17	MX2	MYO10	NCK2	NEDD4L	NFATC2	PAG1
AZD6482	na	ABLIM3	ACTB	ACTR1A	ADORA1	ANXA6	APP	ARFGAP3	ARSJ	B4GALT7	BET1	BET1L	BIRC3	C3	CAPZA2	CAPZB	CAV1	CD151	CFLAR	CHMP6	CHPF2	CHST15	CXCL12	CXCL5	CXCL8	CYLD	DBNL	DEGS1	DUSP1	ENPEP	EXOC7	FPR1	GMPPA	GPC6	HIPK2	HSBP1	HTR1F	IL15	IL6	ITGA3	ITGB5	ITSN1	JAK1	LMAN1	MATN3	MBTPS1	MITF	MYH9	MYL6
AZD6482	na	ABLIM3	ACTB	ACTR1A	ADORA1	ANXA6	APP	ARFGAP3	ARSJ	B4GALT7	BET1	BET1L	BIRC3	C3	CAPZA2	CAPZB	CAV1	CD151	CFLAR	CHMP6	CHPF2	CHST15	CXCL12	CXCL5	CXCL8	CYLD	DBNL	DEGS1	DUSP1	ENPEP	EXOC7	FPR1	GMPPA	GPC6	HIPK2	HSBP1	HTR1F	IL15	IL6	ITGA3	ITGB5	ITSN1	JAK1	LMAN1	MATN3	MBTPS1	MITF	MYH9	MYL6
AZD6482_md2	module_2	ABCC4	ADAMTS1	ADAMTS3	AP4M1	BICD1	BNIP3L	CADM1	CCL2	CDH6	CETN2	CNDP2	DCAF6	EDEM2	EEA1	FGF2	FN1	FOSL2	GDF5	GFRA1	GLS	HSPB8	KCNIP1	LDHA	LIPC	LPCAT1	LRRFIP1	MAN1B1	MAN2B1	MAPKAPK2	MMP2	MYBL1	NEK6	NF2	NR3C1	P4HA2	P4HA3	P4HB	PDAP1	PFKFB3	PGM3	POFUT2	POLH	POLI	PRDX4	PRPS1	RAB9A	RAB9B	RBKS
AZD6482.1	na	ACTB	ACTN4	ACTR1A	AMPH	ANXA6	AP2S1	ARF4	ARFGAP1	ARFGAP3	ARHGAP1	ARHGAP22	ARHGAP29	ARHGEF17	ARHGEF6	B4GALT7	BET1L	CAPZB	CFL1	COPB2	CTGF	DBNL	FGF7	GPC6	HSPG2	IGFBP3	ITGB5	KDELR3	LAMB2	LIMK1	MRTFA	MYH9	MYL6	NDST1	NF2	PAPSS2	PDGFRB	PIK3CD	RHOC	RHOQ	RRAS	SCYL1	SDC2	SEC24A	SEC24D	SEC31A	SFRP2	SLC26A2	SLC35B3
AZD6482.1	na	ACTB	ACTN4	ACTR1A	AMPH	ANXA6	AP2S1	ARF4	ARFGAP1	ARFGAP3	ARHGAP1	ARHGAP22	ARHGAP29	ARHGEF17	ARHGEF6	B4GALT7	BET1L	CAPZB	CFL1	COPB2	CTGF	DBNL	FGF7	GPC6	HSPG2	IGFBP3	ITGB5	KDELR3	LAMB2	LIMK1	MRTFA	MYH9	MYL6	NDST1	NF2	PAPSS2	PDGFRB	PIK3CD	RHOC	RHOQ	RRAS	SCYL1	SDC2	SEC24A	SEC24D	SEC31A	SFRP2	SLC26A2	SLC35B3
AZD6482.1_md2	module_2	ADORA1	ANPEP	ATP6AP2	BCL6	BLVRA	CADM1	CALR	CCL2	CDH2	CDH6	CFI	CXCL12	CYLD	DGKI	DPYSL3	ECE1	EDN1	FAH	FGF2	FN1	GFRA1	GOPC	GUCY1B1	GUK1	HDAC7	ICAM1	IGFBP5	IL12A	IL4I1	IL6	IMPDH1	ITGB1	KIRREL3	MAN1B1	MMP2	NEK6	NFIC	NFIX	P4HA2	P4HA3	P4HB	PLA2G15	PLXNA3	PRPS1	S1PR3	SAP30	SEPT7	SERPINE1
AZD7762	na	ABCC1	CSNK2A2	DR1	GAPDH	GLI1	GLS	GSTP1	HAUS6	HAUS8	HHIP	KLHL21	LDHA	LDHB	MAPK12	MMP2	MS4A2	NRG1	PDGFA	PFKP	POLR2F	RUNX3	TAF6	TPI1	YES1
AZD7762	na	ABCC1	CSNK2A2	DR1	GAPDH	GLI1	GLS	GSTP1	HAUS6	HAUS8	HHIP	KLHL21	LDHA	LDHB	MAPK12	MMP2	MS4A2	NRG1	PDGFA	PFKP	POLR2F	RUNX3	TAF6	TPI1	YES1
AZD7762_md2	module_2	ADAMTS5	CBR1	EXOSC9	FMNL1	ITM2B	KIF14	NOL9	ORC1	PLEKHA1	RECQL	SPOCK3
Afatinib	na	AGPAT2	ALOX12	ALOX12B	CACNG4	CASP1	CASP4	CBLC	CD9	CDH1	CDH24	CDH3	CDS1	CERS6	CISH	CLDN1	CLDN9	COL17A1	COL28A1	CRB3	CTNND1	CTTN	DGKA	DGKH	DLG3	DLL1	DSC2	DSC3	DSG2	DSP	EFNA1	EGFR	EPHA1	EPHB4	ERBB2	EVPL	F3	FOS	GRB7	HES1	HES5	HPSE	IL18	ITCH	ITGA2	ITGA6	ITGB4	ITGB6	IVL
Afatinib	na	AGPAT2	ALOX12	ALOX12B	CACNG4	CASP1	CASP4	CBLC	CD9	CDH1	CDH24	CDH3	CDS1	CERS6	CISH	CLDN1	CLDN9	COL17A1	COL28A1	CRB3	CTNND1	CTTN	DGKA	DGKH	DLG3	DLL1	DSC2	DSC3	DSG2	DSP	EFNA1	EGFR	EPHA1	EPHB4	ERBB2	EVPL	F3	FOS	GRB7	HES1	HES5	HPSE	IL18	ITCH	ITGA2	ITGA6	ITGB4	ITGB6	IVL
Afatinib_md2	module_2	ABI1	ACVR1B	ADAR	ADH7	ADRB2	AHR	ALDH3A1	ALDH3B2	BAIAP2	BLNK	BMP7	CALB1	CALML5	CAMK2G	CASP10	CCND1	CLEC7A	COL4A6	CTSV	CYP1A1	CYP24A1	CYP2S1	DAPP1	DUSP7	EGR1	ESRRA	EZR	FADD	GPX2	IFI30	IFNB1	IFNGR1	IFNLR1	IL4R	INHBB	IRF1	IRF5	IRF6	ITPR3	KLF4	KTN1	LYN	MAPK13	MED1	MED24	MED30	MED6	NCF2
Afatinib_rescreen_	na	ADAR	AGPAT2	AKAP13	ALOX5	APLP2	ARAP1	ARHGAP1	ARHGAP32	ARHGDIB	ARHGEF16	ARHGEF4	CACNG4	CARD11	CARMIL1	CASP10	CD2AP	CDH1	CDH24	CDH3	CDS1	CERS6	CGN	CISH	CLDN1	CLDN16	CLDN9	CLEC7A	COL17A1	COL28A1	COL4A6	CRB3	CTNND1	CTSV	CTTN	DDX58	DGKA	DGKH	DLG3	DLL1	DNAJB1	DNAJC5	DSC2	DSC3	DSG2	DSP	DTX2	DTX4	EFNA1
Afatinib_rescreen_	na	ADAR	AGPAT2	AKAP13	ALOX5	APLP2	ARAP1	ARHGAP1	ARHGAP32	ARHGDIB	ARHGEF16	ARHGEF4	CACNG4	CARD11	CARMIL1	CASP10	CD2AP	CDH1	CDH24	CDH3	CDS1	CERS6	CGN	CISH	CLDN1	CLDN16	CLDN9	CLEC7A	COL17A1	COL28A1	COL4A6	CRB3	CTNND1	CTSV	CTTN	DDX58	DGKA	DGKH	DLG3	DLL1	DNAJB1	DNAJC5	DSC2	DSC3	DSG2	DSP	DTX2	DTX4	EFNA1
Afatinib_rescreen__md2	module_2	ADCY7	ADRB2	B3GNT2	B3GNT3	B3GNT4	B3GNT5	B3GNT7	B4GALNT2	B4GALT1	CHADL	EDN1	EZR	FUT1	FUT2	FUT3	GALNT12	GALNT14	GALNT18	GALNT3	GALNT6	GALNT7	GCNT1	GCNT3	LGR4	LRG1	LRRC57	LRRC8A	LRRC8E	MUC4	MUC5B	MUCL1	SLC9A3R1	ST6GALNAC2	SYNE2	TPBG	TSKU
Axitinib	na	B4GALNT1	BTRC	CACNA2D2	COL1A2	COL23A1	COL3A1	COL6A3	CXCL12	DCN	FGFR2	FZD8	GALNT8	GCG	GLI1	GRIA1	ITGA11	KIF26A	KIF5A	MAPK11	MAPK12	MC5R	MFAP4	NKX2-5	PAFAH1B1	PRKG1	REEP2	TBX5	TCF12	TCF7L1	UBE2G1	WNT5B
BAY61-3606	na	CSNK2A1	GAR1	GMPR2	GTPBP4	IMPDH2	MPI	MTA1	NOB1	NOC3L	NOL6	PDCD11	POLR1B	POLR3D	PPAT	PPP2R2A	RPL13A	RPL22L1	RPL34	RPL4	RPL9	RPL9P7	RPL9P8	RPL9P9	RPLP1	RPS12	RPS18	RPS6	SDAD1	UTP3
BMN-673	na	AHCYL1	AKT3	ALDH1L2	ALDH7A1	ARHGEF25	BBS2	CAV1	CBS	CCT7	CCT8	CEP290	CEP78	CH25H	CRK	CWC22	CXCL2	DEGS1	DNAJC8	ESD	EXOSC9	FAS	FER	GNAI3	GNB4	GNB5	GNPDA2	GTF2F2	HTR1F	IL2RB	IL7	ITGA4	JAK2	LDHB	MAT2B	MDM4	MTREX	MYH10	NDEL1	NFKB2	ORMDL1	PFDN2	PIK3CG	PLRG1	PRDX6	PRKACB	PRKCE	PRKDC	PROK2
BMN-673	na	AHCYL1	AKT3	ALDH1L2	ALDH7A1	ARHGEF25	BBS2	CAV1	CBS	CCT7	CCT8	CEP290	CEP78	CH25H	CRK	CWC22	CXCL2	DEGS1	DNAJC8	ESD	EXOSC9	FAS	FER	GNAI3	GNB4	GNB5	GNPDA2	GTF2F2	HTR1F	IL2RB	IL7	ITGA4	JAK2	LDHB	MAT2B	MDM4	MTREX	MYH10	NDEL1	NFKB2	ORMDL1	PFDN2	PIK3CG	PLRG1	PRDX6	PRKACB	PRKCE	PRKDC	PROK2
BMN-673_md2	module_2	ABI2	ABL1	ACTR2	ADARB1	AK3	CAPZA1	CHD3	CHD9	CHN1	CTGF	HOXA2	IGF2BP1	ITGB1	MOV10	NCKAP1L	NTNG1	PHF21A	PKN3	PPP3CB	PSMB6	RNF2	SALL4	SLIT2	SMAD5	SMARCD3	TAF1A	TAF1B	TCF12	TCF4	VCL	WASF1	WASF3
BMS-345541	na	AGO4	BMS1	CCAR1	CCND2	EIF3J	HDAC1	HNRNPK	IMP3	JAG2	KRI1	MRPS5	MYC	NAE1	NCL	NOTCH1	PCF11	RCL1	RCOR1	REL	RNF2	RPS12	RPS28	RPS29	RPS4X	TCEA1	UBA52	UBE2D3	WDR43
BMS-536924	na	ANAPC16	BMP2	CACNA2D2	COL2A1	COX5A	CPSF3	CREBBP	CUL3	EIF4B	EP300	F5	FOXO1	HYKK	IGF2	IL18	IL4R	IMP3	KLF5	MAP2K6	MED28	MYL4	NACA	NEB	NOS1	PCBP1	PCBP2	PCF11	PRKX	PSMA4	PTCD3	RACK1	RANBP2	RBBP6	RPL13	RPL13A	RPL15	RPL22	RPL27	RPLP1	RPS23	RPS29	RSL24D1	SEC11A	SUMO1	TTN
BMS-536924	na	ANAPC16	BMP2	CACNA2D2	COL2A1	COX5A	CPSF3	CREBBP	CUL3	EIF4B	EP300	F5	FOXO1	HYKK	IGF2	IL18	IL4R	IMP3	KLF5	MAP2K6	MED28	MYL4	NACA	NEB	NOS1	PCBP1	PCBP2	PCF11	PRKX	PSMA4	PTCD3	RACK1	RANBP2	RBBP6	RPL13	RPL13A	RPL15	RPL22	RPL27	RPLP1	RPS23	RPS29	RSL24D1	SEC11A	SUMO1	TTN
BMS-536924_md2	module_2	AHCY	CYP2S1	CYP3A5	CYP4F3	ENO3	FDX1	LIAS	LPGAT1	LRPPRC	PECR	PNPLA4	SULT1E1	TST
BMS-708163	na	ACTN4	BCL2L1	CFLAR	COL18A1	EDN1	EDN2	IFNAR1	ITGA3	ITGB2	ITGB8	KIF3B	MAP3K1	MYL6	MYLK	OXTR	SDC4	SPTAN1	UBC
BMS-754807	na	ACVR2B	AKAP13	AQR	ARHGAP26	CLTA	CREBBP	EEF2	EIF4B	GLCE	HNRNPK	HS6ST2	IGF1R	IGF2	IHH	IMP3	IRS2	KANSL1	KAT2A	KLF4	LRP5	MAML1	MED13	MED28	MYOG	PAN3	PUM1	RPL22	SNRPA1	SYF2	TNNI1
BX-795	na	ACTR1A	AKT3	ALCAM	ANGPT1	ANXA1	AP2A2	ARHGEF25	B4GALT2	BACE1	BDNF	CACNA1A	CACNA2D4	CCL2	CEP63	CH25H	CHN1	COL12A1	COL13A1	COL1A1	COL1A2	COL3A1	COL4A6	COL8A1	CXCL12	CYBRD1	DCN	DNM1	EDNRA	EPHA5	EPHB2	EXOC2	F2R	F2RL2	FGF1	FGF2	FN1	FPR1	GAS6	GCG	GNA12	GNAI3	GNG11	HRH1	HTR1F	INHBE	ITGA1	ITGA11	ITGAV
BX-912	na	ARID1B	ARID2	CCAR1	CCND2	CREB1	ELAVL1	ERCC8	GCG	GLMN	HDAC2	HNRNPA0	HNRNPDL	HNRNPH1	HNRNPK	HNRNPM	HNRNPR	KIF2A	KPNB1	LUC7L3	MAGOH	NUP188	OLA1	PDS5B	PHF21A	PLRG1	PRPF38A	PRPF40A	RAD17	RANBP2	RBMX	RSF1	SF3A3	SIRT1	SMARCA5	SMARCE1	SMC6	SRSF11	STAG1	SUGP1	SUMO1	TCF12	TCF4	THRAP3	TOP2B	TOPORS	U2AF1	UPF3B	USP33
BX-912	na	ARID1B	ARID2	CCAR1	CCND2	CREB1	ELAVL1	ERCC8	GCG	GLMN	HDAC2	HNRNPA0	HNRNPDL	HNRNPH1	HNRNPK	HNRNPM	HNRNPR	KIF2A	KPNB1	LUC7L3	MAGOH	NUP188	OLA1	PDS5B	PHF21A	PLRG1	PRPF38A	PRPF40A	RAD17	RANBP2	RBMX	RSF1	SF3A3	SIRT1	SMARCA5	SMARCE1	SMC6	SRSF11	STAG1	SUGP1	SUMO1	TCF12	TCF4	THRAP3	TOP2B	TOPORS	U2AF1	UPF3B	USP33
BX-912_md2	module_2	ABL1	AGO3	ALMS1	CAV3	CEP162	COL11A1	COL3A1	COL8A2	DCN	DKK2	DLG2	DLGAP1	DLX5	EFNB3	EPHA7	EXOSC9	FGF20	FGF9	FGFR1	FZD8	GLI1	GPC2	GRIA2	GRIK1	HGF	HS3ST4	KCNAB3	KCNH2	KCNJ2	KCNMB2	KERA	KIF1A	KIF5A	MEIS1	NDST3	NDST4	NINL	OGN	PCM1	PDGFRA	PRKG1	PTPRC	RBFOX1	SH3GL3	SHC2	SMAD1	TNRC6B	TUBB2B
Bicalutamide.1	na	BIRC2	CXCL5	FPR1	FPR2	GOPC	GREM2	LHCGR	RGS18	TNFSF11	TRAF2
Bleomycin	na	CARS	CCT7	CSNK2A1	CSNK2A2	DDX21	DIMT1	DIS3	DNAJC7	EEF1A1	EEF1D	EIF1	EIF3A	EIF3D	EIF3E	EXOSC1	EXOSC9	HMGA1	HSP90AB1	HSPA9	IARS	KARS	KCTD19	LTV1	LYAR	NOB1	NOC3L	PDCD11	PHB2	POLG2	POLR2B	PUM3	RPF2	RPL13A	RPL24	RPL31	RPL37	RPL5	RPL8	RPS18	RPS6	RRP12	RSL24D1	SARS2	SDAD1	TAF1D	TAF4B	TCEA1	TWNK
Bleomycin	na	CARS	CCT7	CSNK2A1	CSNK2A2	DDX21	DIMT1	DIS3	DNAJC7	EEF1A1	EEF1D	EIF1	EIF3A	EIF3D	EIF3E	EXOSC1	EXOSC9	HMGA1	HSP90AB1	HSPA9	IARS	KARS	KCTD19	LTV1	LYAR	NOB1	NOC3L	PDCD11	PHB2	POLG2	POLR2B	PUM3	RPF2	RPL13A	RPL24	RPL31	RPL37	RPL5	RPL8	RPS18	RPS6	RRP12	RSL24D1	SARS2	SDAD1	TAF1D	TAF4B	TCEA1	TWNK
Bleomycin_md2	module_2	ATF1	ATF4	IRAK2	MAP3K7	NFKB2	NFKBIE	RELB	RIPK2	TNFRSF10A	TNFRSF10B	TNFRSF10D	TNFSF9	TRAF3	TRIB3	TRIM25
Bleomycin_50uM_	na	ABL1	ADAM17	ADK	ADM	ADORA2B	ADRB2	AMOTL1	AMOTL2	AMPD3	ANPEP	ANXA1	ANXA2	ARHGAP10	ARHGAP24	ARHGAP29	ARHGEF18	BBS10	BBS2	BCAS2	BDNF	BIRC2	BIRC3	BMS1	BSG	BTRC	C3	CAPN2	CASP1	CASP4	CAST	CCNH	CD40	CD44	CDC27	CDC37L1	CDC42EP3	CDK6	CDK7	CDK9	COL12A1	COL13A1	COL16A1	COL4A6	COPS2	COPS3	CRK	CSNK1A1	CSNK2A2
Bleomycin_50uM_	na	ABL1	ADAM17	ADK	ADM	ADORA2B	ADRB2	AMOTL1	AMOTL2	AMPD3	ANPEP	ANXA1	ANXA2	ARHGAP10	ARHGAP24	ARHGAP29	ARHGEF18	BBS10	BBS2	BCAS2	BDNF	BIRC2	BIRC3	BMS1	BSG	BTRC	C3	CAPN2	CASP1	CASP4	CAST	CCNH	CD40	CD44	CDC27	CDC37L1	CDC42EP3	CDK6	CDK7	CDK9	COL12A1	COL13A1	COL16A1	COL4A6	COPS2	COPS3	CRK	CSNK1A1	CSNK2A2
Bleomycin_50uM__md2	module_2	AEBP2	AGO3	AKT3	AP2A2	AP3S1	BDKRB1	CBL	CEBPB	CEBPD	CEP290	CEP63	CLTA	COPB1	CSF2	CXCL8	DEGS1	DERL2	DGKA	DKK1	DST	DUSP1	EEF1A1	EIF2S1	EIF3A	EIF3I	EIF3M	EIF5A2	ERBIN	ETF1	FABP4	FHL2	FKBP1B	FOXK1	GFM2	GNAI1	GNB4	GNPDA1	HAUS1	HAUS2	HERC5	HEXB	HSPA4	HSPA5	ICAM1	IGF2BP1	JAK1	JAK2	KDSR
Bosutinib	na	ACKR3	ADAM17	ADORA2B	ADRB2	ALCAM	ANXA1	ANXA2	ARAP1	ARHGEF18	ARHGEF4	BTRC	CAPN1	CASP1	CASP4	CAST	CAV1	CD44	CDK7	CDK9	CLDN1	COL17A1	COL27A1	COL4A1	COL4A5	COL4A6	COL7A1	DAB2IP	DAPP1	DGKA	DGKH	DLL1	DSC3	DSG2	EGFR	FADD	FBXO27	GJB2	GJB6	GTF2F2	HES5	HPSE	IL18	IRF1	IRF5	IRF6	ITGA2	ITGA3	ITGA6
Bosutinib	na	ACKR3	ADAM17	ADORA2B	ADRB2	ALCAM	ANXA1	ANXA2	ARAP1	ARHGEF18	ARHGEF4	BTRC	CAPN1	CASP1	CASP4	CAST	CAV1	CD44	CDK7	CDK9	CLDN1	COL17A1	COL27A1	COL4A1	COL4A5	COL4A6	COL7A1	DAB2IP	DAPP1	DGKA	DGKH	DLL1	DSC3	DSG2	EGFR	FADD	FBXO27	GJB2	GJB6	GTF2F2	HES5	HPSE	IL18	IRF1	IRF5	IRF6	ITGA2	ITGA3	ITGA6
Bosutinib_md2	module_2	ARHGEF28	CAPN14	CEBPD	CYP1A1	FABP4	FHL2	FZD6	GPC1	GSTP1	IL1RN	IL4R	JUNB	KDSR	KLF5	LTBR	MMP10	MMP13	NCF2	NCOA3	OLR1	PDGFA	PI4K2A	PTPRF	PTPRZ1	RAC1	RXRA	S100A8	S100A9	SPTLC1	TLL1	TNFSF9	USP43	VPS26A	VPS4B	WNT10A	WNT4	WNT7A	WNT7B	XDH
CAL-101	na	CCL11	CNDP2	EDN2	GLYATL1	GUCA1C	GUCY1B1	IL12B	ITGB8	KLK3	PDE6A	TUBA4A	UGT2B17
CCT007093	na	ARHGEF17	CAPN1	CLU	EFNA1	EGFR	ERBB2	EYA2	KCTD1	LAMA5	NCOA3	NDST1	PBX1	PGR	RAC1	RHOV	RXRA	S100A8	S100A9	SDC1	TFAP2C	TGFB3	THRB	VAV3	WNT4	WNT7B
CCT018159	na	ADAM17	AIP	ATF4	BTRC	CDK9	COL13A1	COL4A6	CRK	DUSP7	EGFR	EIF2S1	EIF3D	EIF3E	ELL2	FABP4	FADD	FBXO27	FOSL1	INO80	ITCH	ITGA2	JUNB	LAMB3	LAMC2	LPCAT4	MAP2K4	MAPK12	MCL1	MED11	MED27	MED30	MED31	MED6	MFAP1	MMP1	MMP10	MMP2	NCF2	NFKB1	NFKBIA	NUMB	PCK2	PLD2	PSEN1	PSMB5	PSMB6	PSME1	REL
CEP-701	na	ABL1	AKT3	APBB1	APH1B	C3AR1	CAMK4	CARM1	CAV1	CDH2	CERK	CSNK2A2	CTNNB1	DGKI	DNER	DPYSL2	DPYSL3	FCER1G	FGFR1	KDSR	KLC1	MAD1L1	MAPK12	NRAS	PDGFRB	PIK3CD	PLCG1	PPP2CB	PYGO1	RAB27A	RABGGTB	S1PR1	SGK1	SLC27A1	SMAD2	SMAD4	SNAP23	SPHK1	SPRY2	TGFB1	TGFB1I1
CHIR-99021	na	ABL2	ABR	ACTN1	ALDOA	ANXA6	AP2S1	ARHGAP1	ARHGAP22	ARHGAP24	ARHGAP29	ARHGEF28	ARHGEF6	ARSE	ARSJ	ATG7	B4GALT7	BAX	BET1	BIN1	BIRC2	BIRC3	BNIP3L	CALR	CAPN2	CASP8	CAV1	CD151	CD44	CFLAR	CHMP6	CHMP7	CHN1	COL1A1	COL27A1	COL4A1	COL4A2	COL6A2	COL6A3	CTGF	CYLD	DEGS1	DLC1	DNM1	DOCK1	DOK1	DPYSL2	DPYSL3	EEA1
CHIR-99021	na	ABL2	ABR	ACTN1	ALDOA	ANXA6	AP2S1	ARHGAP1	ARHGAP22	ARHGAP24	ARHGAP29	ARHGEF28	ARHGEF6	ARSE	ARSJ	ATG7	B4GALT7	BAX	BET1	BIN1	BIRC2	BIRC3	BNIP3L	CALR	CAPN2	CASP8	CAV1	CD151	CD44	CFLAR	CHMP6	CHMP7	CHN1	COL1A1	COL27A1	COL4A1	COL4A2	COL6A2	COL6A3	CTGF	CYLD	DEGS1	DLC1	DNM1	DOCK1	DOK1	DPYSL2	DPYSL3	EEA1
CHIR-99021_md2	module_2	ABLIM3	ACTB	ACTN4	ADAMTS3	ADORA1	AKT3	ANPEP	ANXA1	APP	ARPC1B	BBS9	BCAR1	BDNF	BICD1	C3	C3AR1	CAPZA2	CAPZB	CEP290	CFI	CNN2	CXCL6	CXCL8	DBNL	DCTN2	DOCK11	DOCK2	DOCK4	EBI3	F2R	F2RL2	FGF18	FGFR1	FLT1	FPR1	GLS	GNA12	GNG12	GNG2	GTF2F1	HABP4	HMOX1	HRH1	HSP90B1	HTR1F	ICAM1	IFT57	JAK1
CHIR-99021.1	na	ACTN1	AKT3	ALDOA	ANPEP	AP2S1	ARHGAP17	B4GALT7	C3AR1	CAV1	CD151	CD44	CD63	CHPF2	CHRM2	CHSY3	COL18A1	COL1A1	COL1A2	COL4A1	COL4A2	COL5A1	COL6A1	COL6A2	COL6A3	COL8A1	COL8A2	CREB3L2	CXCL12	CXCL8	ENO2	ETS1	F2R	F2RL2	FGF2	FLT1	FN1	GLS	GPC6	IFI35	IL6	ITGA11	ITGA4	ITGA5	ITGB1	ITGB5	KALRN	KIRREL1	LAMB1
CI-1040	na	A2M	ABR	ACAA1	ACOT8	ACP5	ACSS1	ACSS2	AOC1	APOD	ARAP1	ARAP3	ARHGDIA	ARHGEF1	ARHGEF11	ARPC1B	ARSB	ASPA	BCAN	BECN1	CD44	CD63	CHCHD3	CHCHD6	CHPF	CLCN7	COL9A3	COX5A	CRYL1	CSK	CST3	CSTB	CTSH	CTSK	DYNC1I1	ERBB3	ESRRA	EXOC4	FCER1G	FCGR2A	FGD4	GAB2	GGT7	GLUD2	GPX1	GRN	GSN	GSTK1	GSTP1
CI-1040	na	A2M	ABR	ACAA1	ACOT8	ACP5	ACSS1	ACSS2	AOC1	APOD	ARAP1	ARAP3	ARHGDIA	ARHGEF1	ARHGEF11	ARPC1B	ARSB	ASPA	BCAN	BECN1	CD44	CD63	CHCHD3	CHCHD6	CHPF	CLCN7	COL9A3	COX5A	CRYL1	CSK	CST3	CSTB	CTSH	CTSK	DYNC1I1	ERBB3	ESRRA	EXOC4	FCER1G	FCGR2A	FGD4	GAB2	GGT7	GLUD2	GPX1	GRN	GSN	GSTK1	GSTP1
CI-1040_md2	module_2	ABCB4	ACSBG1	ACSL3	ADCY1	AGPAT2	ASAH1	ATP1A1	ATP1B3	ATP6V0A4	ATP6V0D2	ATP6V1C1	ATP6V1E1	ATP6V1F	ATP6V1H	B4GALT6	BAX	C3AR1	CABLES1	CASP4	CASP8	CCND1	CCNG1	CCNH	CDC16	CDK2	CDK6	CTNNB1	CXCL1	CXCL8	CYP27A1	DDB2	ECM1	ELF1	ENTPD6	FABP7	FHL2	FLT1	FOSL1	GALE	GBA	GLCE	GM2A	GMPR	GPAT3	GPAT4	HBEGF	HES5	HEXB
CP466722	na	ARID4B	CCAR1	CENPC	CUL3	ERCC8	KAT6B	PIAS3	RAD17	RBMX	SMARCE1	SUMO1	TAF9B
CP724714	na	ABCA12	ABCC8	ACSL1	AGO2	AP1M2	ARF1	ARF6	ARFGAP2	ARFGEF2	ARRB1	ATP13A4	ATP13A5	ATP2C2	B3GNT8	BLNK	CISH	CREB3L4	CTNND1	DCXR	DSC2	DSP	EFNA1	EFNA3	ELF3	EPCAM	EPHA1	EPHB4	ERBB2	ERBB3	EVPL	F7	FASN	FGFR3	FGFR4	FKBP4	FMOD	FOXA1	FUT3	GALNT3	GALNT6	GCNT1	GHR	GRB7	INHBB	ITGB6	JUP	KLK3	KRT19
CP724714	na	ABCA12	ABCC8	ACSL1	AGO2	AP1M2	ARF1	ARF6	ARFGAP2	ARFGEF2	ARRB1	ATP13A4	ATP13A5	ATP2C2	B3GNT8	BLNK	CISH	CREB3L4	CTNND1	DCXR	DSC2	DSP	EFNA1	EFNA3	ELF3	EPCAM	EPHA1	EPHB4	ERBB2	ERBB3	EVPL	F7	FASN	FGFR3	FGFR4	FKBP4	FMOD	FOXA1	FUT3	GALNT3	GALNT6	GCNT1	GHR	GRB7	INHBB	ITGB6	JUP	KLK3	KRT19
CP724714_md2	module_2	ACADSB	AKT1	ALDH3B2	ALOX15	ANK3	AR	ARID4B	ATP2A3	ATP8B1	BMP7	BPNT1	CACNA1D	CDH1	CDS1	CENPX	CERS6	CLDN9	CNDP2	COL28A1	CRB3	CYP1A1	CYP2J2	CYP4B1	D2HGDH	DDR1	DEGS2	DGKZ	DHTKD1	DLG3	ERAL1	FA2H	FLAD1	GGCT	GGPS1	GGT6	GNMT	HMGCS2	HSD11B2	IDH2	INPP5J	ITPKC	IYD	LIMK2	MAPK13	MAPK3	MCCC1	MYB	MYO5B
CUDC-101	na	CHD4	CYP7B1	DDX5	DLL1	EIF2B5	GBA2	GSK3B	HES5	JARID2	MSI1	PIGR	PLXNA1	PSME4	PTGS1	SEMA4A	SRGAP3	UNC5B	VPS37B	WNK2	XDH
CX-5461	na	CARS	CCND2	CSH1	EEF2	EIF3A	EXOSC9	FIP1L1	GLMN	GTF2B	IARS	IL2RB	JMJD1C	KDM4A	KDM7A	KIF5A	KLC1	MCL1	MED17	NSUN6	OGT	PDCD11	PSTK	RAD52	RPL9	RPL9P7	RPL9P8	RPL9P9	RPRD1A	RPS12	RPS18	RPS3A	RSL24D1	SAFB	SARS	SECISBP2	SIRT1	SMARCA5	SMG6	SUGP1	TAF5	TCEA1	TGS1	UTP6	WAPL	WRN	YARS
Camptothecin	na	ABL1	ADCY3	ADM	ADORA2B	BDNF	BIRC2	CASP1	CBL	CCL2	CHN1	CLTA	CRK	CSF2	CXCL8	DNAJC8	DOK1	FAS	GBP1	GNB4	HLA-B	HRH1	HSPA5	IFITM3	IL1B	IL6	IL7	IL7R	IRF2	ITGA4	KDSR	MAPK12	MMP1	MT2A	NFKB1	NFKB2	NLRP1	NLRP3	NRAS	NRG1	PML	PRKCQ	PRPF38A	RHOG	S1PR1	SAA1	SEC23A	SF3A3	SOCS2
Cetuximab	na	ARAP1	ARHGAP1	ARHGEF16	ARHGEF4	CDH1	CDH3	CLDN1	CLDN10	CLDN16	CLDN18	COL17A1	COL4A6	CRB3	CTNND1	CTTN	DEPDC1B	DERA	DLL1	DSC2	DSC3	DSG2	DSP	EFNA1	EGFR	EPAS1	ESRP1	ESRP2	EVPL	EZR	FGD4	FOS	FOSB	FZD6	HPSE	ITGA2	ITGA3	ITGB4	ITGB6	ITGB8	IVL	JAG1	JAG2	JUNB	JUP	KRT1	KRT14	KRT6A	LAMA3
Cetuximab	na	ARAP1	ARHGAP1	ARHGEF16	ARHGEF4	CDH1	CDH3	CLDN1	CLDN10	CLDN16	CLDN18	COL17A1	COL4A6	CRB3	CTNND1	CTTN	DEPDC1B	DERA	DLL1	DSC2	DSC3	DSG2	DSP	EFNA1	EGFR	EPAS1	ESRP1	ESRP2	EVPL	EZR	FGD4	FOS	FOSB	FZD6	HPSE	ITGA2	ITGA3	ITGB4	ITGB6	ITGB8	IVL	JAG1	JAG2	JUNB	JUP	KRT1	KRT14	KRT6A	LAMA3
Cetuximab_md2	module_2	ADH7	AKR1C3	ALOX5	CASP4	CDS1	CES2	CYP2C9	CYP4A11	CYP4F3	DDX58	DGKH	HSD17B2	IL18	IRF5	IRF6	LCN2	MGST2	NLRX1	P2RY2	P2RY6	PLD1	PLPP2	PTAFR	PTGES	PTGS1	PYCARD	STAT4	TLR2	UGT2B7	UXS1	ZFP36
Cisplatin	na	ADAMTS3	ADM	ARHGEF25	ATP2B4	B4GAT1	CACNA2D4	CAPZA1	CD3D	CH25H	COL13A1	COL8A1	CTSL	CXCL6	DR1	EBI3	ENAH	ENO1	F2R	FAS	FBXO27	FZD1	GLS	GNAI3	GNB4	GNB5	GNG12	GPC6	HAPLN1	HTR1F	IL7R	LIN28A	LRRK2	MOV10	MYH6	NFKB2	NR1H4	NRBP1	PCOLCE2	PGM1	PRPS1	RGS2	SAA1	SALL4	SOAT1	TCF7L1	TEK	TNFAIP6	TNFRSF9
Cytarabine	na	ADAM17	AKT3	BDNF	CDK7	CPS1	DARS	DIMT1	EIF3I	EPHA5	F2RL2	FPR1	GADD45A	GIP	GNB4	HEATR1	IL12A	IL7	IMPDH2	MAPK12	MYOD1	NFKB1	NFKB2	NOB1	NOC3L	PA2G4	PDCD11	PFDN2	PPP3CB	RACK1	RPL13	RPL15	RPL27	RPL31	RPL37	RPS12	RSL1D1	S1PR1	SOCS5	TAF1A	TGFB2	WDR36	WDR75	XPC	YES1
DMOG	na	ADRB2	ANXA1	ARHGAP29	ARHGDIB	BDNF	BIRC3	C3	C4BPA	CAPN2	CASP1	CASP4	CAST	CD44	CFH	CFI	CFLAR	COL12A1	COL4A3	COL4A4	CTGF	CTSL	CTSS	CXCL1	CXCL2	CXCL6	DUSP1	EFNA5	EPHA2	ERAP1	FBLN1	FGA	FGF2	FGG	FN1	GBP1	GBP2	GNAI1	GNG11	HRH1	HSPG2	ICAM1	IFI35	IFIT2	IFIT3	IFITM2	IFITM3	IL18	IRF1
DMOG	na	ADRB2	ANXA1	ARHGAP29	ARHGDIB	BDNF	BIRC3	C3	C4BPA	CAPN2	CASP1	CASP4	CAST	CD44	CFH	CFI	CFLAR	COL12A1	COL4A3	COL4A4	CTGF	CTSL	CTSS	CXCL1	CXCL2	CXCL6	DUSP1	EFNA5	EPHA2	ERAP1	FBLN1	FGA	FGF2	FGG	FN1	GBP1	GBP2	GNAI1	GNG11	HRH1	HSPG2	ICAM1	IFI35	IFIT2	IFIT3	IFITM2	IFITM3	IL18	IRF1
DMOG_md2	module_2	AGPS	BCL6	BMP2	CD40	CDA	CDC27	CDC42EP3	CEBPD	CXCL8	DDO	DKK1	EPAS1	ETS1	F3	GYS2	HDAC7	IL15	IL6	IL6ST	LYN	MATN3	MORF4L1	NMNAT2	NPEPPS	NRAS	OSMR	PAPSS2	PGM1	PPP1R3C	PSMB8	PTGS2	RAP1A	SEMA3A	SEPT7	SHC1	SLC16A3	SLC20A1	SMAD3	STAT3	TBC1D1	TFPI	TNPO1	TNRC6A
Dabrafenib	na	A2M	ABL2	ABR	ACOT12	ACP5	ACSBG1	ACSL3	ACSS1	AGPAT1	AK2	ALDH1B1	ANK2	AP1S1	AP2S1	APOE	ARAP3	ARFGAP1	ARHGAP24	ARHGDIA	ARHGEF11	ARHGEF2	ARPC1A	ARPC1B	ARSB	ASAH1	ASPA	ATP13A2	ATP5F1A	ATP5F1E	ATP5MC2	ATP5PF	ATP6V0A1	ATP6V0A4	ATP6V0D2	ATP6V1C1	ATP6V1E1	ATP6V1F	ATP6V1H	B4GALT6	BCAN	BECN1	BLK	CABLES1	CAPZB	CD63	CD74	CD81	CDH2
Dabrafenib	na	A2M	ABL2	ABR	ACOT12	ACP5	ACSBG1	ACSL3	ACSS1	AGPAT1	AK2	ALDH1B1	ANK2	AP1S1	AP2S1	APOE	ARAP3	ARFGAP1	ARHGAP24	ARHGDIA	ARHGEF11	ARHGEF2	ARPC1A	ARPC1B	ARSB	ASAH1	ASPA	ATP13A2	ATP5F1A	ATP5F1E	ATP5MC2	ATP5PF	ATP6V0A1	ATP6V0A4	ATP6V0D2	ATP6V1C1	ATP6V1E1	ATP6V1F	ATP6V1H	B4GALT6	BCAN	BECN1	BLK	CABLES1	CAPZB	CD63	CD74	CD81	CDH2
Dabrafenib_md2	module_2	ACVR1	ADCY1	ADCY2	AKT3	ANGPT2	ATP1A1	B3GAT1	B4GAT1	BST1	C3AR1	CACNA1S	CATSPER1	CCND1	CCNG1	CCNH	CD22	CDC16	CDK2	CDK4	CDK5	CHMP6	CHST10	CIAO1	COPS7A	COPS8	CREM	CSK	CTNNB1	CXCL1	DDB2	ERCC1	FKBP1A	FLT1	FYN	GTF2H1	HEY1	HEY2	HTN1	HTN3	ICAM1	IL2RB	ITGA1	KAT2B	KDR	LAMTOR4	LPL	LUM	MAG
Docetaxel	na	ABL1	ACKR3	ACTR1A	ADCY7	ADRB2	AMOTL1	ANXA1	ANXA2	AQP3	ARHGEF25	ARNTL	B2M	BDKRB1	BID	BSG	BTRC	C3	CASP1	CAV1	CDC23	CDK9	CEBPB	COL12A1	COL16A1	COL4A6	CSF2	CYLD	DGKA	DKK1	DUSP7	DYNC1LI2	EPHA5	ERP44	EXOC2	FBLN1	FBXL4	FBXO27	FZD6	GNA12	GNA15	GNAI3	GNB4	GNB5	GNG11	GSTP1	GTF2F2	HRH1	HTR1F
Doxorubicin	na	CDK9	CSNK2A1	ETF1	HNRNPK	KPNA4	MAGOH	PLRG1	PRPF4	RIOK1	RPL34	RPL37	SNW1	TRA2B
Doxorubicin	na	CDK9	CSNK2A1	ETF1	HNRNPK	KPNA4	MAGOH	PLRG1	PRPF4	RIOK1	RPL34	RPL37	SNW1	TRA2B
Doxorubicin_md2	module_2	ATF1	CARS	CCT4	DHX36	DNAJA1	DNAJC18	DNAJC7	GART	IARS	MCL1	PRKCQ	RNF2	SALL4	UBE2D3	WARS
EHT1864	na	ABCC6	ADCY5	AGT	AHSG	AMBP	APOA1	APOA2	APOB	APOC3	BCL2	C5	CCR6	CD8A	CRK	F10	F2	F7	FGA	FGB	FGFR4	FGG	GALNT16	GPC3	GRB2	HPR	HPX	KLB	KNG1	LDB1	MTTP	MUCL1	NR1H4	ORM1	PIAS4	PROZ	SERPINF2	SMAD2	TGFB3	TTR
EHT1864	na	ABCC6	ADCY5	AGT	AHSG	AMBP	APOA1	APOA2	APOB	APOC3	BCL2	C5	CCR6	CD8A	CRK	F10	F2	F7	FGA	FGB	FGFR4	FGG	GALNT16	GPC3	GRB2	HPR	HPX	KLB	KNG1	LDB1	MTTP	MUCL1	NR1H4	ORM1	PIAS4	PROZ	SERPINF2	SMAD2	TGFB3	TTR
EHT1864_md2	module_2	ABCA12	ACADSB	AGXT	CACNA1D	CASK	COQ7	CYP2R1	DECR2	DOHH	ESR2	FAHD1	FECH	GAMT	GGPS1	GNMT	GRIA1	HGD	HSD17B10	IDH2	ING5	MAPT	MBTPS2	MED16	MPC2	MVK	MZT2B	NDUFAF6	PAH	PDSS2	PMVK	PNPLA7	POR	SESN2	SIRT3	SOAT2	SRR	SSNA1	SULT2A1	SUMF1	SUOX	TM7SF2	UROS	WWOX	ZFPM1	ZNF263
EKB-569	na	AFDN	ALOX12B	ALOX5	ARF6	ATG5	B3GNT2	B3GNT3	B3GNT4	B3GNT5	B3GNT7	BLNK	CALML5	CANT1	CASK	CASP10	CD9	CDH1	CDH3	CLDN1	CLDN2	COL17A1	CRB3	CTNND1	CYP2J2	CYTH1	DAPP1	DLG3	DNAJB1	DSC2	DSC3	DSG2	DSP	EFNA1	EFNB2	EGFR	EGR1	EPHA1	ERBB2	EVPL	EZR	FOS	FUT3	GALNT12	GALNT3	GALNT6	GALNT7	GCNT1	GCNT3
EKB-569	na	AFDN	ALOX12B	ALOX5	ARF6	ATG5	B3GNT2	B3GNT3	B3GNT4	B3GNT5	B3GNT7	BLNK	CALML5	CANT1	CASK	CASP10	CD9	CDH1	CDH3	CLDN1	CLDN2	COL17A1	CRB3	CTNND1	CYP2J2	CYTH1	DAPP1	DLG3	DNAJB1	DSC2	DSC3	DSG2	DSP	EFNA1	EFNB2	EGFR	EGR1	EPHA1	ERBB2	EVPL	EZR	FOS	FUT3	GALNT12	GALNT3	GALNT6	GALNT7	GCNT1	GCNT3
EKB-569_md2	module_2	AGPAT2	CDS1	CEL	CERS6	DEGS2	DGKZ	LPIN3	MBOAT1	ORMDL3	PIK3C2B	PIP4K2C	PLCB3	PLPP2	SGPL1	SGPP2	SPTLC2
EX-527	na	ADCY8	AR	B3GAT1	BCAN	COL11A1	EDNRB	GNAL	GPC4	ITGA7	ITGA9	KLK2	KLKB1	MFAP5	ONECUT1	PAK3	PDE3A	PDE4B	PDE7B	PPARGC1A	PRKCB	RORB	STAT5B	TLR4
Elesclomol	na	ABL1	ACTR1A	ADAM17	AKT3	ALDH7A1	ARHGAP10	ARHGEF17	ATF2	BABAM1	BAD	BDNF	BLVRA	BTRC	CAV1	CBL	CDC23	CDC27	CEP78	CHN1	CRK	CTGF	DAXX	DOCK1	DPYD	DYNLL1	EFNB3	ENAH	EPHA5	ETS1	EYA4	F2R	FBXO27	FER	FGD1	FGF2	FGFR1	GLI1	GNAI3	GRHPR	IGF2BP1	INPP5A	ITSN1	LHX2	MAPK7	MYBL1	MYH10	MYL12A	NRAS
EpothiloneB	na	BMS1	CDC37L1	CDK9	CEBPZ	CSNK2A1	CSNK2A2	DDX31	DIMT1	EIF3D	EIF3J	EIF3M	ETF1	EXOSC1	EXOSC2	FAU	FCF1	LYAR	MAGOH	MIS12	MTREX	NOB1	NOP2	NUP160	NUP54	PDCD11	PHF5A	PRMT3	PRPF4	PUM3	RCL1	REXO4	RIOK1	RPL13	RPL27	RPL37	RPL37A	RPL5	RPL7L1	RPL9	RPL9P7	RPL9P8	RPL9P9	RPS12	RPS15A	RPS18	RPS4X	RPS6	RRP12
EpothiloneB	na	BMS1	CDC37L1	CDK9	CEBPZ	CSNK2A1	CSNK2A2	DDX31	DIMT1	EIF3D	EIF3J	EIF3M	ETF1	EXOSC1	EXOSC2	FAU	FCF1	LYAR	MAGOH	MIS12	MTREX	NOB1	NOP2	NUP160	NUP54	PDCD11	PHF5A	PRMT3	PRPF4	PUM3	RCL1	REXO4	RIOK1	RPL13	RPL27	RPL37	RPL37A	RPL5	RPL7L1	RPL9	RPL9P7	RPL9P8	RPL9P9	RPS12	RPS15A	RPS18	RPS4X	RPS6	RRP12
EpothiloneB_md2	module_2	BID	BIRC3	CARS	DARS	DNM1	DNM1L	EPHB2	GLUD1	GTF3C4	HAUS2	HMGA1	HSP90AB1	IARS	IL15RA	INO80	IRAK2	JUNB	KARS	KPNA4	LRRC8A	LYN	MCL1	NEDD1	NFKB2	PRKCI	PSMA4	TARS	TBP	TJP1	TNFRSF10A	TRAF2	TRAF3	YARS	YARS2	ZKSCAN4	ZNF143
Etoposide	na	ABCE1	AGO3	ANAPC10	BBS10	C1QBP	CCT5	CCT7	CCT8	CDC5L	CDK9	DDX21	DIMT1	DNAJA1	DNAJC7	DNAJC8	E2F5	EIF1	EIF2S3	EIF3D	EIF3E	EIF3M	ELP1	ELP5	ETF1	EXOSC2	EXOSC9	GEMIN2	HBS1L	HSPA4	HSPA4L	HSPA5	IARS	IMPDH2	ITGB3BP	LARS	LIG4	LTV1	MAD2L2	MAGOH	MARS	METAP1	METAP2	MIS12	MORF4L1	MTA1	NCBP2	NUP155	NUP188
Etoposide	na	ABCE1	AGO3	ANAPC10	BBS10	C1QBP	CCT5	CCT7	CCT8	CDC5L	CDK9	DDX21	DIMT1	DNAJA1	DNAJC7	DNAJC8	E2F5	EIF1	EIF2S3	EIF3D	EIF3E	EIF3M	ELP1	ELP5	ETF1	EXOSC2	EXOSC9	GEMIN2	HBS1L	HSPA4	HSPA4L	HSPA5	IARS	IMPDH2	ITGB3BP	LARS	LIG4	LTV1	MAD2L2	MAGOH	MARS	METAP1	METAP2	MIS12	MORF4L1	MTA1	NCBP2	NUP155	NUP188
Etoposide_md2	module_2	ATF1	ATF4	CDC37L1	CEP78	COPS3	DVL2	FBXW11	GLMN	GTF3C4	HAUS6	HSP90AB1	MYH10	NEDD1	RNGTT	SLC38A2	SNAPC3	TAF12	TBP	TBPL1	YWHAE	ZNF143
FH535	na	A2M	ACACB	ACADM	ACO2	AGPAT1	AGXT	ALAS1	ARHGEF11	ATIC	ATP5F1B	ATP6V0A4	ATP6V1F	BYSL	CABLES1	CDK2	CERK	CERS2	CHCHD6	CHPT1	COX18	CRYL1	DPH5	EIF2S3	F2	FASN	FKBP1A	GAPDHS	GLDC	GLUD2	HADHA	HARS	HEY1	HSD17B10	HSP90AB1	IMMT	KAT2B	LRRK2	MED12	MRPL24	MRPL42	MRPS18B	MRPS25	NARS2	NDUFA6	NDUFAF4	NDUFB11	NDUFB5	NDUFS1
FK866	na	ACTL6B	ACTR5	AGO3	ALMS1	BMS1	CCAR1	CCP110	CCT7	CCT8	CDC37L1	CDC7	CEP131	CEP152	CEP57	CEP70	CEP78	CEP97	CLASP2	CLNS1A	CNOT10	CNTRL	CPSF3	CSNK1E	CSTF3	CTNNA2	CTR9	CWC22	DARS	DIS3	DYNC1LI1	EIF2B3	EIF2S2	EIF3A	EIF3D	ELP1	ELP2	ELP3	ELP4	ELP5	ESRRG	EXOSC1	EXOSC10	EXOSC9	FAAP20	FANCE	FBL	GEMIN2	GNL3
FK866	na	ACTL6B	ACTR5	AGO3	ALMS1	BMS1	CCAR1	CCP110	CCT7	CCT8	CDC37L1	CDC7	CEP131	CEP152	CEP57	CEP70	CEP78	CEP97	CLASP2	CLNS1A	CNOT10	CNTRL	CPSF3	CSNK1E	CSTF3	CTNNA2	CTR9	CWC22	DARS	DIS3	DYNC1LI1	EIF2B3	EIF2S2	EIF3A	EIF3D	ELP1	ELP2	ELP3	ELP4	ELP5	ESRRG	EXOSC1	EXOSC10	EXOSC9	FAAP20	FANCE	FBL	GEMIN2	GNL3
FK866_md2	module_2	AIP	ANP32A	ARNT	ASIC1	ATP5F1A	BTRC	BUB3	CAMKMT	CCAR2	CKAP5	COPS2	COPS3	COPS4	CUL3	DCUN1D2	DDX21	DLL1	DLX6	DPH5	DPH6	DVL2	EEF1A1	EEF2	EIF1B	EIF3M	ELAVL1	EPS15	FGF21	FOXG1	FZD3	GLMN	HDAC1	HDAC2	HSPA5	IGF2BP1	KIF19	LHX2	LHX3	MAGOH	MED18	MED30	MRPL34	MRPS5	MRPS9	MTF2	NACA	NCBP2	NCOR1
FMK	na	CASP8	CLDN2	CR2	ERCC8	FAS	ITGA2	NF2	SFTPA1	SPRY1	TMEM173	TNFRSF10C	TNFSF9
FTI-277	na	ACTN1	AKT3	CAPN2	CAV2	CLIP1	CREB3	F3	FGF2	GADD45A	HBEGF	IL24	ITGA3	ITGB1	MMP14	MYH9	MYLK	NGF	PLK3	PPP1R15A	PXN	SERPINE1	TGFB2
GDC0941_rescreen_	na	AMOTL2	ARHGAP29	BIRC3	C3	CD40	CHST15	CLDN1	COL12A1	EHHADH	ERBIN	HSPG2	IL15	IL15RA	IL18	ITGB1	ITGB6	LAMA3	LDHA	LPAR1	MPP5	MYL6	NECTIN2	NF2	PLAU	SAA1	SDC4	TNF	TNFSF10	UBE2D1
GSK-650394	na	ABCE1	ANAPC10	BYSL	CDC37L1	CSNK2A1	CSNK2A2	DDX21	DIMT1	EEF1A1	EEF1D	EEF2	EIF1	EIF2S2	EIF3D	EIF3E	EIF3M	FAU	GAR1	GEMIN2	GRPEL1	GTF3C4	HSP90AB1	HSPA9	IARS	INO80	KARS	LARS	MAGOH	MCRS1	MRPL2	MTA1	NOB1	NOC3L	NOL6	NOP2	NUP160	NUP54	PDCD11	PHB2	PHF5A	POLR1B	POLR1C	POLR3D	PRPF4	RIOK1	RPL11	RPL13	RPL13A
GSK-650394	na	ABCE1	ANAPC10	BYSL	CDC37L1	CSNK2A1	CSNK2A2	DDX21	DIMT1	EEF1A1	EEF1D	EEF2	EIF1	EIF2S2	EIF3D	EIF3E	EIF3M	FAU	GAR1	GEMIN2	GRPEL1	GTF3C4	HSP90AB1	HSPA9	IARS	INO80	KARS	LARS	MAGOH	MCRS1	MRPL2	MTA1	NOB1	NOC3L	NOL6	NOP2	NUP160	NUP54	PDCD11	PHB2	PHF5A	POLR1B	POLR1C	POLR3D	PRPF4	RIOK1	RPL11	RPL13	RPL13A
GSK-650394_md2	module_2	ABRAXAS1	ATF1	ATF4	BID	DDIT4	DUSP7	ELP1	EXOSC1	GART	GLUD1	GOT1	IMPDH2	MTHFD1L	NEDD1	PARP2	POLL	PPAT	PPRC1	SHMT2	SIRT6	SLC38A2	TAF5	TCF3	TIAL1	TNFRSF10D	TNIP2	TRIB3	TWNK	XPO5
GSK1070916	na	ALMS1	ANAPC4	ARID4B	BRCA1	CCAR1	CCND2	CKAP5	CREB1	CUL1	DLX5	E2F2	EZH2	FANCG	FBL	FBXO10	FGF10	FGF20	FZD3	GCG	GLMN	HDAC1	HDAC2	HNRNPDL	HNRNPH1	HNRNPM	HNRNPR	ITGB3BP	KDM1A	LEMD3	MAGOH	MAML1	MEIS1	MFAP1	MGA	NCL	PCNT	PDS5B	PRKCB	PRPF38A	PSMA4	RANBP2	RBMX	RMI1	SFPQ	SMAD1	SMARCA5	SRSF11	SRSF7
GSK2126458	na	ANK3	ERBB2	GRB7	GUCY1A1	GUCY1B1	HLA-C	HS3ST1	KLK3	MUCL1	MYO6	ST14	SYTL1	TGFB3	XDH
GSK269962A	na	ACTG2	ACTN1	AP2A2	AP4M1	APBB1IP	B4GALT2	B4GAT1	BACE1	CHPF2	COL11A1	COL12A1	COL13A1	COL1A1	COL1A2	COL27A1	COL3A1	COL4A1	COL4A2	COL5A1	COL5A2	COL6A1	COL6A2	COL6A3	COL7A1	COL8A1	COL8A2	CTGF	DCN	DNM1	DPYSL2	DPYSL3	DPYSL4	FGFR1	FLNC	FN1	GAS6	GDF5	GPC6	HS3ST3B1	INHBE	ITGA11	ITGA5	ITGB1	LAMB1	LAMC1	LRP1	LUM	MMP19
GSK269962A	na	ACTG2	ACTN1	AP2A2	AP4M1	APBB1IP	B4GALT2	B4GAT1	BACE1	CHPF2	COL11A1	COL12A1	COL13A1	COL1A1	COL1A2	COL27A1	COL3A1	COL4A1	COL4A2	COL5A1	COL5A2	COL6A1	COL6A2	COL6A3	COL7A1	COL8A1	COL8A2	CTGF	DCN	DNM1	DPYSL2	DPYSL3	DPYSL4	FGFR1	FLNC	FN1	GAS6	GDF5	GPC6	HS3ST3B1	INHBE	ITGA11	ITGA5	ITGB1	LAMB1	LAMC1	LRP1	LUM	MMP19
GSK269962A_md2	module_2	ACLY	ALDH1B1	ANGPT1	ANPEP	ARSJ	ATG7	ATP5F1A	BDNF	BET1L	BSG	CCL2	CD151	CD33	CD81	CD99	CH25H	CHI3L1	CXCL12	DPH5	EEF2	F2RL2	FGF1	FGF2	FPR1	GJA1	HIPK2	IL6	LMAN1	MAP2K2	MMP9	NFIC	NFIX	NPR2	PHF21A	PLCG1	POLR2L	POLR3D	POLR3GL	RAB3B	RUNX2	SCG2	SEC13	SEC22C	SEC23A	SEC24D	SEC31A	SMAD2	SMAD4
GSK429286A	na	ABL1	AKT3	AP4M1	BDNF	CCR1	CDH2	CHRDL1	CUL4B	DCAF6	DNM1	F2R	F2RL2	FGF2	FGF21	FGFR1	GALNT10	GFRA1	HGF	ITGAV	ITGB1	LUM	MYBL1	NDST1	NF2	PARD3	PDGFC	PDGFRB	PICALM	RASA1	RELN	RHOBTB1	SAP30	SDC2	SMAD4	SMAD5	TAF9B	TCF12	TGFB2	TLE4	UCHL1	USP47	VCL	WNT2B	YWHAQ
GSK690693	na	ACPP	ACTL6A	AGO2	ALOX15	AR	ARG2	ARHGAP44	ARID1B	ARID4B	CACNA1D	CACNA2D2	CALML5	CAMK2B	CCAR1	CCNE2	CDK19	CENPX	CHDH	COX6C	CYP2C19	CYP2D6	DLG3	E2F2	EPHX2	ERBB2	FANCG	FKBP4	FLAD1	FOXA1	FZD3	GATA2	GTPBP3	GUCY1A1	KLK2	KLK3	LRIG1	LSM4	MAFB	MED1	MED22	MED23	MED24	MRPL18	MSX2	MT-CO3	MYO6	NDUFA8	NDUFB1
GW-2580	na	AP1M2	BCL2L1	MPP5	MYL6	NPY	NT5C2	NTRK1	PIK3AP1	PPBP	RASGRP3	SPTAN1	WWC1
GW441756	na	CD14	COX10	ENSA	FECH	GHR	HIST1H1A	HSPA2	LBP	MDH1	MTMR12	NDUFS2	PBX1	PIP5K1A	PPARGC1B	PPP2R5A	STAT3	TCF7L1	TLR7
Gefitinib	na	ACVR1C	ADORA2B	ADRB2	AGPAT2	AKAP13	ALOX12	ALOX12B	ANOS1	ARAP1	ARHGAP1	ARHGDIB	ARHGEF16	ARHGEF18	ARHGEF4	CAPN1	CASP1	CASP10	CASP4	CAST	CAV1	CDH3	CDH8	CDS1	CLDN1	CLDN16	COL17A1	COL4A6	CRB3	CTNND1	CTSV	DAB2IP	DDX58	DGKA	DGKH	DLL1	DNAJB1	DSC1	DSC2	DSC3	DSG2	DSP	DTX2	DTX4	EFNA1	EGFR	EPHA1	EVPL	FADD
Gefitinib	na	ACVR1C	ADORA2B	ADRB2	AGPAT2	AKAP13	ALOX12	ALOX12B	ANOS1	ARAP1	ARHGAP1	ARHGDIB	ARHGEF16	ARHGEF18	ARHGEF4	CAPN1	CASP1	CASP10	CASP4	CAST	CAV1	CDH3	CDH8	CDS1	CLDN1	CLDN16	COL17A1	COL4A6	CRB3	CTNND1	CTSV	DAB2IP	DDX58	DGKA	DGKH	DLL1	DNAJB1	DSC1	DSC2	DSC3	DSG2	DSP	DTX2	DTX4	EFNA1	EGFR	EPHA1	EVPL	FADD
Gefitinib_md2	module_2	ACSS2	ADH7	AHR	ALCAM	ALDH3A1	AP1M2	ARF6	ATP2A2	BAIAP2	BLNK	CALB1	CBLB	CD47	CD86	CEBPD	CTTN	CYP1A1	CYP24A1	CYP2S1	CYTH1	DAPP1	DUSP7	DUSP9	EGR1	EHHADH	EIF2AK2	ESRRA	EZR	FOXO1	FTH1	FYB1	GRN	IFNB1	IFNGR1	IFNLR1	IL1B	IL20RB	IL4R	IL6R	IRF1	ITPR3	KLF5	KLK7	LYN	MAOA	MAPK13	ME1	MED11
Gemcitabine	na	ANAPC10	BMS1	CCT6A	CCT7	CSNK2A1	CSNK2A2	DARS	DIMT1	DVL2	EIF2S3	EXOSC1	EXOSC9	HMGA1	HSP90AB1	HSPA4L	IARS	IMPDH2	ITGB3BP	KARS	KIF2A	MAGOH	METAP1	METAP2	MIS12	MOV10	MTREX	NIP7	NOB1	NOC3L	NOLC1	NUP37	NUP54	PDCD11	PFAS	PFDN2	PGM2	PPAT	RACK1	RNF2	RPF1	RPF2	RPL13	RPL18	RPL35	RPL35A	RPL37A	RPL5	RPS12
GenentechCpd10	na	ALMS1	ARID2	B3GNT4	CCND2	CREB1	DNM1	DYNC2LI1	ESRRG	FGF9	GCG	GPC2	HDAC2	ITGB3BP	KDM4D	KERA	MAPK10	NDST3	POU5F1	SAP30	SH3GL3	SMARCE1	YWHAQ
HG-6-64-1	na	ABI2	ABL1	ACTA2	ACTB	ACTR1A	ANGPT1	APBB1IP	ARFGAP3	ARL13B	ATF2	BACE1	BBS10	BBS9	BDNF	CALD1	CAP2	CAPZB	CAV1	CDC27	CFL2	CHN1	CNN2	COL11A1	COL8A1	DEPDC7	DVL2	DYNLL1	GLI1	GTF2F1	ILK	ITGAV	ITGB1	KIF7	LAMB2	LAMC1	MAP2K2	MAPK12	MINPP1	MYLK	NECAP2	NPHP1	NRG1	NTNG2	PARVA	PDGFA	PDGFRB	PFN1	PFN2
I-BET	na	ACPP	AR	ARID4B	CECR2	DOT1L	FGF4	FGFR4	GNMT	JUND	KAT6B	KLK2	KLK3	LEFTY2	MRPL20	MYB	POMC	POU5F1	PRDM14	RNF41	RPL34	RPS3A	SIRT1	SMARCA5	STAR	UBA52	ZBTB16	ZSCAN10
IOX2	na	ARPC5	BDKRB1	CALR	HAS1	IQGAP1	KIRREL1	MYO1C	RHOC	SEC31A	SLIT2	THY1	TP53	TPM4
IPA-3	na	BBS10	CSNK2A1	CUL7	EEF2	EIF3G	ELP2	FBXL5	FBXW11	HSP90AB1	NACA	NOC3L	POLR3A	POLR3D	POLR3F	RACK1	RBPJ	RING1	RPL18	RPL19	RPL23	RPL24	RPL27	RPL35	RPL9	RPL9P7	RPL9P8	RPL9P9	RPS18	RPS5	SIN3B	SNW1	UIMC1
JNJ-26854165	na	ABLIM3	ACTN1	ACTR1A	ADAMTS3	AP2S1	ARHGAP22	ARHGAP28	ARHGEF6	BDKRB1	C3AR1	CALR	CAPZB	CFL1	CFL2	CRK	DEGS1	EGFR	ENAH	ERAP2	FGD1	FGF11	FGFR1	GPC1	GPC6	GPNMB	HGF	HIPK2	ITGA3	ITGAX	LMAN1	LPAR1	MCFD2	MITF	MMP1	MMP3	MRTFA	MSR1	MYH9	NDST1	NRAS	PAFAH1B1	PCOLCE2	PFN2	PIK3CD	RHOC	RHOQ	S1PR3	SDC2
JNJ-26854165	na	ABLIM3	ACTN1	ACTR1A	ADAMTS3	AP2S1	ARHGAP22	ARHGAP28	ARHGEF6	BDKRB1	C3AR1	CALR	CAPZB	CFL1	CFL2	CRK	DEGS1	EGFR	ENAH	ERAP2	FGD1	FGF11	FGFR1	GPC1	GPC6	GPNMB	HGF	HIPK2	ITGA3	ITGAX	LMAN1	LPAR1	MCFD2	MITF	MMP1	MMP3	MRTFA	MSR1	MYH9	NDST1	NRAS	PAFAH1B1	PCOLCE2	PFN2	PIK3CD	RHOC	RHOQ	S1PR3	SDC2
JNJ-26854165_md2	module_2	ADAMTS12	APH1B	CASP1	CCND1	CHMP6	E2F7	ELL2	ELOC	ETS1	FADD	IL1A	IL1B	IL6	IL7R	LY96	MAF	MAP4K4	NDN	NF2	NFKB1	NLRP1	NRG1	NSMAF	OSMR	OTUB1	PANX1	PTHLH	RIPK2	TGFB1	TNFAIP3	TNFRSF9	UBE2L6	UBE2V2
JNK-9L	na	ADAM17	ATF4	BYSL	CDK8	CSNK2A1	CSNK2A2	DARS	DDIT4	DDX21	EIF2S3	EIF3E	EIF3M	ETF1	GOT1	GRPEL2	HSP90AB1	HSPA9	LARS	MRPL2	MRPS10	MTHFD2	MYBBP1A	NFKB2	NIP7	NOB1	NOC3L	NOP2	PDCD11	PHB2	POLR1B	POLR1D	PRMT3	PSAT1	PSPH	RCL1	RIOK1	RPF2	RPL11	RPL27	RPL30	RPL5	RPL8	RPL9	RPL9P7	RPL9P8	RPL9P9	RPS15A	RRP12
JNKInhibitorVIII	na	ADRB2	CAMK2A	DUSP1	EDN2	EGFR	ERAP2	HSPA2	IFITM2	ITGA3	ITGAD	LAMA3	LAMC2	MMP13	NOS1	OSMR	PLAU	PTHLH	S1PR5	SOCS3	STAT3	STAT4	TNFRSF1A	TNFSF10	TRAF1	WNT7A	WNT7B
JQ1	na	ABCC8	ADH1A	CHGB	FFAR2	GAD2	GAST	GCK	GHRL	GNAT3	GPBAR1	GPR119	HRH3	INSM1	KDM1B	NPW	PAX4	PCSK1	RFX6	SI	SLC6A4
KIN001-055	na	ANOS1	ARAP1	ARHGAP30	ARHGDIB	ARHGEF16	ARHGEF4	BIRC3	CASP6	CDH1	CDH3	CLDN1	CLDN9	COL17A1	COL4A6	CRB3	CTNND1	DAB2IP	DSC2	DSG2	DSP	EGFR	ESRP1	ESRP2	EVPL	FGD4	HPSE	ITGA2	ITGB4	ITGB6	IVL	JAG2	JUNB	JUP	KRT8	LAMA3	LAMA5	LAMB3	LAMC2	LYN	MMP7	NET1	PAK6	PATJ	PKP3	PPL	PRKCI	REL	RHOD
KIN001-055	na	ANOS1	ARAP1	ARHGAP30	ARHGDIB	ARHGEF16	ARHGEF4	BIRC3	CASP6	CDH1	CDH3	CLDN1	CLDN9	COL17A1	COL4A6	CRB3	CTNND1	DAB2IP	DSC2	DSG2	DSP	EGFR	ESRP1	ESRP2	EVPL	FGD4	HPSE	ITGA2	ITGB4	ITGB6	IVL	JAG2	JUNB	JUP	KRT8	LAMA3	LAMA5	LAMB3	LAMC2	LYN	MMP7	NET1	PAK6	PATJ	PKP3	PPL	PRKCI	REL	RHOD
KIN001-055_md2	module_2	ALOX5	ANXA1	AP1M2	AP1S3	CAPN1	CEBPD	CTSH	CTSV	CXCL16	CYP24A1	DAPP1	ELF3	EPCAM	F3	FOS	FYB1	GNA15	GRB7	IL18	IL4R	IRF6	KRT19	KRT6A	KRT7	LCN2	P2RY2	P2RY6	PIGR	PTAFR	PTGES	PTGS1	PTK2	PTPN6	RXRA	SERPINB10	SKAP2	SLPI	THBD	TLR2	UNC93B1
KIN001-102	na	ACADSB	ACO2	ACOX1	ACPP	ACSL1	AGO2	ALDH3B2	ALOX15	ALOX15B	ANAPC7	AR	ARF6	ARHGAP32	ARHGAP39	ARHGAP44	ARHGEF16	ARID2	ARID4B	ASS1	ATP5F1C	ATP5ME	ATP6V1G1	B3GNT4	BCKDHB	BLVRB	BRCC3	CACNA1D	CACNG3	CALML5	CAMK2B	CATSPER3	CATSPERB	CBX4	CCAR1	CCT3	CCT6B	CDS1	CFD	CHDH	COX6C	CPT2	CSAD	CSTF1	CYC1	CYTH1	D2HGDH	DCTPP1	DHTKD1
KIN001-102	na	ACADSB	ACO2	ACOX1	ACPP	ACSL1	AGO2	ALDH3B2	ALOX15	ALOX15B	ANAPC7	AR	ARF6	ARHGAP32	ARHGAP39	ARHGAP44	ARHGEF16	ARID2	ARID4B	ASS1	ATP5F1C	ATP5ME	ATP6V1G1	B3GNT4	BCKDHB	BLVRB	BRCC3	CACNA1D	CACNG3	CALML5	CAMK2B	CATSPER3	CATSPERB	CBX4	CCAR1	CCT3	CCT6B	CDS1	CFD	CHDH	COX6C	CPT2	CSAD	CSTF1	CYC1	CYTH1	D2HGDH	DCTPP1	DHTKD1
KIN001-102_md2	module_2	ALDH6A1	GRHL1	HADH	HMGCS2	LDHD	MCCC1	MCCC2	MCEE	MMAA	MMACHC	PCCB	PRODH	PYCR1	SLC5A6
KIN001-236	na	BTK	BTLA	CCR7	CD19	CD72	CD80	CD86	CR2	FCER2	FGR	IKZF3	IL12B	IL2RG	IL3RA	ITGB7	LTA	P2RY10	PIGR	PILRA	PTPRC	SELL	SLAMF6	SLAMF7	TLR7	TNFRSF13B	TNFRSF17	TNFRSF4	TRAT1
KIN001-244	na	ACTN2	BTK	BTLA	CAMK4	CD19	CD80	CD86	EPHB1	FCGR2B	FGR	IL12B	LTA	PIKFYVE	PLD4	PLEK	PRKCB	PTPRC	TNFRSF13B	TNFRSF17	TRAT1
KIN001-260	na	BTK	BTLA	CCR7	CD19	CD22	CD72	CD80	CD86	FCER2	FLT3	FPR2	IL3RA	IRF4	KLRD1	LTA	RGS1	SELL	TNFRSF13B	TNFRSF17	TRAT1
KIN001-270	na	ACTR1A	ALDH7A1	ALMS1	AOX1	CACNA2D2	CDC20	CDCA8	CDO1	CENPE	CENPF	CENPI	CEP192	CEP78	CTNNA2	DDX4	DNMT3B	DNMT3L	ERCC6L	FBXO5	FGF1	FGF4	IL4I1	KIF20A	KIF5A	LIN28A	MTF2	MTR	ORC3	PCNT	PFAS	PHF21A	PIAS3	PIN1	POU5F1	PPP2R5D	PPP3CB	PRDM14	PSMA8	RBPJ	RPA1	RPA2	SAP30	SGO2	SLC32A1	SMS	SPDL1	SUFU	SUMO1
KIN001-270	na	ACTR1A	ALDH7A1	ALMS1	AOX1	CACNA2D2	CDC20	CDCA8	CDO1	CENPE	CENPF	CENPI	CEP192	CEP78	CTNNA2	DDX4	DNMT3B	DNMT3L	ERCC6L	FBXO5	FGF1	FGF4	IL4I1	KIF20A	KIF5A	LIN28A	MTF2	MTR	ORC3	PCNT	PFAS	PHF21A	PIAS3	PIN1	POU5F1	PPP2R5D	PPP3CB	PRDM14	PSMA8	RBPJ	RPA1	RPA2	SAP30	SGO2	SLC32A1	SMS	SPDL1	SUFU	SUMO1
KIN001-270_md2	module_2	AK4	COL13A1	COL23A1	CSTF3	DNAJC8	ELAVL1	ENPP1	EXOSC9	GNAI3	GPC2	GPC4	GTF3C1	HS3ST4	NDST1	PDE1C	PDE6G	PDE7A	POLR3F	TAF11
KU-55933	na	ADRB2	ANXA1	BIRC3	CXCL8	DUSP1	EDN2	EGFR	GLS	NFKBIA	NTRK3	PTHLH	SMAD3	STAT3	STAT4	WNT7B
LAQ824	na	ACTR5	CHD4	DDX31	EIF3E	EIF3H	EIF4B	FBL	GTF3C4	GTF3C5	HSPD1	KDM1A	MCRS1	MRPS2	MRRF	MTA1	NACA	NAT10	NOC2L	NOP53	NOP56	PA2G4	PDCD11	PHB2	POLR1D	POLR3E	RACK1	RCL1	RNF2	RPL13A	RPL18	RPL22	RPL23	RPL24	RPL27	RPL3	RPL30	RPL32	RPL35	RPL35A	RPL37	RPL38	RPL5	RPL8	RPS12	RPS15A	RPS18	RPS6	RSL24D1
LAQ824	na	ACTR5	CHD4	DDX31	EIF3E	EIF3H	EIF4B	FBL	GTF3C4	GTF3C5	HSPD1	KDM1A	MCRS1	MRPS2	MRRF	MTA1	NACA	NAT10	NOC2L	NOP53	NOP56	PA2G4	PDCD11	PHB2	POLR1D	POLR3E	RACK1	RCL1	RNF2	RPL13A	RPL18	RPL22	RPL23	RPL24	RPL27	RPL3	RPL30	RPL32	RPL35	RPL35A	RPL37	RPL38	RPL5	RPL8	RPS12	RPS15A	RPS18	RPS6	RSL24D1
LAQ824_md2	module_2	ATF4	BAZ2A	CRNKL1	CSNK2A1	DVL1	E2F5	FGFR3	FGFR4	FKBP4	HDAC1	HNRNPA0	HNRNPK	HSP90AB1	INTS11	PPP1CC	PRKCZ	PRPF19	PTGES3	RCC2	SSU72	UBA52	UBE2I	ZC3H8
LFM-A13	na	ACTN4	APBB1IP	ARHGAP1	BCAR1	CXCL5	DNM1	DOCK2	F8	FGB	HPSE2	HSPG2	HTR2A	IAPP	IFNAR1	ITGA3	ITGAV	ITGB1	ITGB5	ITSN1	JAK1	KIRREL1	MYH9	MYL6	MYO1C	NDST1	PARD3	RHOC	SORBS3	SPP1	SST	STAM2	STX4	TFPI	THBS3	TLN2	TNS3	VLDLR
LY317615	na	AP1S3	BIRC3	CASP6	CASP8	CCND1	CD2AP	CDC73	CLDN2	CTNND1	CTSS	EPB41L1	EPHA2	EVPL	JUP	KRT19	KRT7	KRT8	MRPL1	MYO6	OAS1	PLEC	PTK6	PTPN6	SLPI	TJP1
Lenalidomide	na	COL17A1	CTSV	EGFR	HMOX2	HSPA2	KRT1	KRT14	KRT6A	KRT9	MMP13	MYO1C	NDE1	NF2	PTHLH	PXN	REL	SPRR1B	TXNRD2	UBE2G1	UFD1
MK-2206	na	ABCG1	ACADSB	ACMSD	ADIPOQ	ALDH2	ALDH3B2	ALOX15	ALOX15B	ATP5F1C	ATP5MC1	BLVRB	CISH	CP	CSH1	DECR2	DERL1	DHCR24	DNM2	ENPP3	ERBB2	FGF4	FGFR4	GGPS1	GPC5	GSTM3	HMOX2	HSD3B7	LIN28A	LIPC	MED24	MPC2	MPO	MRPL13	MUCL1	NDUFA6	NDUFAF6	NDUFB10	NDUFB9	NOS1	NUDT12	PANK3	PRDM14	RHOB	SLC35A1	SLC35B3	SOD1	UQCRB	VAV3
MLN4924	na	ABL1	ACD	ADARB1	ADCY3	BBS10	BBS2	C3AR1	CDK9	DERL2	DNM1L	DVL2	GNB5	HEBP1	MAPK12	MED31	MIS12	MOV10	MYBBP1A	MYO1C	NEDD1	NFKB1	NFKB2	NR1H2	PAK2	PFDN2	PFN1	PRPF8	RGS19	RGS20	RPS4X	SOCS2	TMEM67	TSR1	UBXN7	USP22	WDR3	XRN2
MP470	na	AKR1D1	ALDH1B1	ALDH3B2	ALOX15	AMHR2	ANO7	ATP13A4	CD33	CSF3R	CYP19A1	DOK2	ENPP3	ENTPD8	FASLG	FCER1A	FGFR4	GHR	GNMT	ITK	LCT	MYB	NEU4	PPFIA3	SLC22A7	SLC26A3	SMPD2
MPS-1-IN-1	na	BAZ2A	CPSF3	CPSF6	DDX31	DHX15	DIS3	EEF2	EIF3A	EIF3E	EIF3J	EIF3M	EIF4B	EXOSC2	FZD3	GTF2F2	GTF3C5	HNRNPA0	HNRNPA2B1	HNRNPDL	HNRNPH1	HNRNPK	HSPD1	IGF1R	IMP3	IRS2	KANSL1	KANSL2	KRAS	LRPPRC	MED17	MED28	MEN1	MRPL10	MRPL3	MRPS2	MRPS25	MRPS35	MRPS9	MRRF	MTIF2	NCL	NOP14	NOP2	NOP58	NUPL2	PCF11	POLR1B	POLR1D
MPS-1-IN-1	na	BAZ2A	CPSF3	CPSF6	DDX31	DHX15	DIS3	EEF2	EIF3A	EIF3E	EIF3J	EIF3M	EIF4B	EXOSC2	FZD3	GTF2F2	GTF3C5	HNRNPA0	HNRNPA2B1	HNRNPDL	HNRNPH1	HNRNPK	HSPD1	IGF1R	IMP3	IRS2	KANSL1	KANSL2	KRAS	LRPPRC	MED17	MED28	MEN1	MRPL10	MRPL3	MRPS2	MRPS25	MRPS35	MRPS9	MRRF	MTIF2	NCL	NOP14	NOP2	NOP58	NUPL2	PCF11	POLR1B	POLR1D
MPS-1-IN-1_md2	module_2	AEBP2	AQR	ASXL2	CCND2	CDK13	CHTOP	CLNS1A	COX5A	EED	JAG2	MAML1	MAP2K6	MAP2K7	MRPS31	MYC	PPA2	PTCD3	RNPC3	STK24	SYK	SYTL1	ZNF830
Masitinib	na	ANK2	CACNA1A	DOK1	FARS2	FGFR1	GRIA2	GRIK1	ITGA10	ITGA11	JAM2	KIFAP3	NOX3	PLXNA4	PRKG1	SMPD1	SNAP25
Midostaurin	na	ABL1	ABLIM3	ACTB	ACTG1	ACTN1	ACTR1A	ADAM17	ANKRD1	ANXA1	ANXA2	ANXA6	APBB1IP	ATF2	BDNF	BIN1	BIRC2	CAPZB	CD151	CD44	CHD9	CHPF2	COL12A1	COL13A1	COL18A1	COL1A1	COL1A2	COL3A1	COL4A1	COL4A2	COL5A1	COL5A2	COL6A2	COL6A3	COL7A1	COL8A1	CREB3	CXCL12	DCN	DNM1	DOK1	DST	EPHB2	ERAP1	ERAP2	ERBIN	F2R	F2RL2	FAS
Midostaurin	na	ABL1	ABLIM3	ACTB	ACTG1	ACTN1	ACTR1A	ADAM17	ANKRD1	ANXA1	ANXA2	ANXA6	APBB1IP	ATF2	BDNF	BIN1	BIRC2	CAPZB	CD151	CD44	CHD9	CHPF2	COL12A1	COL13A1	COL18A1	COL1A1	COL1A2	COL3A1	COL4A1	COL4A2	COL5A1	COL5A2	COL6A2	COL6A3	COL7A1	COL8A1	CREB3	CXCL12	DCN	DNM1	DOK1	DST	EPHB2	ERAP1	ERAP2	ERBIN	F2R	F2RL2	FAS
Midostaurin_md2	module_2	ACKR4	ADAMTS3	ADAMTS5	CDH11	CDH6	CEBPD	CYBRD1	FGF2	FZD2	GDF5	GOPC	KCND1	MMP24	NECTIN2	NECTIN3	NOTCH2	NR3C1	PARD3	POFUT2	RUNX2	SMAD3	SMAD7	STX4	TCF4	TNFAIP6	TNFRSF11B	WNT2B	WNT5A	WNT5B
MitomycinC	na	ANP32A	BMS1	CDC37L1	CHRNA5	CHTOP	CSNK2A2	DDX21	DDX31	DIS3	DNAJA1	EIF2S3	EIF3J	EXOSC2	EXOSC8	HSPA4L	INO80	MAGOH	MCL1	METAP1	METAP2	MRPL42	MRPS27	MRPS31	NAT10	NIP7	NOB1	NOC3L	NOP2	NUDT21	NUP160	NUP54	PHB2	PHF5A	PPIL1	PSMA4	PUM3	RCL1	RIOK1	RPL18	RPL37	RPL7L1	RSL24D1	RUVBL1	SERBP1	SSRP1	STK24	STK26	SURF6
NG-25	na	BTK	BTLA	CAMK4	CD19	CD72	CD80	CD86	DOCK2	DOCK3	EPHB1	ERBB4	FCER2	FCGR2B	FGFR1	FGR	FIG4	IL12B	LTA	PIK3CD	PILRA	PRKCB	PTPRC	TNFRSF13B	TNFRSF17	TRAT1
NPK76-II-72-1	na	ACTL6A	AGO3	AMD1	ANAPC7	ANP32A	AQR	ARG2	ARID1A	ARID1B	ARID2	ATR	BCAS2	BLM	BMS1	CCAR1	CCNC	CCT2	CCT3	CCT7	CDC7	CHEK1	CNOT10	CNOT6	CNOT9	CPSF3	CUL3	CWC22	DDX18	DDX20	DDX5	DHX36	DHX9	DKC1	DNA2	DNAJA1	DPY30	E2F2	EED	EHMT1	ELAVL1	EXOSC2	EXOSC9	EZH2	FBL	GEMIN2	GEN1	GLMN	GRPEL2
NPK76-II-72-1	na	ACTL6A	AGO3	AMD1	ANAPC7	ANP32A	AQR	ARG2	ARID1A	ARID1B	ARID2	ATR	BCAS2	BLM	BMS1	CCAR1	CCNC	CCT2	CCT3	CCT7	CDC7	CHEK1	CNOT10	CNOT6	CNOT9	CPSF3	CUL3	CWC22	DDX18	DDX20	DDX5	DHX36	DHX9	DKC1	DNA2	DNAJA1	DPY30	E2F2	EED	EHMT1	ELAVL1	EXOSC2	EXOSC9	EZH2	FBL	GEMIN2	GEN1	GLMN	GRPEL2
NPK76-II-72-1_md2	module_2	ABCE1	ALMS1	BDP1	CHTOP	COPS7B	CUL5	DHX15	EIF3J	ELOA	FGF19	FGF9	GTF3C5	IMP3	LETM1	MAGOH	MRPL3	MRPL42	MRPL47	MRPS9	POLR2B	POLR3B	PUM1	RNGTT	RPL35A	RPRD1A	RPRD2	RPS12	RPS27A	RPS28	RPS3A	SERBP1	SH3GL2	SLC12A1	SNAP91	SUMO1	TOPORS	TUBGCP4	UPF3B	USP1	USP34	VTA1	WNK2
NSC-207895	na	ARHGAP19	ATP12A	AURKC	BTK	BTRC	CBL	CDC25A	CDC40	CDC42	CDCA8	CENPI	CSNK2A1	DCLRE1B	DDX20	DNA2	DOT1L	ELAVL1	EPS15	ERCC6L	FANCD2	FBXO5	FGR	GNB4	HSP90AB1	IGF2BP1	ITGAM	ITSN1	LIN28A	MAGOH	MSH6	NUP107	NUP153	NUP37	ORC3	POU5F1	PPP1CC	PPP2R1B	PPP2R3B	PPP3CB	PRDM14	PRKAR2A	PRKCB	PRKG1	PSMA8	PTBP1	PTPRC	SGO2	SIRT1
NSC-207895	na	ARHGAP19	ATP12A	AURKC	BTK	BTRC	CBL	CDC25A	CDC40	CDC42	CDCA8	CENPI	CSNK2A1	DCLRE1B	DDX20	DNA2	DOT1L	ELAVL1	EPS15	ERCC6L	FANCD2	FBXO5	FGR	GNB4	HSP90AB1	IGF2BP1	ITGAM	ITSN1	LIN28A	MAGOH	MSH6	NUP107	NUP153	NUP37	ORC3	POU5F1	PPP1CC	PPP2R1B	PPP2R3B	PPP3CB	PRDM14	PRKAR2A	PRKCB	PRKG1	PSMA8	PTBP1	PTPRC	SGO2	SIRT1
NSC-207895_md2	module_2	ACTN2	ACTR1A	CAMK4	CCT4	CCT8	CEP78	CLASP2	COL11A1	DDX4	DNMT3B	DNMT3L	DYNC1LI1	FKBP1B	HRC	KDM2B	KDM4D	KIF5A	MED16	MTF2	MYH10	NCAPG	NR2C1	PAK5	PDCD11	POLR3F	RBPJ	RNGTT	SAFB	SKA1	SLN	SMARCC1	SMS	SYCP3	TAF5	TEX15	TUBB2A	TUBB2B	WDR75	ZNF382
NU-7441	na	ADAMTS9	ANGPTL4	CXCL1	CXCL2	CXCL5	CXCL8	DDX4	ERCC1	FGFR1OP2	FKBP1A	FLT1	FTO	GLS	GRM3	IFITM2	IGF2BP1	LPAR1	LRRFIP1	MOV10	NF2	NFKB2	PFDN4	RHOC	SORBS3	STARD8	STAT4	TAF13	TNFAIP6	TNIP1	TRIP10
NU-7441	na	ADAMTS9	ANGPTL4	CXCL1	CXCL2	CXCL5	CXCL8	DDX4	ERCC1	FGFR1OP2	FKBP1A	FLT1	FTO	GLS	GRM3	IFITM2	IGF2BP1	LPAR1	LRRFIP1	MOV10	NF2	NFKB2	PFDN4	RHOC	SORBS3	STARD8	STAT4	TAF13	TNFAIP6	TNIP1	TRIP10
NU-7441_md2	module_2	ARSE	BNIP3L	BST1	CAV1	CD40	GALK1	GLRX	IL6	MAP4K4	MATN3	NRAS	OPCML	PCOLCE2	PFKFB3	SLN	TNFRSF10D	TNFSF9	UGT2B7
NVP-BEZ235	na	ABL1	ABLIM3	ACTR1A	AP2S1	APP	ARFGAP3	ARHGAP10	ARHGAP24	ARHGEF6	B4GAT1	BDNF	BET1L	BIRC2	BNIP3L	C3	CAV1	CCNH	CD151	CDK6	CHMP6	CHMP7	CHN1	COL12A1	COL13A1	COL3A1	COL8A1	COPB1	CTGF	CXCL5	CXCL8	CYLD	DCTN6	DNM1	DOCK1	DPH3	DUSP3	EFNA5	ELP3	EPHA5	EPHA7	ERCC1	EXOC2	F2RL2	FER	FGF1	FGF2	FGFR1	GIT2
NVP-BHG712	na	A2M	ABCB4	ABR	ACP5	ACSL3	ANK2	ARHGAP12	ARHGEF11	ARHGEF2	ARSB	ARSG	ASXL2	ATIC	ATP1A1	ATP6V0A1	ATP6V1C1	BCL2	CABLES1	CACNA1S	CAMK4	CCNG1	CLCN3	CLCN7	COL9A3	CTNNB1	CTSK	CYP17A1	CYP27A1	CYP7B1	DBH	DHFR2	EIF4B	ENTPD6	ERBB3	FARP2	FCGR2A	FYN	GGT7	GLUD2	GPAT4	HDAC4	HERC2	HLA-DPB1	HLA-DRA	HSPA12A	IL12RB2	IL6R	INPP4B
Nutlin-3a	na	ABL2	ABR	ACTN2	ADAM2	ARHGAP24	ARHGEF11	ARSB	ARSE	B4GALT6	BAX	BBS10	BBS4	CARM1	COL4A1	COL4A2	CRADD	CRK	DCN	DDB2	DOCK1	DOK1	FAS	FER	FGF1	FGF10	FLT1	GIT2	GNS	GPC6	GTF2F2	GTF2H1	HEXB	HGSNAT	HIPK2	HSPA12A	HSPA4	ITGA4	ITGA7	KAT2B	KDSR	LAMA1	LAMC1	LSM10	MDM4	MED4	MITF	MYF5	NAGLU
Nutlin-3a	na	ABL2	ABR	ACTN2	ADAM2	ARHGAP24	ARHGEF11	ARSB	ARSE	B4GALT6	BAX	BBS10	BBS4	CARM1	COL4A1	COL4A2	CRADD	CRK	DCN	DDB2	DOCK1	DOK1	FAS	FER	FGF1	FGF10	FLT1	GIT2	GNS	GPC6	GTF2F2	GTF2H1	HEXB	HGSNAT	HIPK2	HSPA12A	HSPA4	ITGA4	ITGA7	KAT2B	KDSR	LAMA1	LAMC1	LSM10	MDM4	MED4	MITF	MYF5	NAGLU
Nutlin-3a_md2	module_2	ABRAXAS1	AEN	ATP5F1A	ATP5F1D	CADM1	CADM3	CCNG1	CD63	CDC16	DDX4	DIMT1	EGLN1	GSPT2	HABP4	HIF1AN	HOXB2	HOXC4	KANK1	KRR1	LARS2	LIN28A	MMP24	MRPS27	MYL5	NARS	NECTIN3	NIFK	NPR2	PCSK5	PLK3	POU5F1	PRDM14	PRKD1	PRMT2	RIOK2	RPL15	RPL22L1	RPS23	RPS27L	RPS3A	RRM2B	SMG6	SORBS3	SYCP3	TERF1	TNKS	TRIAP1	TSNAX
OSI-027	na	ACTN2	ARID1B	BRF2	EIF4EBP1	HOXA2	KAT6A	KCNC2	LSM1	MDC1	MED16	NPHP1	SUGP1
OSI-906	na	ACTC1	FURIN	GLCE	HIST1H2AA	HIST1H2BA	HS6ST2	IGF2	IHH	IRS2	KAT2A	LRP5	MYL4	MYOD1	MYOG	SP1	TNNI1	WNT11	ZBTB16
OSU-03012	na	ATF1	ATF4	BID	CD2BP2	CDC37L1	CDK9	CSNK2A1	CSNK2A2	EEF1A1	EIF4A2	ELP1	ELP4	FAU	IARS	JUNB	KAT8	MAGOH	MAP2K7	MCL1	MCRS1	MSL2	OGT	POLL	PPP1R15A	PSAT1	RACK1	RPL11	RPL13A	RPL18	RPL27	RPL35	RPL37	RPL5	RPL8	RPL9	RPL9P7	RPL9P8	RPL9P9	RPS11	RPS12	RPS15A	RPS18	RPS4X	RPS6	RSL24D1	SARS	SLC38A2	SNRPB
OSU-03012	na	ATF1	ATF4	BID	CD2BP2	CDC37L1	CDK9	CSNK2A1	CSNK2A2	EEF1A1	EIF4A2	ELP1	ELP4	FAU	IARS	JUNB	KAT8	MAGOH	MAP2K7	MCL1	MCRS1	MSL2	OGT	POLL	PPP1R15A	PSAT1	RACK1	RPL11	RPL13A	RPL18	RPL27	RPL35	RPL37	RPL5	RPL8	RPL9	RPL9P7	RPL9P8	RPL9P9	RPS11	RPS12	RPS15A	RPS18	RPS4X	RPS6	RSL24D1	SARS	SLC38A2	SNRPB
OSU-03012_md2	module_2	EGR1	GLUD1	JMJD1C	KDM1A	LAMB3	LCOR	MAT2B	MED30	MMP13	PCGF6	PRKCQ	RBCK1	SALL4	SNCAIP	UHRF2
ObatoclaxMesylate	na	AK2	AKT3	AMOTL1	CCT6A	CCT7	CHD4	CLP1	CSNK2A1	CSNK2A2	DIMT1	DVL2	EIF2S2	EIF3D	EIF3E	EIF3G	EIF3I	EIF3M	ESF1	ETF1	FBXW11	GTF3C4	HDAC1	HMGA1	HSP90AB1	IMPDH2	MAGOH	MYBBP1A	MYH10	NAT10	NCBP2	NOB1	NOC2L	NUP160	PA2G4	PDCD11	PFDN2	PHB2	PHF5A	PLXNA1	POLR1B	POLR3D	PRKAG1	RACK1	REXO4	RNF2	RPL11	RPL18	RPL24
Olaparib	na	ARHGEF6	BCAN	COL11A1	COL3A1	COL4A1	COL4A2	COL5A2	COL6A1	COL6A3	DNM1	EFNB3	HTR1F	IAPP	ITGA7	LAMC1	LUM	MFGE8	MYH10	MYH6	MYLK	NID1	OPHN1	RAP1B	SFRP1	SFRP2	TCF7L1	TEK	TGFB1I1
Olaparib_rescreen_	na	ADHFE1	AGO3	AOX1	AP2A2	B4GAT1	BSG	C3	CCDC8	CCKBR	CDC37L1	CEP63	CUL7	EBI3	ESD	FBXL5	GNB4	GOPC	HSP90B1	IFITM2	IL11RA	IL6	JAK2	LIN28A	MMP2	MOV10	MRPL39	MTA3	MYH10	MYH6	OBSL1	PAFAH1B1	PDIA5	PDIA6	PGM1	PLAU	PPP1R12A	PPP3CB	PRDX6	REEP2	RIMKLB	S1PR3	SALL4	SEPT7	SFRP1	SHC1	TCF7L1	TEK	TRIM71
PD-0325901	na	A2M	ABL2	ABR	ACP5	APOD	ARAP1	ARAP3	ARHGAP5	ARHGDIA	ARHGEF1	ARHGEF11	ARPC1B	BECN1	CD63	CDC16	CLCN7	CST3	CSTB	CTSH	CTSK	ERBB3	EXOC4	FCER1G	FGD4	GRN	GSN	IFNGR2	IL12RB2	IL24	IL6R	IRS2	ITGA6	ITGA7	ITGA9	ITGB5	LCP2	LEF1	LGALS3	LGALS3BP	LPCAT2	LYZ	MAP1LC3B	MEF2D	MITF	NCK2	NEDD4L	NFATC2	NR1H2
PD-0325901	na	A2M	ABL2	ABR	ACP5	APOD	ARAP1	ARAP3	ARHGAP5	ARHGDIA	ARHGEF1	ARHGEF11	ARPC1B	BECN1	CD63	CDC16	CLCN7	CST3	CSTB	CTSH	CTSK	ERBB3	EXOC4	FCER1G	FGD4	GRN	GSN	IFNGR2	IL12RB2	IL24	IL6R	IRS2	ITGA6	ITGA7	ITGA9	ITGB5	LCP2	LEF1	LGALS3	LGALS3BP	LPCAT2	LYZ	MAP1LC3B	MEF2D	MITF	NCK2	NEDD4L	NFATC2	NR1H2
PD-0325901_md2	module_2	ACAA1	ACSBG1	ACSL3	ADCY1	AGPAT2	ALAS1	ALDH1A3	APEH	ARSB	ARSG	ASAH1	ATP1A1	ATP1B3	ATP6V0A4	ATP6V0D2	ATP6V1C1	ATP6V1E1	ATP6V1F	ATP6V1H	B2M	B4GALT6	BCAN	CASP4	CASP8	CCND1	CCNH	CD44	CDK2	CPOX	CRYL1	CSK	CTNNB1	CXCL1	CYP27A1	DGKG	DNAJA4	DUSP4	DUSP6	EHHADH	ENTPD6	ETS1	FABP7	FAH	FHL2	FLT1	FOXO1	GAD1	GALE
PD-0332991	na	ADORA2B	ADRB2	ANXA1	ANXA2	B2M	BDNF	BIRC2	CAPN2	CAST	CAV1	CCNH	CD151	CD44	CDK6	CRADD	CSNK2A2	CYLD	E2F7	EGFR	EPHB2	ERAP1	ERAP2	ETS1	EXOC1	EXOC7	F2R	F2RL2	GRK5	GRN	GTF2F2	GTF2H1	HBEGF	HLA-B	HRH1	HSPG2	IFI35	IFITM3	IL15	IL15RA	IL1B	IL6ST	IL7	IRF2	IRS1	ITGA3	ITM2B	JAK1	LPAR1
PD-0332991	na	ADORA2B	ADRB2	ANXA1	ANXA2	B2M	BDNF	BIRC2	CAPN2	CAST	CAV1	CCNH	CD151	CD44	CDK6	CRADD	CSNK2A2	CYLD	E2F7	EGFR	EPHB2	ERAP1	ERAP2	ETS1	EXOC1	EXOC7	F2R	F2RL2	GRK5	GRN	GTF2F2	GTF2H1	HBEGF	HLA-B	HRH1	HSPG2	IFI35	IFITM3	IL15	IL15RA	IL1B	IL6ST	IL7	IRF2	IRS1	ITGA3	ITM2B	JAK1	LPAR1
PD-0332991_md2	module_2	ABCA1	ABRAXAS1	AMPD3	BABAM2	CATSPER1	CCND1	CHD9	COQ10B	CXCL8	DHX58	DLG1	DPYD	DPYSL3	EXOSC1	FBXW8	FHL2	FOXK1	GADD45A	IRAK2	MAP1LC3B	MAT2B	NLRP1	NLRP3	NR1H2	NT5C	RNF135	SMAD3	TNFSF9	TUBG2	UBE2L6	WWTR1	XRCC4
PFI-1	na	ADAMTS1	ATP2A2	CD44	COL16A1	COL4A1	COL4A2	CSPG4	EXT1	EXT2	FKBP1B	GAST	GNAI1	HSPG2	LAMA1	LAMC1	LPAR6	MMP14	MYH10	PARVA	RXRG	TRPV4
PHA-793887	na	ADAM8	AGO2	AGO4	CCAR1	CNOT6	CPT2	DDX21	DDX5	DHX15	DLG3	EIF3E	EIF4A2	FAU	FOXH1	HNRNPK	JAG2	KLF4	LIN28A	MAML1	MED17	MED30	MTA1	MYO6	PATJ	PCF11	PCGF6	POU5F1	PRDM14	RACK1	RPL30	RPL34	RPL35A	RPL37	RPL37A	RPL5	RPL8	RPL9	RPL9P7	RPL9P8	RPL9P9	RPS12	RPS6	SRRM1	SRSF5	TCEA1	TGS1	U2AF1
PIK-93	na	ATP13A5	BTK	CD19	CD72	CD80	CD86	FGR	HEY2	KAT6B	PBRM1	PLEK	PRKCB	PTPRC	SLC12A1	TLR7	TRAT1
PLX4720	na	A2M	ABR	ACO2	ACOT12	ACP5	ACSBG1	ACSL1	ACSL3	ACSS1	AGPAT1	ANK2	AP1S1	AP2S1	APOD	APOE	ARFGAP1	ARHGDIA	ARHGEF11	ARHGEF2	ARPC1B	ASAH1	ASPA	ATP6V0A1	ATP6V0A4	ATP6V0D2	ATP6V1C1	ATP6V1E1	ATP6V1F	ATP6V1H	BECN1	CD244	CD74	CERK	CHCHD3	CHCHD6	CLCN7	COL15A1	COL9A3	COPA	COPG1	CRYL1	CSF3	CSK	CSTB	CTLA4	CTSK	CYP2U1	DGKI
PLX4720	na	A2M	ABR	ACO2	ACOT12	ACP5	ACSBG1	ACSL1	ACSL3	ACSS1	AGPAT1	ANK2	AP1S1	AP2S1	APOD	APOE	ARFGAP1	ARHGDIA	ARHGEF11	ARHGEF2	ARPC1B	ASAH1	ASPA	ATP6V0A1	ATP6V0A4	ATP6V0D2	ATP6V1C1	ATP6V1E1	ATP6V1F	ATP6V1H	BECN1	CD244	CD74	CERK	CHCHD3	CHCHD6	CLCN7	COL15A1	COL9A3	COPA	COPG1	CRYL1	CSF3	CSK	CSTB	CTLA4	CTSK	CYP2U1	DGKI
PLX4720_md2	module_2	ACOT8	ADAMTS3	ADAMTS4	ADCY1	ADCY2	ALAS1	ARSB	ARSG	ATP1A1	B3GAT1	B3GAT3	B4GALT6	B4GAT1	BAMBI	BCAN	BST1	C3AR1	CABLES1	CAMK4	CCNG1	CD22	CDC16	CDK2	CDK5	CHST10	CHSY3	CTNNB1	CXCL1	CYP17A1	CYP27A1	CYP7B1	DVL2	ERCC1	FKBP1A	FYN	GRB10	HDAC4	HEXB	HEY1	HEY2	ICAM1	IL2RB	KAT2B	KDR	KIF13B	LINGO1	LPL	MAG
PLX4720_rescreen_	na	A2M	ABCG5	ABL2	ABR	ACO2	ACOT12	ACP5	ACSBG1	ACSL3	ACSS1	ADAMTS4	AGPAT1	AK2	ALDH1B1	ALDH9A1	AP1S1	AP2S1	APOD	APOE	ARAP3	ARFGAP1	ARHGAP15	ARHGAP24	ARHGDIA	ARHGEF11	ARHGEF2	ARHGEF6	ARPC1A	ARPC1B	ARSB	ASAH1	ASPA	ATP13A2	ATP6V0A1	ATP6V0A4	ATP6V0D2	ATP6V1C1	ATP6V1E1	ATP6V1F	ATP6V1H	B3GAT3	B4GALT6	BCAN	BECN1	BLK	CABLES1	CD74	CERK
PLX4720_rescreen_	na	A2M	ABCG5	ABL2	ABR	ACO2	ACOT12	ACP5	ACSBG1	ACSL3	ACSS1	ADAMTS4	AGPAT1	AK2	ALDH1B1	ALDH9A1	AP1S1	AP2S1	APOD	APOE	ARAP3	ARFGAP1	ARHGAP15	ARHGAP24	ARHGDIA	ARHGEF11	ARHGEF2	ARHGEF6	ARPC1A	ARPC1B	ARSB	ASAH1	ASPA	ATP13A2	ATP6V0A1	ATP6V0A4	ATP6V0D2	ATP6V1C1	ATP6V1E1	ATP6V1F	ATP6V1H	B3GAT3	B4GALT6	BCAN	BECN1	BLK	CABLES1	CD74	CERK
PLX4720_rescreen__md2	module_2	ADARB1	ADCY1	ADCY2	AKT3	ANK2	ATP1A1	ATP7A	AZIN2	B3GAT1	B4GAT1	BAMBI	BST1	C3AR1	CACNA1S	CAMK4	CCNG1	CD22	CD81	CD96	CDC16	CDK2	CDK5	CHST10	CSK	CXCL1	DGUOK	EPS15	ERCC1	FKBP1A	FLT1	FN1	FZD7	GRAP2	GRB10	HEY1	HEY2	HIPK2	HTN1	ICAM1	IL2RB	ITGA4	ITGB5	ITPKB	ITPR1	KAT2B	KDR	LUM	MAGI2
Pazopanib	na	ACTR1A	ADAMTS2	ADAMTS3	ADAMTS5	ADD1	AGT	ANGPT1	ANK2	ANPEP	ANXA6	APH1B	APOB	ARHGAP35	ATF2	B4GAT1	BACE1	BOC	CACNA1C	CACNA1H	CALR	CAPZB	CBX5	CHD9	COL18A1	COL1A1	COL1A2	COL3A1	COL5A1	COL5A2	COL6A1	COL6A2	COL6A3	CXCL12	CXXC5	DCN	F2	FBLN5	FGF10	FGF7	GALNT15	GDF5	GPC6	GRIA1	GRIA2	HABP4	ITGA11	ITGA5	ITGA8
Phenformin	na	ADCY1	ADCY2	ADSSL1	ALDH3B2	AXIN2	CALML5	CCL25	COP1	CTNNB1	DBH	DOT1L	EDEM3	ESRRA	ESRRG	FZD3	FZD9	GGCT	GGT6	HIST1H4A	HIST1H4B	HIST1H4C	HIST1H4D	HIST1H4E	HIST1H4F	HIST1H4H	HIST1H4I	HIST1H4J	HIST1H4K	HIST1H4L	HIST2H4A	HIST2H4B	HIST3H2A	HIST4H4	INPP5J	KDM7A	KREMEN2	LEF1	MRPL34	MRPL41	MYB	NR2E1	NR4A2	NRTN	PAN2	PDE4C	POLR1C	PPP1R1B	PTCRA
QL-X-138	na	AR	ARID1B	CDK19	COL10A1	ENPP1	FMO3	GNMT	GPC4	IL12B	ITGA11	MED16	MED24	ORMDL3	PIAS3	RAB9B	RORB	RRAGB	SAP30	SIRT4	SMARCE1	TAF9B	TGFB3	TYK2
QL-XI-92	na	BDNF	COL8A1	DACT1	DPYSL3	F2R	FGFR1	FOXG1	HLA-C	IFNAR1	IL11	ITGA11	KIF5A	KIFAP3	MAPK11	MMP2	NCAM1	NKX3-2	PDGFC	PDGFRA	PDGFRB	PKD1	PPFIA2	RASA1	SFRP2	TCF4	TLE4	TLN1
QS11	na	CHTOP	CLDN2	CNOT10	CSNK2A1	DGCR8	EIF3D	EIF3L	EXOSC5	GEMIN7	IAPP	IARS	OXGR1	PFDN2	PHB2	RPL18	RPS11	RPS6	RSL24D1	THRAP3	VARS
RDEA119	na	A2M	ABR	ACP5	ACSBG1	ACSL3	ACSL5	AGPAT2	AHR	ANXA2	AOC1	AP1S1	APOD	ARAP1	ARHGAP12	ARHGAP26	ARHGAP5	ARHGDIA	ARHGEF1	ARHGEF11	ARNT2	ARPC1B	ARSB	ATP6V0A1	ATP6V0D2	ATP6V1C1	ATP6V1E1	ATP6V1H	B2M	BCAN	BCAP31	BECN1	CD44	CD63	CD74	CHPF	CHSY3	CLCN7	COL16A1	COL17A1	COL9A3	CSK	CST3	CSTB	CTSH	CTSK	CTTN	CXCL8	CYP2S1
RDEA119	na	A2M	ABR	ACP5	ACSBG1	ACSL3	ACSL5	AGPAT2	AHR	ANXA2	AOC1	AP1S1	APOD	ARAP1	ARHGAP12	ARHGAP26	ARHGAP5	ARHGDIA	ARHGEF1	ARHGEF11	ARNT2	ARPC1B	ARSB	ATP6V0A1	ATP6V0D2	ATP6V1C1	ATP6V1E1	ATP6V1H	B2M	BCAN	BCAP31	BECN1	CD44	CD63	CD74	CHPF	CHSY3	CLCN7	COL16A1	COL17A1	COL9A3	CSK	CST3	CSTB	CTSH	CTSK	CTTN	CXCL8	CYP2S1
RDEA119_md2	module_2	ABCB4	AK3	ASAH1	ATP1A1	ATP1B3	B4GALT6	BAX	BHLHE40	CASP4	CASP8	CCND1	CCNH	CDK2	CDK6	CFTR	CLCN3	CTNNB1	DNAJA4	DNAJB1	ENTPD6	ERCC1	FLT1	GALE	GLB1	GMPR	GTF2F2	HELZ2	HES5	HEXB	HEY1	HMGA1	HSPA12A	HSPA6	KAT2B	KDSR	LIG4	LTBR	MAP2K3	MED15	MET	MLX	MYC	NCSTN	NPL	PLEC	POLR1D	POLR3G	PPARA
RDEA119_rescreen_	na	A2M	ABCG5	ABR	ACAA1	ACOT8	ACP5	ACSS1	ALDH1A3	AP1S1	APOD	ARAP1	ARAP3	ARHGAP12	ARHGAP5	ARHGDIA	ARHGEF11	ARHGEF2	ARPC1B	ASPA	ATP6V0A1	ATP6V0A4	ATP6V0D2	ATP6V1C1	ATP6V1E1	ATP6V1F	ATP6V1H	BECN1	CAT	CD63	CD74	CLCN7	CRYL1	CSF3	CST3	CSTB	CTLA4	CTSH	CTSK	CYP17A1	CYP27A1	CYP2U1	CYP3A5	CYP7B1	DEPDC7	DLC1	ENPP2	ERBB3	ESRRA
RDEA119_rescreen_	na	A2M	ABCG5	ABR	ACAA1	ACOT8	ACP5	ACSS1	ALDH1A3	AP1S1	APOD	ARAP1	ARAP3	ARHGAP12	ARHGAP5	ARHGDIA	ARHGEF11	ARHGEF2	ARPC1B	ASPA	ATP6V0A1	ATP6V0A4	ATP6V0D2	ATP6V1C1	ATP6V1E1	ATP6V1F	ATP6V1H	BECN1	CAT	CD63	CD74	CLCN7	CRYL1	CSF3	CST3	CSTB	CTLA4	CTSH	CTSK	CYP17A1	CYP27A1	CYP2U1	CYP3A5	CYP7B1	DEPDC7	DLC1	ENPP2	ERBB3	ESRRA
RDEA119_rescreen__md2	module_2	ACSBG1	ACSL3	ACTG1	AHR	APOE	ARFGAP1	ARNT2	ARSB	ARSG	ASAH1	B3GAT1	B4GALT6	BAX	BCAN	CASP4	CASP8	CCND1	CCNG1	CD22	CDC16	CDK2	CDK6	CHCHD3	CHCHD6	CHPF	CHST10	COL16A1	COL9A3	CSK	CTNNB1	CTTN	CXCL8	DDB2	DGKI	ECM1	EDEM1	EDEM2	ERCC1	ETS1	FHL2	FOSL1	FOXO1	GAB2	GBA	GLB1	GLCE	GM2A	GTF2H1
RO-3306	na	ALCAM	BHLHE40	BIRC2	CASP1	CAV1	DLL1	EGFR	GBP1	HLA-B	IFITM3	IFNGR1	IL4R	IRF1	IRF6	MMP2	MT2A	NGF	NR3C1	NRG1	OLR1	PRKCI	REL	RNASEL	SLC15A3	SMAD3	STAT3	STAT4	VCAM1	WNT4	WNT5A	WNT5B
SB-505124	na	ABCC8	ABCC9	COL11A1	FEV	GAST	GCG	GHRL	GLI1	GPBAR1	IAPP	ITGA7	KCNJ8	NKX2-2	PAX4	PAX6	SLC2A2	TTR	UTS2B
SB-715992	na	ARID1B	ASF1A	ASNS	ATF4	ATG5	BMS1	BRD2	CCND2	CEP70	DDX5	EIF3J	FBXL4	GTF3C5	HDAC2	HDAC8	IARS	INO80	JMJD1C	KDM4A	KDM4D	KYAT3	LIG4	LTV1	MAML1	MED17	MED27	MFAP1	MSL2	NAE1	NUP188	OGT	ORC3	PHF21A	PKP1	PLRG1	PPIE	RAD17	RIOK1	RPA2	RPL37A	RPS4X	RTF1	S100A7	SARS	SIRT1	SIRT4	SMAD1	SNAPC4
SB216763	na	ACTN4	ARHGAP29	BET1	BIRC3	CD151	CFLAR	CHPF2	COL12A1	COL8A1	CST3	DNM1	ERAP1	ERAP2	F2R	GBP1	GBP2	HLA-B	HRH1	HSPG2	IFITM3	IL6ST	IL7	IL7R	IRF1	ITGA3	ITGAV	ITGB5	LAMB2	MSR1	MYH9	NR3C1	P4HA2	PLAUR	PML	RHOC	S1PR3	SHC1	SUCNR1	SYNJ2	TGFB2	TGFBR2	TMED9	TNIP1	TYROBP	VCAM1
SB52334	na	ACSBG1	ACSL3	ADCY1	ALG6	AMPH	AR	ARSB	ARSG	ATP6V0A4	ATP6V0B	ATP6V1C1	ATP6V1F	ATP6V1G1	B3GAT1	BCAN	BCHE	BCL2	BTK	CABLES1	CD19	CD22	CDK2	CDK5	CDON	CDS2	CLCN3	CLTC	CNTFR	CSNK2A1	CTSF	CYP27A1	CYP2U1	CYP7B1	DPYSL4	E2F6	EPHA3	FARP2	FCGR2A	FGR	GGA1	GJB1	GK	GLYATL1	GNMT	GPAT4	HERC2	HLA-DPB1	HTT
SB590885	na	A2M	ABCG5	ABR	ACO2	ACOT12	ACOT8	ACP5	ACSBG1	ACSL1	ACSL3	ACSS1	AGPAT1	ANK2	APOD	APOE	ARAP3	ARHGAP15	ARHGDIA	ARHGEF11	ARHGEF2	ARPC1A	ARPC1B	ASAH1	ASPA	ATP6V0A1	ATP6V0A4	ATP6V0B	ATP6V0D2	ATP6V1C1	ATP6V1E1	ATP6V1F	ATP6V1H	B3GAT3	BAAT	BECN1	CDS2	CERK	CHCHD3	CHCHD6	CHPT1	CLCN7	COX5A	COX5B	CRYL1	CST3	CSTB	CTSK	CYP2U1
SB590885	na	A2M	ABCG5	ABR	ACO2	ACOT12	ACOT8	ACP5	ACSBG1	ACSL1	ACSL3	ACSS1	AGPAT1	ANK2	APOD	APOE	ARAP3	ARHGAP15	ARHGDIA	ARHGEF11	ARHGEF2	ARPC1A	ARPC1B	ASAH1	ASPA	ATP6V0A1	ATP6V0A4	ATP6V0B	ATP6V0D2	ATP6V1C1	ATP6V1E1	ATP6V1F	ATP6V1H	B3GAT3	BAAT	BECN1	CDS2	CERK	CHCHD3	CHCHD6	CHPT1	CLCN7	COX5A	COX5B	CRYL1	CST3	CSTB	CTSK	CYP2U1
SB590885_md2	module_2	ACACB	ADCY1	ADCY2	ADCY8	AK2	ALAS1	AP1S1	ARFGAP1	ARSB	ARSG	ATP1A1	B3GAT1	B4GALT6	B4GAT1	BAMBI	BCAN	BTK	C3AR1	CABLES1	CAMK4	CBX4	CCNG1	CCR6	CDC16	CDK2	CDK5	CHPF	CHST10	COPG1	COPS8	CPOX	CSK	CTNNB1	DUSP4	DUSP6	DVL2	ENTPD6	EPHA3	EPS15	FKBP1A	FLT1	FYN	GM2A	GMPR	GRB10	GTF3A	HDAC4	HEXB
SN-38	na	ABL1	ADM	ADORA2B	ADRB2	AKT3	ANXA1	BDNF	BIRC2	C3	CASP1	CBL	CCL2	CDK9	CIAO2B	COL13A1	COL16A1	CTGF	CXCL1	CXCL2	CXCL8	CYLD	DNAJC8	EBI3	ERAP1	ETS1	FAS	FBXL5	FBXW11	GAS6	GNAI3	GTF2F2	HEBP1	HLA-B	HRH1	IFITM2	IL12A	IL15RA	IL1B	IL7	IL7R	ITGA3	JAK1	JAK2	KDSR	LPAR1	LRRFIP1	MAP2K4	MMP1
SN-38	na	ABL1	ADM	ADORA2B	ADRB2	AKT3	ANXA1	BDNF	BIRC2	C3	CASP1	CBL	CCL2	CDK9	CIAO2B	COL13A1	COL16A1	CTGF	CXCL1	CXCL2	CXCL8	CYLD	DNAJC8	EBI3	ERAP1	ETS1	FAS	FBXL5	FBXW11	GAS6	GNAI3	GTF2F2	HEBP1	HLA-B	HRH1	IFITM2	IL12A	IL15RA	IL1B	IL7	IL7R	ITGA3	JAK1	JAK2	KDSR	LPAR1	LRRFIP1	MAP2K4	MMP1
SN-38_md2	module_2	ACTR1A	ALDH7A1	AOX1	APBA2	BBS10	BBS2	BEGAIN	CDC37L1	COPS3	CSNK2A2	DARS	DDO	DIMT1	DLG1	DPYD	EEF1A1	EIF2S2	EIF3I	EIF3M	EIF5A2	ESD	EXOC2	GOPC	HSPA5	KLC1	KYAT1	LDHB	MYH9	MYO1C	NAGS	NDEL1	NEDD1	NFKB1	NIPAL4	NOC3L	PA2G4	PFN1	PGM1	PGM2	RACK1	REEP2	RELA	RPL13	RPL27	RPL31	RPL37	SERPINB6	SERPINB8
SNX-2112	na	BUB3	CCND2	CLK1	DDX5	DIS3	EXOSC9	FIP1L1	HDAC2	HNRNPA2B1	HNRNPD	HNRNPDL	HNRNPH3	INO80	ITGB3BP	LEO1	LSM6	MBD3	MED17	MYSM1	NUP188	NUP54	NXF1	PBRM1	PHC2	SAFB	SKI	SNRNP40	SNRPA1	SRRM1	SRSF11	SRSF4	THRAP3	TNRC6C	USP42
STF-62247	na	ABCB1	ACSM1	ACSM5	CASP6	CNDP2	CYP2C9	DDX41	DHCR24	EDN1	GLS	GSTA2	HNF4G	IL15	LGALS9	NR1H4	RIPK2	SLC6A3	TLR3	UGT2B7
T0901317	na	CDK19	DRD4	ELL	GTF2E1	IAPP	KMT2A	PIK3R5	POLR3A	PROK2	RPTOR	SIRT1	TADA2B	UBE2D1
TAK-715	na	ANK3	ARHGEF16	BLNK	CACNG3	CDH1	CDH3	CRB3	DLG3	DSC2	DSG2	DSP	EFNA1	EPCAM	EPHA1	EPHA7	GRB7	JUP	KLK7	KRT19	LYN	MTF2	MYO6	NFAM1	PARD6A	PATJ	PKP3	PPP2R5A	PRKCZ	PRSS8	PTPN6	SFN	SPTB	ST14	SYK	VAV1
TG101348	na	ACTG1	CDH11	CNN2	CXCL12	ERCC8	GALNT13	GCNT1	HNRNPK	ITGA11	PKD1	POU5F1	PRKCA	RPGRIP1L	SMARCE1	SUMO1
THZ-2-102-1	na	CHD4	DDX20	EEF2	FARSA	HDAC2	HNRNPA2B1	IMP3	KAT2A	KRI1	MRPL34	MRPL4	NAT10	NOP56	PARP1	POLR1B	RPS28	RPS4X	RUVBL1	UBA52	WDR3
THZ-2-102-1	na	CHD4	DDX20	EEF2	FARSA	HDAC2	HNRNPA2B1	IMP3	KAT2A	KRI1	MRPL34	MRPL4	NAT10	NOP56	PARP1	POLR1B	RPS28	RPS4X	RUVBL1	UBA52	WDR3
THZ-2-102-1_md2	module_2	ARHGEF4	ATP6V0B	CCND2	CRMP1	DHX36	DUT	ECSIT	ELAVL1	FAM98B	FZD3	GCG	GSK3B	IGFBP2	KHSRP	MEN1	MSI1	NDUFAF1	PODXL2	RGS16	ROBO2	SIKE1	SOCS2
THZ-2-49	na	ACADM	ADCY2	ATP6V0B	CD96	CHN1	CLDN10	CYP7B1	EGF	EIF2B3	GCG	GPAT4	HDAC4	HIPK2	ITGA9	ITK	LRP8	LRRTM1	MCF2L	MGST1	NDUFV3	PCYT1B	PHC2	PLB1	PNPLA3	SSR1	SSR2	STARD8	SUCLG2	SVIP
TL-1-85	na	ADCY2	BTK	CACNB4	CAMK4	CD19	CD22	CD72	CD80	CD86	CDC42	COL11A1	CR2	CTNNA2	CTSK	DOCK2	DOCK3	DOCK7	DPYSL4	EPHA3	EPHB1	FCER2	FCGR2B	FGFR1	FGR	FIG4	FLG	FYN	HOXB2	HVCN1	IL12B	IL21R	IL3RA	ITGA7	ITGA9	ITGAL	LCP2	MAP2K2	PIK3CD	PIKFYVE	PIP4K2A	PLCG1	PRKACB	PRKCB	PRKG1	PTPRC	RASGRP3	SHC4	TIAM2
TPCA-1	na	BTK	CCAR1	CCND2	CD19	CD80	CD86	FGF9	FGR	HNRNPD	HNRNPDL	HNRNPK	HSPD1	ITGB7	KHDRBS1	MYC	NCL	PHLPP1	PLEK	PPA1	PPA2	PRKCB	PTPRC	RBMX	SELL	SUMO1	TNFRSF17	TRAT1
TW37	na	ABL1	ABL2	ABRAXAS1	ACLY	ACTR1A	AGK	AHCYL1	AKT3	ALDH7A1	APBB1	APOE	ARNT	ATF2	ATP5F1A	BBS10	BLMH	BTRC	CAMK4	CCT7	CCT8	CDC23	CDC27	CENPH	CEP78	CLASP2	COPS2	COPS3	CRK	CSNK1E	CSNK2A2	CTPS1	DARS	DDX20	DIMT1	DNMT3B	DPH3	DPH5	DVL2	DYNC1LI1	EEF2	EGLN1	ENAH	ENO1	EPHA5	ERCC1	ESD	EVL	EXOC2
Temozolomide	na	ACKR3	CTSC	FPR1	FPR2	GREM2	IGFBP4	IL11	LHCGR	RGS18	TGFB1	TGFB2	TNFRSF9	TNFSF11	WIF1	WNT4	WNT5A
Temozolomide	na	ACKR3	CTSC	FPR1	FPR2	GREM2	IGFBP4	IL11	LHCGR	RGS18	TGFB1	TGFB2	TNFRSF9	TNFSF11	WIF1	WNT4	WNT5A
Temozolomide_md2	module_2	CDC27	CH25H	GPAM	KYNU	NLRP1	P4HA3	RB1CC1	SDR16C5	TNIP3	TRPA1	UBE2V2
Temsirolimus	na	ADAMTS5	AP2S1	AP3B1	ARHGEF25	ATP2B4	ATP6AP2	B4GAT1	BDKRB1	BDNF	CALR	CHMP7	COL12A1	COL13A1	COL3A1	COL8A1	COPS8	CXCL12	DCN	DEGS1	DOCK4	EPS15L1	F2RL2	FGF7	FPR1	FZD2	FZD8	GALNT10	GALNT15	GNB5	GNG11	GNG12	GPC6	GRK5	HS3ST3B1	HTR1F	IGFBP4	IL6	ITGA11	ITGB1	JAK2	LAMB2	LPAR1	LRP1	LUM	MMP3	NF2	NRG1	PCOLCE
Temsirolimus	na	ADAMTS5	AP2S1	AP3B1	ARHGEF25	ATP2B4	ATP6AP2	B4GAT1	BDKRB1	BDNF	CALR	CHMP7	COL12A1	COL13A1	COL3A1	COL8A1	COPS8	CXCL12	DCN	DEGS1	DOCK4	EPS15L1	F2RL2	FGF7	FPR1	FZD2	FZD8	GALNT10	GALNT15	GNB5	GNG11	GNG12	GPC6	GRK5	HS3ST3B1	HTR1F	IGFBP4	IL6	ITGA11	ITGB1	JAK2	LAMB2	LPAR1	LRP1	LUM	MMP3	NF2	NRG1	PCOLCE
Temsirolimus_md2	module_2	ABL1	ABLIM3	ACTR1A	ADD1	ADM	AHCYL1	ALS2	ANPEP	ARHGAP22	ARHGAP24	BAX	BBS9	BNIP3L	BPGM	CAPZB	CDC27	CEP63	CFH	CHD9	CHN1	CTSL	DCAF6	DCTN6	DLC1	DYNLL1	EEA1	EXOC2	FBXL5	FKBP1A	GNPDA2	GYS1	HLTF	KLHL22	LRRK2	MORF4L1	MPV17	NR1H2	NRBP1	NTNG1	P4HA2	P4HA3	PDCD1LG2	PFKFB3	PFN2	PGM3	PHF21A	PMM1	PPP2CB
Thapsigargin	na	ABCE1	BBS10	BCAS2	BMS1	BYSL	CCT5	CCT7	CCT8	CDC5L	CTPS1	CWC22	DDX10	DIMT1	DKC1	DNAJA1	EIF1B	EIF2S2	EIF3E	EIF3I	EIF3M	ETF1	GNL3	GRPEL2	HARS	HSPA4	HSPA9	IARS	IMPDH2	IPO5	KARS	KPNA4	LARS	LTV1	LYAR	MARS	MDN1	MRPS10	MRTO4	MTHFD2	NAT10	NOB1	NOC2L	NOC3L	NOP2	NUP155	NUP160	NUP54	NXF1
Thapsigargin	na	ABCE1	BBS10	BCAS2	BMS1	BYSL	CCT5	CCT7	CCT8	CDC5L	CTPS1	CWC22	DDX10	DIMT1	DKC1	DNAJA1	EIF1B	EIF2S2	EIF3E	EIF3I	EIF3M	ETF1	GNL3	GRPEL2	HARS	HSPA4	HSPA9	IARS	IMPDH2	IPO5	KARS	KPNA4	LARS	LTV1	LYAR	MARS	MDN1	MRPS10	MRTO4	MTHFD2	NAT10	NOB1	NOC2L	NOC3L	NOP2	NUP155	NUP160	NUP54	NXF1
Thapsigargin_md2	module_2	CBL	CDC23	CLP1	DDX21	FAF2	HSP90AB1	MAD2L2	MAGOH	MORF4L1	NRAS	PHB2	PRKAA1	RNF2	RNGTT	SSRP1	TRA2B	UBA2	UBA52	UBXN1	USP24	USP34	YES1
Trametinib	na	A2M	ABCG5	ABR	ACP5	ACSL3	ACSL5	ACTN1	ACVR1C	AGPAT2	ALDH1A3	AP1S1	APOD	ARAP1	ARAP3	ARHGAP12	ARHGAP5	ARHGDIA	ARHGEF1	ARHGEF11	ARHGEF2	ARPC1B	ARSB	ATP6V0D2	ATP6V1C1	ATP6V1H	B2M	BAX	BCAN	BECN1	BLK	CASP4	CASP8	CAV1	CD63	CD74	CDK7	CHMP2B	CHPF	CLCN7	COL16A1	COL17A1	COL9A3	CST3	CSTB	CTSH	CTSK	CTTN	CYP3A5
Trametinib	na	A2M	ABCG5	ABR	ACP5	ACSL3	ACSL5	ACTN1	ACVR1C	AGPAT2	ALDH1A3	AP1S1	APOD	ARAP1	ARAP3	ARHGAP12	ARHGAP5	ARHGDIA	ARHGEF1	ARHGEF11	ARHGEF2	ARPC1B	ARSB	ATP6V0D2	ATP6V1C1	ATP6V1H	B2M	BAX	BCAN	BECN1	BLK	CASP4	CASP8	CAV1	CD63	CD74	CDK7	CHMP2B	CHPF	CLCN7	COL16A1	COL17A1	COL9A3	CST3	CSTB	CTSH	CTSK	CTTN	CYP3A5
Trametinib_md2	module_2	ADCY1	ADORA2B	AHR	APOE	ATP1A1	ATP1B3	C3AR1	CABLES1	CAST	CCL20	CCND1	CCNG1	CCNH	CD44	CDK6	CSK	CTNNB1	CTNND1	CXCL1	CXCL2	CXCL8	DDB2	ERCC1	EREG	ETS1	F2RL1	FHL2	FLT1	FOXO1	GBP2	GLRX	GPR65	GTF2F2	HBEGF	HSPA12A	HSPA6	ICAM1	IFI35	IFIT3	IL1A	IL1B	IRAK2	ISG20	KAT2B	LEF1	LIF	LPAR6	MAP3K11
UNC0638	na	ADCY1	AKT3	ANK2	ARHGEF2	BBS9	C1GALT1	C3AR1	CAMK4	CD63	CEP63	COL15A1	COL16A1	COPS8	DACT1	FYN	GNB4	GRB10	GRIK2	HS3ST4	IGF2R	INPP4B	INPP5F	ITPKB	KCNA2	KCNAB2	KCNC1	LAMP2	LEF1	LPIN1	LUM	MYH10	PIK3CD	PIKFYVE	PLCG1	PREX1	PRKACB	PTPN1	RAB3GAP2	RAB3IL1	RAB7A	ROR1	RPS6KA2	SEPT7	SFRP1	SHC4	SMPD1	TGFBR1	THBS2
UNC0638.1	na	ARHGDIA	ARHGEF2	CAMK4	CTNNA2	DUSP4	EPHA3	FYN	GRB10	IGF2R	ITPR1	LEF1	MEF2A	MEF2C	RAB7A	WIPI1
UNC0638.1	na	ARHGDIA	ARHGEF2	CAMK4	CTNNA2	DUSP4	EPHA3	FYN	GRB10	IGF2R	ITPR1	LEF1	MEF2A	MEF2C	RAB7A	WIPI1
UNC0638.1_md2	module_2	AMPH	ATP6V0B	ATP6V1B2	ATP6V1H	COPS8	KCNN2	MAD1L1	MCOLN1	NDUFAF1	RAD51C	RRAGD	SEC61A1	SLC35B2
UNC1215	na	AKR1B10	ALDH3A1	ATP6V0E1	CAPN2	CAPN5	CLDN2	CP	CXCL5	CYP3A5	FGB	GALNS	HSPG2	IRS1	ITGB6	JAG1	LAMP1	MC4R	PF4	PFKFB3	PLA2G16	PLA2G1B	PPBP	RELN	SMAD6
VX-11e	na	A2M	ABR	AK2	ALAS1	ARHGAP12	ARHGAP26	ARHGAP32	ARHGEF11	ARHGEF2	ATP1A1	AXIN2	BLK	CEACAM1	CEACAM8	CSK	CTNNB1	DYRK2	EIF1B	EIF3A	EIF3D	EIF3M	EIF4B	ENTPD6	ESRRA	ESRRG	FASLG	FCGR2A	GMIP	GTF2B	IL12RB2	IL20RA	IL6R	IRS2	LCP2	LEF1	MCF2L	MEF2A	MEF2D	MYC	NFATC2	NOP14	NR4A2	PAN3	PDCD11	PHLPP1	PLK3	POLR1B	POLR1D
Vinblastine	na	ACTN1	ANGPT1	ASB1	B4GALNT1	B4GALT2	CAV1	CCNC	CD44	CDK9	COL12A1	COL16A1	COL1A1	COL1A2	COL27A1	COL3A1	COL4A1	COL4A5	COL4A6	COL5A1	COL5A2	COL6A1	COL6A2	COL6A3	COL7A1	COPS2	COPS3	DIMT1	DPH3	DPH5	DPH6	EIF2S1	EIF2S2	EIF3I	ELL2	EPHA5	ETF1	FABP4	FBXL4	FBXO27	FER	GRHPR	GSTP1	IL11	ITGA4	ITGA5	KPNA4	LAMC1	LUM
Vinblastine	na	ACTN1	ANGPT1	ASB1	B4GALNT1	B4GALT2	CAV1	CCNC	CD44	CDK9	COL12A1	COL16A1	COL1A1	COL1A2	COL27A1	COL3A1	COL4A1	COL4A5	COL4A6	COL5A1	COL5A2	COL6A1	COL6A2	COL6A3	COL7A1	COPS2	COPS3	DIMT1	DPH3	DPH5	DPH6	EIF2S1	EIF2S2	EIF3I	ELL2	EPHA5	ETF1	FABP4	FBXL4	FBXO27	FER	GRHPR	GSTP1	IL11	ITGA4	ITGA5	KPNA4	LAMC1	LUM
Vinblastine_md2	module_2	ADORA2B	ALDH1L2	ARL3	CASP1	CEP63	CGAS	CLTA	CPOX	CSNK1E	CTSL	CYB5R4	DPYD	DUSP7	DYNC2H1	GNB4	ITPR1	KLC1	MAPK12	MYH10	NEDD1	NLRP1	NUDC	ORC3	OSBPL1A	OTUB1	PAFAH1B1	PDCD1LG2	PDCL	PFN2	PIGB	PLXNA1	PPP3CB	PSMB7	PTPN2	RARS2	RGS19	ROBO1	SLC25A32	TRAF3	TRIM32	TUBB6
Vinorelbine	na	ABT1	AGO3	ASF1A	ATR	BMS1	BYSL	C1QBP	CCNC	CCT5	CCT6A	CDK9	CLP1	COPS2	COPS3	CPSF2	DCUN1D1	DDX31	DNAJA1	ETF1	EXOSC2	EXOSC9	FANCE	FAU	FBXL4	GLMN	HBS1L	HDAC1	HDAC8	HSPA4L	HSPA9	IARS	KDM4A	KPNA4	LTV1	MAGOH	MRPL3	MRPL47	NAE1	NCL	NOC3L	NOP56	NOP58	NUP155	NUP188	NUP54	PAK1IP1	PDCD11	PHF5A
Vorinostat	na	ACVR1B	AHCY	ASXL2	BMP7	CACNA2D2	CHD4	CNTFR	CRKL	DCXR	DDX4	DLL1	DNMT3B	FANCC	FOXO1	GTF3C4	GTF3C5	HDAC2	IGF2BP1	IL3	KDM2B	MTF2	MYL10	NACA	NSL1	PA2G4	PARP1	PDCD11	PIWIL2	POLE	POLR1D	POLR3K	POU2F1	PPP1CC	PRIM1	PRKG2	PUM2	REL	RNPS1	RPL13	RPL13A	RPL18	RPL22	RPL23	RPL27	RPL30	RPL35	RPL38	RPL5
WZ3105	na	AGO2	AGO4	AHCTF1	ANK3	ARHGAP32	ARHGAP39	ARHGEF16	ARHGEF4	ASS1	CCAR1	CCT3	CHTOP	CRNKL1	CTBP2	DDX49	DDX5	DGCR8	EFNA3	EPHA1	EPHB4	EPHB6	EPRS	FAU	FOXA1	GATAD2B	GGPS1	GHR	GLUL	GMIP	HEY2	HNRNPM	IGFBP2	IMP3	ISG20L2	JAG2	KLK3	LMO2	LRIG1	MAML1	MAP2K7	MAPK13	MCF2L	MED17	MEN1	MMTAG2	MRPL13	MRPL15	MRPL4
XAV939	na	ACTN4	ADAM10	ANXA1	ANXA2	BIRC2	BIRC3	C3	CAPN1	CAPN2	CASP4	CAST	CAV1	CCL2	CD2AP	CDC42EP3	CFLAR	CLDN1	COL4A3	COL4A4	COL4A5	COL4A6	CTGF	CTNND1	CXCL1	CXCL2	CXCL5	CXCL6	DDX58	DSG2	EDN1	EDN2	EFNA5	EGFR	EIF2AK2	EPHA2	EZR	FAS	FLNB	GAS6	HSPG2	IFITM2	IL18	IRAK2	IRF1	ITGA2	ITGA3	ITGAV	ITGB1
XL-184	na	CACNA1A	COL11A1	DGKB	DLK1	F2R	FAS	HGF	ITGA11	MED16	MET	MTMR10	NPFF	PDGFRA	PDGFRB	PRKCA	PRKG1	RASA1	RXFP2	SFRP2	SMURF1	SOX9	SYNJ2	TIAM2	WLS
XL-880	na	AEBP2	BACE1	BIRC2	CACNA1A	CAV1	CBX3	CDC27	CDK6	CHN1	COL11A1	COL3A1	CRMP1	DCN	DNM1	DPYSL3	F2R	FAS	FGFR1	FOXG1	FZD7	GNRH1	GSPT2	GTF2F2	HDAC9	HGF	HNRNPA2B1	HNRNPD	HNRNPDL	HSPA5	IGFBP3	ITGA11	ITGAV	KHDRBS1	KIF7	LRRFIP1	MEF2A	MMP2	NPFF	PDGFA	PDGFRA	PDGFRB	PKD1	RAC1	RASA1	RGS2	SEMA3A	SFRP2	SKI
XMD13-2	na	AK1	ARID1A	ARID1B	CDK9	CPSF7	DDX5	EGR2	HLA-C	MAML1	MED17	NUP188	NXF1	POLE3	PPIP5K1	RCC2	SMAD1	TBL1XR1	WDR5	YEATS2
XMD13-2	na	AK1	ARID1A	ARID1B	CDK9	CPSF7	DDX5	EGR2	HLA-C	MAML1	MED17	NUP188	NXF1	POLE3	PPIP5K1	RCC2	SMAD1	TBL1XR1	WDR5	YEATS2
XMD13-2_md2	module_2	ARHGAP32	AWAT2	CDC37L1	CSNK1G2	DCAF10	DGKZ	EPHB2	FBXO10	GBA2	GPC2	KDM4A	MUCL1	PKP1	RIPK1	SHPRH	SOX4	STX17	SYK	TRPV6	UBE2R2	USP20	VANGL2	WNK2
XMD15-27	na	COL6A1	COL6A6	DACT1	F13A1	F2R	F2RL2	HAS1	PDGFRA	PLXNA4	RGS18	ROR1	SFRP2	THBS3	TWIST2
Y-39983	na	BDNF	CEP78	DNM1	EPHB1	FGF21	GFRA1	ITGAV	LFNG	PDGFC	PDGFRB	RASA1	RHOA	STAG1	SUMO1	TCF12	TCP1	TGFB2	TLE4	VCL	YWHAQ
YK4-279	na	AK2	CARM1	CASP1	CDK9	COPS2	COPS3	DARS	DIMT1	DNAJC8	EEF1A1	EEF2	EIF3G	EIF3I	EIF3M	EXOC2	FBXL4	FBXW11	GEMIN4	GRHPR	GTF2F2	HDAC3	HSPA5	IMPDH2	ITGB3BP	MED27	MRPL47	MYH10	NUDC	NUP188	OTUB1	PFAS	PHGDH	PLXNA1	PPP1R12A	PSMB7	RACK1	RARS2	RELA	RNF7	RPA1	RPL11	RPL13A	RPL37	RPL5	RPS12	RPS4X	SERBP1	SF3A3
YM155	na	ACTR10	AMOTL1	ARCN1	ARL6	CBL	CEP164	FBXW11	JARID2	KDM5B	PIAS3	PPP3CB	SMURF2	STK3	TAF1A	TNKS2	UBE2E2
YM201636	na	ATP5F1A	ATP5F1C	ATP5MC3	ATP5ME	COX5B	COX6C	CYC1	DLD	ETFDH	FH	LDHD	NDUFA4	NDUFAB1	NDUFAF1	NDUFB10	NDUFB3	NDUFB9	NDUFS1	NDUFV3	OGDHL	UQCR11	UQCRB	UQCRC2	UQCRQ
YM201636	na	ATP5F1A	ATP5F1C	ATP5MC3	ATP5ME	COX5B	COX6C	CYC1	DLD	ETFDH	FH	LDHD	NDUFA4	NDUFAB1	NDUFAF1	NDUFB10	NDUFB3	NDUFB9	NDUFS1	NDUFV3	OGDHL	UQCR11	UQCRB	UQCRC2	UQCRQ
YM201636_md2	module_2	ACACB	ACOT13	DNAJC19	FECH	GNMT	MCCC2	MED1	MMAA	MRPL13	MRPL15	MRPL19	MRPL24	MTR	NOS2	PCCB	PIKFYVE	PLEK	PPARGC1A	SOD1	SSR1	SUMO1	TIMM13	TIMM17A	TIMM21	TOMM20	TUFM
ZM-447439	na	AGO3	BMS1	CDC37L1	CDK9	DDX21	DMP1	GEMIN4	HSP90AB1	KAT2A	MFAP1	NOB1	NUP160	POLR3D	PPID	RIOK1	RPL37A	RPS18	SNAPC4	TAF12	TGFB1	TGS1	UPF3B	UTP6
ZSTK474	na	AR	ARID4B	CCAR1	ERBB2	ERCC8	GNMT	GRB7	GUCY1A1	IL12B	KLK2	KLK3	MAP3K1	ORMDL3	SMARCE1
Zibotentan_ZD4054	na	ARHGEF17	BCL6	CP	FN1	FOXG1	GCNT1	ITGB2	LAMB2	MFGE8	MYL2	PLXDC1	SDC2	TNS3
_5Z_-7-Oxozeaenol	na	A2M	ABL2	ABR	APOE	ARAP3	ARF4	ARFGAP1	ARFGAP3	ARHGAP22	ARHGAP24	ARHGDIA	ARHGEF11	ARHGEF2	ARPC1B	ARSB	ATG7	B4GALT6	BCAN	BET1L	CABLES1	CAV1	CERK	CHPF	CHSY3	CLCN7	CLTA	COPA	CTSK	DEPDC7	DLC1	DOCK1	DPH3	DPH5	DUSP3	ELP2	ELP6	EPS15	EXOC2	EXOC4	EYA4	FARP2	FCER1G	FER	FGD1	FKBP1A	GGA1	GLB1	GM2A
_5Z_-7-Oxozeaenol	na	A2M	ABL2	ABR	APOE	ARAP3	ARF4	ARFGAP1	ARFGAP3	ARHGAP22	ARHGAP24	ARHGDIA	ARHGEF11	ARHGEF2	ARPC1B	ARSB	ATG7	B4GALT6	BCAN	BET1L	CABLES1	CAV1	CERK	CHPF	CHSY3	CLCN7	CLTA	COPA	CTSK	DEPDC7	DLC1	DOCK1	DPH3	DPH5	DUSP3	ELP2	ELP6	EPS15	EXOC2	EXOC4	EYA4	FARP2	FCER1G	FER	FGD1	FKBP1A	GGA1	GLB1	GM2A
_5Z_-7-Oxozeaenol_md2	module_2	ACSBG1	ACSL3	AGPAT1	AKT3	ALDH1A3	ALDH1B1	AMDHD2	APH1B	ATP1A1	ATP6V0A4	ATP6V0D2	ATP6V1C1	ATP6V1E1	ATP6V1F	ATP6V1H	B3GNTL1	B4GAT1	BAX	CAMK4	CARM1	CCNH	CD81	CD96	CDC16	CDC37	CDK17	CDK2	CDK5	CDS2	COL13A1	COL15A1	COL16A1	COL9A3	CREB3L2	CSF3	CTNNB1	CUL7	CYP2U1	DACT1	DDB2	DDOST	DGKI	DOCK4	DVL2	EEF2	EIF3D	EIF3G	EIF3I
piperlongumine	na	ABL1	AKT3	AMOTL1	ANXA6	AP3S1	APH1B	APP	ARFGAP3	ARHGAP10	ARHGAP29	ARHGEF17	ARHGEF6	ARSB	ATP2B4	B4GALT2	B4GAT1	BDNF	BTRC	CAMK4	CAV1	CCNH	CDC27	CHN1	COL11A1	COL12A1	COL13A1	COL15A1	COL3A1	COL8A1	CTSL	CUL7	DEGS1	DOCK1	DPH3	DPYD	ERBIN	ERCC1	EXOC2	FBXL5	FBXW11	FGD1	FKBP1A	FYN	GADD45GIP1	GALNT15	GNB4	GNG5	GOPC
rTRAIL	na	ABCC3	AHR	AKR1B10	ALDH3A1	CASP8	CCAR2	COA6	CPS1	DGKD	DLD	ECHS1	G6PD	GPAT3	HSPA12B	IDH1	KYNU	MDH2	NAMPT	PGD	PLA2G4A	PMPCB	PPARG	SQSTM1	TDO2	TNFRSF10A	TNFRSF1B
rTRAIL	na	ABCC3	AHR	AKR1B10	ALDH3A1	CASP8	CCAR2	COA6	CPS1	DGKD	DLD	ECHS1	G6PD	GPAT3	HSPA12B	IDH1	KYNU	MDH2	NAMPT	PGD	PLA2G4A	PMPCB	PPARG	SQSTM1	TDO2	TNFRSF10A	TNFRSF1B
rTRAIL_md2	module_2	AP1S1	ARHGAP26	BUD23	BUD31	CCL11	CUL1	CWC22	CXCL2	DCTN6	EIF3B	HEATR1	HECW1	ITGA8	KIF9	NMB	NSUN2	PDE4D	PRKAR1B	PROK1	RAC1	STAMBPL1	TAS2R5	UTS2
[truncated: 203 more columns]

## Sheet: NCM
17-AAG	na	ATP6V1C2	CACNA2D2	CACNB4	CAMK2B	CCL19	CHGA	CHGB	CPLX1	DCTN2	DLG2	DNAJC6	DPP4	GAB2	GRIP1	GRP	HCN4	INSR	IRS2	KCNH2	KRAS	LSM4	MED25	NAPB	NRXN1	PCSK2	PIK3AP1	PPP1CC	PPP1R1A	RAB6B	RANBP2	RORA	SCG3	SCN3B	SNAP91	TP53BP2	TUBB2B	USP2
5-Fluorouracil	na	ADAMTS1	ADCY9	ARPC1B	ARSB	ATP6AP2	B4GAT1	BLVRA	BMP1	CALD1	CALU	CAP2	CAV1	CBR3	CCL2	CD59	CD63	CD99	CDH2	CEP250	CHPF2	CHST14	CHSY3	COL12A1	COL4A1	COL5A2	CTGF	CYB5R3	CYR61	DLC1	DUSP3	DYNC1LI2	DYNLRB1	EFEMP2	EHD2	ENPP2	EPAS1	EXOC7	EXT2	FLNA	FN1	GALNS	GFRA1	GGCX	GNA12	GNAI1	GNG11	GNG12	GPNMB
ABT-263	na	AARS	ARNT	ATIC	BAG3	CSNK2A2	CTNNB1	CTSL	EEF1D	EIF3I	ETF1	GALE	GAR1	GEMIN6	GRPEL1	HADHB	IMPDH2	IRF2	KARS	MAT2B	MCL1	MRPL16	MRPL41	MT2A	MTHFD1L	MYH9	MYO1C	NFKB1	NIP7	NOB1	NOC3L	OTUB1	PDCD6IP	PFN1	PGM1	PPP3CB	PSMB4	PYGL	QARS	RACK1	RPL11	RPL13	RPLP1	SCO1	SUCLG2	TKT	TNFRSF1A	TRADD	UBE2D3
ABT-869	na	CCNT1	DSG2	GTF2B	LYN	NUP107	NUP37	PIK3CB	STK26	STK4	TSG101
AC220	na	ADRB2	ARAP1	ARAP3	CDK7	CXCL8	GADD45A	GNA15	GTF2B	IL15RA	IL1A	IL1B	IL4R	ITGA2	ITGA3	LAMB3	LAMC2	MT2A	PLAT	PLAU	PXN	SLC2A1
AG-014699	na	AGPAT2	CYP2J2	ELL	EXOSC5	GEMIN7	GK	GNAO1	GRK2	GRPEL1	GUCY2D	ISG20L2	LCLAT1	LSM3	MAPK13	MBOAT1	MRPS12	MRPS7	NSUN2	POLR2K	SELENOI	SRSF2	SUPT4H1	TIMM10	TOMM40	TRMT10C	TRMT6	ZNF473
AICAR	na	A2M	ABL1	ALAS1	AMPD2	AP1M1	AP1S2	ARSB	ARSE	ATM	ATP5PF	ATP6AP2	ATP6V1B2	B4GALT6	B4GALT7	BET1	CABLES1	CAP2	CAPZA2	CCNE1	CD320	CD63	CDH2	CDK2	CDK5	CHPF2	CHST2	CLTC	COL11A1	COL1A2	COPG1	CTNNB1	DAD1	DDR2	DOCK11	DPYSL2	DPYSL4	FGFR1	FYN	G6PC3	GAB2	GANAB	GLB1	GNG11	GNG5	GPC6	GRB10	GSK3A	GYG2
AKTinhibitorVIII	na	ABL2	AKT3	AP1S2	CCNG1	CDK5R1	DVL2	EPS15	FYN	GAB2	GNAS	GNG4	GPAT4	IRS2	KAT2B	LEF1	LPIN1	MAD1L1	PHLPP1	PIK3CD	PPP1CC	RHOJ	SPRY2	UBE2E1
AR-42	na	ACSS2	ALDH3A1	CAPN1	CAPN2	CAST	CAV1	DGKA	EGFR	EPAS1	HFE	HLA-G	IL13RA1	ITGB1	LAMP1	MAN2A1	MON1B	NCOA3	NR3C1	P4HA2	SAR1B	SDHA	SERPINH1	SGPP1	SHMT1	VAMP3
AS605240	na	ABL1	ADAM12	ADAM17	ADAMTS2	ASF1A	ATF2	CCT5	CDC5L	CENPE	CNEP1R1	COL1A2	COL5A1	COL6A2	COPS3	COPS4	CWC22	DNAJC8	EFEMP2	ELL2	FBN1	FGFR1OP	FLNC	FZD2	GCLM	GJA1	HMOX1	ING2	ITGA5	LOX	LOXL1	MBD2	MYH9	MYL6	MYL9	NDEL1	NEDD1	NEDD4	NFYB	NRBP1	PFN2	PLK4	PPP2CB	PPP3CC	PRC1	SAP30	SMAD4	SORBS3	SPDL1
AS605240	na	ABL1	ADAM12	ADAM17	ADAMTS2	ASF1A	ATF2	CCT5	CDC5L	CENPE	CNEP1R1	COL1A2	COL5A1	COL6A2	COPS3	COPS4	CWC22	DNAJC8	EFEMP2	ELL2	FBN1	FGFR1OP	FLNC	FZD2	GCLM	GJA1	HMOX1	ING2	ITGA5	LOX	LOXL1	MBD2	MYH9	MYL6	MYL9	NDEL1	NEDD1	NEDD4	NFYB	NRBP1	PFN2	PLK4	PPP2CB	PPP3CC	PRC1	SAP30	SMAD4	SORBS3	SPDL1
AS605240_md2	module_2	ACO1	ANXA7	ARHGAP10	ATG5	BNIP3L	CDKN2C	CITED2	CNOT7	ENO1	FBXO5	GLIPR1	GOPC	KTN1	PDCD1LG2	PGM3	PPIL4	PRKRA	PSMB6	PSMD5	RAB10	SCFD1	SEC23A	STEAP3	TMEM11	TRIO	VPS35	VPS37A	VTA1
AT-7519	na	ABCB1	ABCC2	ABCC4	ABL2	AGPAT3	AMDHD2	ARSB	ARSE	B4GALNT1	C1S	CAP2	CBR3	CD63	CD99	CDH2	CDK4	CDK5	CERS2	CHPF2	CHPT1	CHST13	CHSY3	CLCN7	CTGF	DCTN2	DGAT2L6	DPYSL2	DUSP3	DYNLRB1	EFEMP2	ELOVL2	ENPP2	FLNA	G6PC3	GBE1	GFRA1	GLB1	GLRX	GNPDA1	GPAT3	GSTM4	GSTO1	HABP4	HACD1	HMOX1	ILK	KIF3C	LRP1
AT-7519	na	ABCB1	ABCC2	ABCC4	ABL2	AGPAT3	AMDHD2	ARSB	ARSE	B4GALNT1	C1S	CAP2	CBR3	CD63	CD99	CDH2	CDK4	CDK5	CERS2	CHPF2	CHPT1	CHST13	CHSY3	CLCN7	CTGF	DCTN2	DGAT2L6	DPYSL2	DUSP3	DYNLRB1	EFEMP2	ELOVL2	ENPP2	FLNA	G6PC3	GBE1	GFRA1	GLB1	GLRX	GNPDA1	GPAT3	GSTM4	GSTO1	HABP4	HACD1	HMOX1	ILK	KIF3C	LRP1
AT-7519_md2	module_2	ABCC6	AK5	ANXA5	ANXA6	AP1M1	AP1S2	ARL1	ASB9	ATP6V0A1	ATP6V1F	CALU	COPS8	COPZ1	CYB5R3	DDR2	EPN1	FAH	GLS	GNG11	HIBADH	KDELR1	NDUFAF3	NDUFB2	NME4	NNMT	NNT	NR1H2	NRCAM	PAPSS2	PIP4K2A	POLR2L	PPP3CC	PTPN23	RAB11FIP3	RAB32	RAD51D	SERPINE2	SPTBN1	SUCLG2	TAF6	TIMP2	VIM	VPS4A	VPS53
AUY922	na	AKR1B10	ALOX15	AQP11	ATP5MC3	ATP6V0E2	ATP6V1C2	CFTR	CKMT2	COX20	COX5B	COX6B1	COX6C	CYB5A	CYP3A5	DLD	DNAJC19	DPP7	EPHX2	FBP1	GPD2	GPX6	GSTA1	GSTA2	HMGCS2	HPGD	IDH1	IDH2	MAOB	MDH2	NAT2	NDUFA4	NDUFB2	NSF	PMPCB	RAB4A	SDHC	SLC25A13	TFRC	UQCR10	VDAC3
AZD6244	na	ABRAXAS2	AGO3	AHCTF1	ALMS1	AMD1	ANAPC10	ANAPC7	ARHGAP10	ARHGAP11A	ARHGAP35	ARHGAP44	ARID2	ARID4B	ARL3	ASF1A	ATAD5	BARD1	BAZ1B	BIRC5	BMS1	BRD8	BUB1	CACNA2D2	CASP6	CBX5	CCNA2	CCNE2	CCNF	CCP110	CDC23	CDC25C	CDC5L	CDC7	CDCA5	CDCA8	CDKN2C	CDT1	CENPA	CENPC	CENPE	CENPF	CENPJ	CENPL	CENPQ	CENPU	CEP192	CEP70	CEP76
AZD6244	na	ABRAXAS2	AGO3	AHCTF1	ALMS1	AMD1	ANAPC10	ANAPC7	ARHGAP10	ARHGAP11A	ARHGAP35	ARHGAP44	ARID2	ARID4B	ARL3	ASF1A	ATAD5	BARD1	BAZ1B	BIRC5	BMS1	BRD8	BUB1	CACNA2D2	CASP6	CBX5	CCNA2	CCNE2	CCNF	CCP110	CDC23	CDC25C	CDC5L	CDC7	CDCA5	CDCA8	CDKN2C	CDT1	CENPA	CENPC	CENPE	CENPF	CENPJ	CENPL	CENPQ	CENPU	CEP192	CEP70	CEP76
AZD6244_md2	module_2	ABCF1	ALKBH5	AR	ATF2	CAMK2B	CAMK2G	CBS	CCAR1	CCNB1	CCNC	CCT5	CDC20	CDK1	CDK19	CDKN1B	CKAP5	DDX23	DNAJC2	EIF4A3	ELAVL1	ENAH	EPRS	EVL	EXOSC9	FBL	FERMT2	FLNB	FOXM1	FZD2	GLI1	GUCY1A1	GUCY1B1	H2AFV	HBS1L	HNRNPH1	HNRNPR	HSPA14	JAM2	LIN7B	MAD2L1	MAGOH	MAGOHB	MAP3K7	MAPK8	MAPK9	MED20	MED23	MED30
AZD6244.1	na	ALMS1	ARHGAP11A	ARL3	ASF1A	ATAD5	BARD1	BAZ1B	BIRC5	CBX5	CCAR1	CCNA2	CCNC	CCNE2	CDC20	CDC25C	CDC40	CDC5L	CDC7	CDCA8	CENPA	CENPC	CENPE	CENPF	CENPP	CEP192	CEP70	CEP76	CEP78	CKAP5	CPSF7	CSTF3	DBF4	DLGAP5	DNA2	DNAJC6	DNMT1	DROSHA	E2F2	ECT2	EXO1	EZH2	FANCC	FANCM	FBXO5	FGFR1OP	GEMIN2	GMNN	H2AFV
AZD6244.1	na	ALMS1	ARHGAP11A	ARL3	ASF1A	ATAD5	BARD1	BAZ1B	BIRC5	CBX5	CCAR1	CCNA2	CCNC	CCNE2	CDC20	CDC25C	CDC40	CDC5L	CDC7	CDCA8	CENPA	CENPC	CENPE	CENPF	CENPP	CEP192	CEP70	CEP76	CEP78	CKAP5	CPSF7	CSTF3	DBF4	DLGAP5	DNA2	DNAJC6	DNMT1	DROSHA	E2F2	ECT2	EXO1	EZH2	FANCC	FANCM	FBXO5	FGFR1OP	GEMIN2	GMNN	H2AFV
AZD6244.1_md2	module_2	ARRB2	CCT5	CDK1	CKB	COPS3	COPS4	CUL2	DCUN1D2	DOLPP1	EIF2S1	EIF4A3	EIF5B	EXOSC9	GLMN	HDAC2	HSPA14	ITGAE	KIF5B	LIFR	LRR1	LTV1	MAPK9	MRPL14	MRPS15	MRPS9	NFATC3	NOTCH3	NSD2	PARP2	PIAS4	PPP5C	RAB18	TAF11	TAF2	TAF5	TLE2	UBE2G1	UCHL1	UPF3B	USP1	VCP	VTA1
AZD6482	na	AEBP2	ANP32A	ATXN7L3	AXIN2	BAZ2A	BLM	BTBD1	CCNT1	CDC25A	CDK8	CENPP	CHD8	CNOT10	CPSF7	CWC22	DDX5	DHX15	DHX36	E2F6	EED	EHMT1	EIF4A3	ERCC3	FANCI	FANCL	GTF2A1	GTF2B	HIST3H2A	HNRNPH1	IMP3	KANSL1	KAT2A	KAT8	KRAS	LIN52	MIS18BP1	MRPS5	MSL2	MTA1	NCAPD3	NCL	NCOR1	NOL11	NOP14	NSUN6	NUP160	OGT	PABPN1
AZD6482	na	AEBP2	ANP32A	ATXN7L3	AXIN2	BAZ2A	BLM	BTBD1	CCNT1	CDC25A	CDK8	CENPP	CHD8	CNOT10	CPSF7	CWC22	DDX5	DHX15	DHX36	E2F6	EED	EHMT1	EIF4A3	ERCC3	FANCI	FANCL	GTF2A1	GTF2B	HIST3H2A	HNRNPH1	IMP3	KANSL1	KAT2A	KAT8	KRAS	LIN52	MIS18BP1	MRPS5	MSL2	MTA1	NCAPD3	NCL	NCOR1	NOL11	NOP14	NSUN6	NUP160	OGT	PABPN1
AZD6482_md2	module_2	ACVR2A	ARHGEF7	ARRB2	ATP5F1B	ATP6V1C2	B3GNT5	BMP7	COL17A1	COX5A	CRMP1	CSK	ESRRA	ETFA	FBXW7	GBA2	GOT1	GRPEL2	HSPD1	IDH3A	IGF1R	IGFBP2	ISL1	ITGA6	KDM2B	LCK	LEMD3	MAP2K6	MDH1	MP68	NDUFAB1	NELL2	NR1D2	NR2C2	PAK1	PGAP1	PLPP2	PLXNA2	POU4F1	PTCD3	RCOR1	SH3PXD2A	SLC25A5	SP1	TIMM44	TMED10	TSEN15	UQCRH	VHL
AZD6482.1	na	ALAS1	ANP32A	APEX1	ARID4A	ATIC	ATP5F1B	ATP6V1C2	C1QBP	CAD	CCAR1	CCT2	CCT3	CHD1	CHD4	CLNS1A	CMAS	CNOT10	CNOT2	COX5A	COX5B	CPSF3	CSTF1	DDX21	DDX54	DDX55	DKC1	EFL1	EIF3A	EIF3E	EIF3H	EIF4B	ESRRA	GMPR2	GTF3C2	GTF3C3	GTF3C5	HIST3H2A	HMGB1	HNRNPA3	HNRNPK	HSPD1	IMP3	IMPDH2	INSR	KRR1	LRPPRC	LYAR	MAT2A
AZD6482.1	na	ALAS1	ANP32A	APEX1	ARID4A	ATIC	ATP5F1B	ATP6V1C2	C1QBP	CAD	CCAR1	CCT2	CCT3	CHD1	CHD4	CLNS1A	CMAS	CNOT10	CNOT2	COX5A	COX5B	CPSF3	CSTF1	DDX21	DDX54	DDX55	DKC1	EFL1	EIF3A	EIF3E	EIF3H	EIF4B	ESRRA	GMPR2	GTF3C2	GTF3C3	GTF3C5	HIST3H2A	HMGB1	HNRNPA3	HNRNPK	HSPD1	IMP3	IMPDH2	INSR	KRR1	LRPPRC	LYAR	MAT2A
AZD6482.1_md2	module_2	AEBP2	CDC25A	CDH1	CDK8	CEP57	CEP72	E2F6	ELF1	FANCL	GTF2B	KLF4	LIN9	MCM2	MED28	NCOR1	PRIM1	RFC5	SFN	SNW1	SP1	SUZ12	TEX10	TFDP1	TUBGCP3
AZD7762	na	APLP2	ARAF	CDH1	CTR9	CUL5	EXOC7	GATA2	GATA3	HDAC11	HIST1H2BK	HIST1H2BN	HIST1H4A	HIST1H4B	HIST1H4C	HIST1H4D	HIST1H4E	HIST1H4F	HIST1H4H	HIST1H4I	HIST1H4J	HIST1H4K	HIST1H4L	HIST2H4A	HIST2H4B	HIST4H4	KAT5	KAT7	MSX2	MYB	NELFE	NFYA	PEX1	PEX11A	PGR	RET	SPOP	SYDE2	SYVN1	TAF10	TRIM24	UBE4A	ZNF41
Afatinib	na	ACTA2	ADAMTS2	ANXA5	ARF4	ARHGEF6	B4GAT1	CALD1	CAPZB	COL13A1	COL1A1	COL1A2	COL3A1	COL5A2	COL6A1	COL6A2	COL6A3	COL8A1	DDR2	DPYSL2	DPYSL3	DPYSL4	EFEMP2	FBN1	FGFR1	FLNC	GIT2	HABP4	ITGA4	ITGA5	ITGA7	KIF3C	KIF5A	LAMA1	LOX	LOXL1	LUM	MYO9B	NID1	NRP1	ORAI2	P3H1	PAK3	PARVA	PCOLCE	PCOLCE2	PDGFRB	PKD1	PKD2
Afatinib	na	ACTA2	ADAMTS2	ANXA5	ARF4	ARHGEF6	B4GAT1	CALD1	CAPZB	COL13A1	COL1A1	COL1A2	COL3A1	COL5A2	COL6A1	COL6A2	COL6A3	COL8A1	DDR2	DPYSL2	DPYSL3	DPYSL4	EFEMP2	FBN1	FGFR1	FLNC	GIT2	HABP4	ITGA4	ITGA5	ITGA7	KIF3C	KIF5A	LAMA1	LOX	LOXL1	LUM	MYO9B	NID1	NRP1	ORAI2	P3H1	PAK3	PARVA	PCOLCE	PCOLCE2	PDGFRB	PKD1	PKD2
Afatinib_md2	module_2	ABI2	ABL1	ABL2	ACAT1	ACLY	ACSL4	ACTR1A	AGPAT1	AGPAT5	AK5	AKT3	ANGPT1	ANPEP	APH1B	APPL1	ARSB	ARSK	ATF2	ATP6V1B2	BAX	BDNF	BLMH	BNIP1	BRK1	CADM1	CAP2	CCL2	CCT8	CD99	CDC34	CDC42	CDH11	CDH2	CDK5	CDON	CEP164	CHPT1	CLASP2	COPS7B	COPS8	CREB3L2	CSNK1E	CSTF3	CTPS1	CUL4B	CYP2U1	DCN	DCP1B
Afatinib_rescreen_	na	A2M	ACAT1	ACTR1A	ADAMTS2	AKT3	ANAPC5	ANGPT1	APH1B	ARF4	ARHGAP17	ARHGEF2	ARHGEF6	ATM	ATP5F1A	ATP5F1B	ATP5PF	ATP6V1B2	BABAM1	BLMH	CAPZB	CCT8	CDC34	CDCA8	CDK2	CDK5R1	CEP164	CHN1	CLSPN	COL13A1	COL1A1	COL1A2	COL3A1	COL5A2	COL6A1	COL6A2	COL6A3	CPN1	CSNK1E	DCN	DCUN1D4	DDX39A	DLC1	DNER	DPYSL2	DPYSL3	DPYSL4	DYNC1H1	DYNC1LI1
Afatinib_rescreen_	na	A2M	ACAT1	ACTR1A	ADAMTS2	AKT3	ANAPC5	ANGPT1	APH1B	ARF4	ARHGAP17	ARHGEF2	ARHGEF6	ATM	ATP5F1A	ATP5F1B	ATP5PF	ATP6V1B2	BABAM1	BLMH	CAPZB	CCT8	CDC34	CDCA8	CDK2	CDK5R1	CEP164	CHN1	CLSPN	COL13A1	COL1A1	COL1A2	COL3A1	COL5A2	COL6A1	COL6A2	COL6A3	CPN1	CSNK1E	DCN	DCUN1D4	DDX39A	DLC1	DNER	DPYSL2	DPYSL3	DPYSL4	DYNC1H1	DYNC1LI1
Afatinib_rescreen__md2	module_2	ABI2	ABL1	ABL2	ACTR8	AES	AGPAT1	AGPAT5	AK2	AMH	ANPEP	APPL1	ARHGEF25	ASNA1	ATF2	BAMBI	BDNF	BRD8	BRK1	BRPF1	BTBD1	C3AR1	CADM1	CAMK4	CAP2	CCL2	CCNH	CCR10	CDC25C	CDC42	CDH11	CDH2	CDK4	CDK5	CDON	CHPT1	COPS6	COPS7B	COPS8	CSTF3	CTPS1	CTSK	CUL4B	CYP2U1	DACT1	DCAF16	DCP1B	DDX41	DDX49
Axitinib	na	BCL2L1	BTC	CD47	CD59	CDH1	CHMP2B	CTSS	EREG	INSIG2	IRS2	ITGA2	LCN2	MAP3K1	MET	PTPN6	PTPRK	RUNX1	SLC2A1	TGFA	TNFRSF21	UBE2E1	VPS37B	YOD1
BAY61-3606	na	ADI1	ARF5	ATP6AP2	CD9	CYB5R1	GPD2	HSPA1A	HSPA2	LDLRAP1	MED25	NAGK	PGRMC1	PNPLA8	ST6GALNAC2	TAX1BP1	TFAP2C
BMN-673	na	ACOX1	ACSL1	ACSL5	ADCY6	AGPAT2	AKT1	ALG3	ARF6	ARFGAP2	ARHGAP45	ARRB1	ASAH1	ATP13A2	ATP6V0A1	ATP6V0B	ATP6V0D1	BCAP31	BCL2L11	BMP4	BMP7	CDH1	CPT1A	CYP2S1	DGKQ	EFNB2	ELOVL1	ENTPD6	ENTPD8	ERBB2	ESRRA	FABP1	FGFR4	FOXO4	GBA	GMDS	GMIP	GNRH2	GSTA3	HEPH	HNF4A	IRF5	IRF8	ITPKC	JAG2	KALRN	KIF13B	KLF4	LFNG
BMS-345541	na	ARL1	CALU	CAP2	CD151	CD63	CDH2	COL6A2	CTGF	DBNL	EHD2	EPN1	GNA12	ICAM1	IL12A	IL6ST	IL7R	ITGB5	LMNA	LY96	MT1E	MT2A	MYH9	MYO1C	NECTIN3	NOTCH2	NR1H2	PTPN1	PTX3	RRAS	SEC13	SPARC	TIMP2	TNFAIP6	YKT6
BMS-536924	na	AKT1	AMPH	ARF4	BNIP1	CDH2	CDKAL1	COL1A2	COL6A2	COL6A3	COPB2	DYNC1H1	ERCC2	EXOC2	EXOC7	GDI1	HGS	IGFBP5	ITGA5	LOX	MYH9	MYO9B	NECAP2	NOTCH2	NUP153	OCRL	PFN2	PIK3R3	PPP2R5D	RAB23	RANGAP1	RHOC	RRP36	SERPINE1	TBC1D1	TRIO	VAMP7	WDR46	YKT6	ZDHHC2
BMS-536924	na	AKT1	AMPH	ARF4	BNIP1	CDH2	CDKAL1	COL1A2	COL6A2	COL6A3	COPB2	DYNC1H1	ERCC2	EXOC2	EXOC7	GDI1	HGS	IGFBP5	ITGA5	LOX	MYH9	MYO9B	NECAP2	NOTCH2	NUP153	OCRL	PFN2	PIK3R3	PPP2R5D	RAB23	RANGAP1	RHOC	RRP36	SERPINE1	TBC1D1	TRIO	VAMP7	WDR46	YKT6	ZDHHC2
BMS-536924_md2	module_2	ABHD5	ADAMTS1	ADAMTS12	ADAMTSL1	AOX1	CUL4B	DAXX	DDAH1	DHDDS	GLYATL2	GNAI2	GNB4	GNMT	GUCY1B1	INSIG1	MED8	PDCD1LG2	PFDN6	PRPS1	STARD3	THY1	TPMT
BMS-708163	na	ABCB7	AK2	AOC2	ASNS	CHCHD4	COX10	COX7A2L	CTH	CYC1	EIF3D	GNL3	HSCB	IARS	IDH3A	MARS	MTHFD2	MYBBP1A	NOC2L	NSUN4	PANK4	PDCD11	PEMT	PFDN2	PHF5A	POLR3D	RIOK1	RPF2	RPS18	SARS	SDHB	SF3A1	SNRNP40	SNRPA1	SPHK1	TAF12	TAF4B	THOC1	THOC5	TIMM44	UQCRH	UTP6	WDR3	XPOT	YARS	ZMAT5	ZNF143
BMS-754807	na	ASH2L	ATOX1	ATP6AP2	CAMP	CAP2	CENPI	CYB5R1	EXOC2	GGH	IGFBP5	IMPDH1	LGALS1	MT2A	PACSIN3	PSMB6	PSMD10	RBX1	TPMT	UROD	VAMP7	YKT6
BX-795	na	AACS	ABCA12	ABCA7	ACAA1	ACADS	ACOX1	ACSL1	ACSS1	ATP1A1	ATP5F1E	ATP6V0D1	ATP6V0E2	ATP6V1C1	ATP6V1G1	ATP6V1H	COX5A	COX5B	COX6B1	COX6C	DHCR24	DHCR7	DHTKD1	DLD	ETFA	FASN	FDPS	HADH	HADHA	HMGCS1	IDI1	MCCC1	MCCC2	MT-ND1	MT-ND4	MVK	NDUFA2	NDUFAB1	NDUFB9	NR1H3	PDSS1	PPA2	RTN4R	SDHC	SLC27A3	SLC5A6	STARD3	TFRC	UQCR10
BX-795	na	AACS	ABCA12	ABCA7	ACAA1	ACADS	ACOX1	ACSL1	ACSS1	ATP1A1	ATP5F1E	ATP6V0D1	ATP6V0E2	ATP6V1C1	ATP6V1G1	ATP6V1H	COX5A	COX5B	COX6B1	COX6C	DHCR24	DHCR7	DHTKD1	DLD	ETFA	FASN	FDPS	HADH	HADHA	HMGCS1	IDI1	MCCC1	MCCC2	MT-ND1	MT-ND4	MVK	NDUFA2	NDUFAB1	NDUFB9	NR1H3	PDSS1	PPA2	RTN4R	SDHC	SLC27A3	SLC5A6	STARD3	TFRC	UQCR10
BX-795_md2	module_2	ACO2	ACPP	ACSS2	ADCY6	ADRB1	AFG3L2	AHCYL2	ALAD	APH1A	AQP8	ARFGAP2	ARHGAP39	ARHGAP45	ARHGEF11	ARHGEF16	ARRB1	ASAH1	BCL2L1	BRAF	CBLC	CCL28	CDH1	CFTR	CLCN2	CTPS2	DNAJC19	DNAJC5	DPP7	ENTPD6	ERBB2	ESRRA	EXOC6	F12	FGD4	FGFR4	FLAD1	GAB1	GBA	GGA2	GHR	GLUD2	GMIP	GNMT	GPD1L	GPD2	GPR143	HMOX2	HSPA1B
BX-912	na	ABCC2	ABCG2	ACADS	ACOT8	ACSS2	AHR	ASAH1	ATP6V1E1	BCL2L1	CERS2	CXCL2	CXCL8	CYB5A	EDEM1	EDEM2	EFNA1	FUCA1	GALE	GBA	GPAT3	HIBADH	HSPA1B	ICAM1	IL18	IL6R	MAP2K3	MAP3K1	MET	MGAT4B	MGST1	MITF	NAMPT	NEDD4L	PIK3CB	PLPP2	PRKCD	PRKCZ	PXN	SDC4	SDHC	SERINC3	SLC39A1	SQSTM1	SUCLG2	TALDO1	THRB	TKT	TNFRSF21
Bicalutamide	na	CPSF3	EZH2	HDAC2	KHDRBS1	NUDC	PDCD11	POU2F1	SF3B6	SKP2	SRRM1
Bleomycin	na	AKAP9	ARHGAP20	ARPC1A	CACNG1	CACNG4	CAMK2B	CHGA	CNTN1	DNAJC5	GHR	GNAO1	GSTA1	GSTA2	GUSB	KCNB1	KCNMB2	KIF3B	KIFAP3	NAGK	NAPA	NCOA6	NRCAM	PCSK2	PIGU	PIK3R3	PLXNA2	PNPLA7	PTPRN2	SCG3	VAV3	YWHAB
Bleomycin_50uM_	na	ABCB10	ACO2	ACSL1	ACSL6	ACVR2A	ALDH1A1	ALOX15	AQP5	ARSD	ATP13A2	ATP13A4	ATP5MC1	ATP5ME	ATP6V0A1	ATP6V0B	ATP6V0D1	ATP6V0E2	ATP6V1F	B3GNT2	B3GNT8	B4GALT3	BAMBI	BCO1	BMP7	COX5A	COX5B	COX6B1	COX6C	CPLX1	CPT1A	CTPS2	CYB5A	CYP2D6	CYP3A5	DCK	DCXR	DGKQ	DLD	DLL4	DNAJC11	DNAJC19	DNAJC5	DTX1	ENTPD5	ENTPD6	ENTPD8	EPHA8	EPHB1
Bosutinib	na	ADCY6	AKT2	ARHGEF2	ARID1A	AXIN2	BAMBI	BMP4	BRPF1	CDON	CERS2	CHN1	CHPT1	DNMT3A	DOT1L	E2F6	EAF1	EPC1	FADS2	FAM13A	FGFR4	GSK3A	GTF3A	HDAC6	HNRNPUL1	INSM1	INSR	KALRN	KCNH2	KMT2C	LPIN2	MAP2K6	NAPA	NKX3-2	NLK	NSF	PABPN1	PDE8B	PHC2	PKN1	PLIN2	POLR2I	PTPRN2	RAB3A	RBM5	RGL1	RORA	SETD7	SETDB1
Bryostatin1	na	CEP57	CHEK2	CKAP5	HNRNPF	IQCB1	KIF5B	NCL	NUDT5	NUP133	RBM17	RPIA	SAFB	SRP72	THOC1	TOP1	UPF2	VRK1
CAY10603	na	ACSS2	AKR1B10	ALDH3A1	ALDH3A2	ALPP	ETFB	FOS	ME1	NCOA3	NDUFS6	PGD	PPCS	PSEN1	SDHA	SGPP1	SHMT1	TMED10	TRADD	YWHAB
CCT007093	na	AK2	BDP1	CCNH	DDX55	DIMT1	E2F3	EIF4EBP1	ELAVL1	EXOSC10	GNL3	IPO5	KHDRBS1	KIF2A	LAS1L	LYAR	MDN1	MTREX	NOP14	NUDC	NUP54	OGT	PA2G4	PHC2	POLR3G	PSIP1	PUM3	RAN	RBMX	RIOK1	RNGTT	RPL14	RRP9	SF3A3	SNRNP40	SRP19	TEX10	TNPO1	UTP15	WDR12	WDR36
CCT018159	na	ABCB1	ACADS	ACSL1	ALDH1A1	ALOX15	ATP5F1B	ATP5PF	ATP6V0A1	ATP6V0A2	ATP6V0B	ATP6V0E2	ATP6V1A	BCL2	CD63	CFTR	CHCHD3	CLCN2	COX11	COX20	COX5B	COX6B1	CYP2D6	DLD	DNAJC19	ERLIN2	EZH2	FBP1	FGF9	GHR	GLUD2	GLYCTK	GPAT4	GPX6	HMGCS1	IDI1	INSIG1	INSR	IRS2	KAT2B	LSS	MBOAT1	MPC1	NAPA	NCK2	NDUFA2	NDUFB2	NDUFB3	NSF
CEP-701	na	ACOX1	ACTL6A	ANAPC7	ARID4A	ARID4B	ATAD2	BARD1	BRD2	CPT1A	EBAG9	EED	EGR1	EHMT1	EPC1	GATA2	GATA3	KAT7	KDM2A	KLF4	KMT2A	MED1	MRGBP	NCOA3	NFRKB	NR1H3	NR2F6	PARD6B	PPARG	PRPF3	PRPF6	STARD3	TAF4	TAF5L	TEAD3	THRB	TNFRSF21	VDR
CHIR-99021	na	ACD	ACO2	ACTL6A	ACTR5	AGO4	ANP32A	ARID1A	ASXL2	ATP5F1B	ATP6V0A2	ATP6V0B	ATP6V1C2	ATP6V1E2	ATP6V1G1	ATXN7L3	BAZ2A	BLM	BRD1	CCNE2	CDC7	CEP131	CEP72	CEP76	CEP97	CHD8	CHEK2	CNTRL	COX5A	COX6C	CPSF2	CPSF7	CPT1A	CSTA	CSTF1	CTCF	CTSH	CTSV	CYC1	DGCR8	DHCR7	DICER1	DLL1	DLST	DNA2	DOT1L	E2F2	EDARADD	EDC3
CHIR-99021	na	ACD	ACO2	ACTL6A	ACTR5	AGO4	ANP32A	ARID1A	ASXL2	ATP5F1B	ATP6V0A2	ATP6V0B	ATP6V1C2	ATP6V1E2	ATP6V1G1	ATXN7L3	BAZ2A	BLM	BRD1	CCNE2	CDC7	CEP131	CEP72	CEP76	CEP97	CHD8	CHEK2	CNTRL	COX5A	COX6C	CPSF2	CPSF7	CPT1A	CSTA	CSTF1	CTCF	CTSH	CTSV	CYC1	DGCR8	DHCR7	DICER1	DLL1	DLST	DNA2	DOT1L	E2F2	EDARADD	EDC3
CHIR-99021_md2	module_2	ANAPC11	ANAPC16	ANAPC7	AQR	ARF1	ARF6	ARFGAP2	ARHGAP19	ARHGAP30	ARHGAP45	ARHGEF4	ARHGEF7	ATAD2	ATF1	BCL2L11	BRAF	CAPN1	CDC25A	CDC6	CDCA5	CDK8	CDT1	CNOT1	CNOT10	CNOT6	CNOT9	COL17A1	CRKL	CYTH1	DCAF5	DDX23	DHX15	DHX8	DKC1	DSG3	EIF4A2	EIF4A3	EIF5	EXOC6	FASLG	FAU	FOSB	FOXO4	GFM1	GGA1	GLMN	HIST1H2AC	HIST1H2AG
CHIR-99021.1	na	ANAPC16	ANAPC7	CASP9	CDC25A	CNOT1	CNOT6	CPSF7	DDX23	DHX15	DHX8	DLL1	EHMT1	EIF4A3	HNRNPF	JAG2	LIN52	MRPS7	MRPS9	NUP210	PAIP1	PAPOLA	PCF11	PRPF39	PSEN1	PTBP1	RPL22	RPS29	SF1	SKP2	SMG7	SNW1	SRP54	SRP68	SRSF2	SRSF5	SRSF7	SSU72	TFDP1	WDR33	ZC3H8
CHIR-99021.1	na	ANAPC16	ANAPC7	CASP9	CDC25A	CNOT1	CNOT6	CPSF7	DDX23	DHX15	DHX8	DLL1	EHMT1	EIF4A3	HNRNPF	JAG2	LIN52	MRPS7	MRPS9	NUP210	PAIP1	PAPOLA	PCF11	PRPF39	PSEN1	PTBP1	RPL22	RPS29	SF1	SKP2	SMG7	SNW1	SRP54	SRP68	SRSF2	SRSF5	SRSF7	SSU72	TFDP1	WDR33	ZC3H8
CHIR-99021.1_md2	module_2	ALDH6A1	ARID1A	CDC7	CHD8	CKB	CPT2	CTCF	CTH	DHCR7	DHTKD1	DICER1	DROSHA	FOS	GLUL	GNPNAT1	GOT1	GOT2	HIST3H2A	HMGCS1	IDH1	ISG20L2	KAT7	MAOA	MED28	MED30	MMACHC	MTA1	NEIL1	NFRKB	NSUN2	PANK1	PFKFB2	RAD1	RCOR1	RXRA	SMARCD2	SUDS3	SUPT16H	SYNE2	TADA1	TIMELESS	TRMT5	VHL	XRCC3	YEATS4
CI-1040	na	AGO3	AHCTF1	ALMS1	ANAPC7	ARHGAP10	ARID4B	ARL3	ASF1A	BARD1	BRD8	CBX5	CCAR1	CCNC	CCNE2	CCP110	CDC25C	CDC5L	CDC7	CDCA5	CDCA8	CDK19	CENPE	CENPQ	CEP70	CEP76	CEP89	CHEK1	CKAP5	CLU	DLGAP5	DNA2	DNMT1	DNMT3B	DROSHA	E2F2	ECT2	EHMT1	EPC1	FANCG	FBXO4	FBXO5	FGFR1OP	GEMIN2	GMNN	HAT1	HMGCS1	HNRNPA0	ID1
CI-1040	na	AGO3	AHCTF1	ALMS1	ANAPC7	ARHGAP10	ARID4B	ARL3	ASF1A	BARD1	BRD8	CBX5	CCAR1	CCNC	CCNE2	CCP110	CDC25C	CDC5L	CDC7	CDCA5	CDCA8	CDK19	CENPE	CENPQ	CEP70	CEP76	CEP89	CHEK1	CKAP5	CLU	DLGAP5	DNA2	DNMT1	DNMT3B	DROSHA	E2F2	ECT2	EHMT1	EPC1	FANCG	FBXO4	FBXO5	FGFR1OP	GEMIN2	GMNN	HAT1	HMGCS1	HNRNPA0	ID1
CI-1040_md2	module_2	ALKBH5	AR	ARMC8	ATF2	ATG5	CAMK2B	CCNA2	CDKN1B	CEBPG	CYR61	ELAVL1	ENAH	EVL	FOXG1	FOXO3	FZD2	H2AFV	HDAC2	ID2	JUN	MAML1	MAP3K7	MAPK8	MAPK9	MBIP	MYL6	NELFE	NOTCH3	NRBP1	PAF1	PARP2	PHKB	POU4F2	PPP1CB	PPP2R3B	PRKAA2	PSENEN	RAF1	RANBP9	ROR2	RTF1	SDC2	SIRT1	TLE2	WTAP
CP466722	na	ARHGEF1	ASPA	ATP1A1	B4GALT5	CHCHD3	CPN1	DCT	EDEM1	EDNRB	FBXO7	GK	HEY1	INPP1	KCNAB2	LAMA1	LCP2	LIPE	MAD1L1	MAP2K3	MFN2	MLANA	MMP8	PTPN1	QDPR	SLC1A4	SLC45A2	ST3GAL4	ST3GAL6	STXBP1	TNFRSF14	TYR	TYRP1	VAMP3	XYLB
CP724714	na	ABI2	ABL2	ACSL4	ACTA2	ACTN1	ADCY3	AKT3	AMPD2	APH1B	ARL13B	ARPC1B	ARPC5	ATF2	ATM	AXL	B4GALT6	BBS7	BBS9	CALD1	CAPZA1	CAV1	CCNH	CD44	CDC27	CDK6	CERS5	CHST11	CHST14	CHSY1	CNEP1R1	COL4A1	COL6A1	COL6A2	CTPS1	DDR2	DPYSL2	EFEMP2	FBXW11	FN1	FYN	GIT2	GNAI2	GNAI3	GNB5	GNG11	GNG12	GNPDA2	IGF2BP2
CP724714	na	ABI2	ABL2	ACSL4	ACTA2	ACTN1	ADCY3	AKT3	AMPD2	APH1B	ARL13B	ARPC1B	ARPC5	ATF2	ATM	AXL	B4GALT6	BBS7	BBS9	CALD1	CAPZA1	CAV1	CCNH	CD44	CDC27	CDK6	CERS5	CHST11	CHST14	CHSY1	CNEP1R1	COL4A1	COL6A1	COL6A2	CTPS1	DDR2	DPYSL2	EFEMP2	FBXW11	FN1	FYN	GIT2	GNAI2	GNAI3	GNB5	GNG11	GNG12	GNPDA2	IGF2BP2
CP724714_md2	module_2	ACADM	ACO1	ARSK	CIAO2B	DGUOK	ECHDC1	ESD	GBE1	GFPT2	GSTO1	IGFBP6	NNMT	NNT	PGM1	SERPINE2	SLC25A37	SOAT1	UROD
CUDC-101	na	AKR1B10	ALDH1A1	ARL6IP5	G6PD	GALNS	GLB1	GLS	GNPDA1	GPAT3	HKDC1	HSD3B1	JADE2	ME1	NNMT	NUDT7	PARP4	QPRT	SGPP1	TKT	TPK1	UGDH
CUDC-101	na	AKR1B10	ALDH1A1	ARL6IP5	G6PD	GALNS	GLB1	GLS	GNPDA1	GPAT3	HKDC1	HSD3B1	JADE2	ME1	NNMT	NUDT7	PARP4	QPRT	SGPP1	TKT	TPK1	UGDH
CUDC-101_md2	module_2	ABCC2	ABCC3	ABCG2	ASPH	BLVRB	ETFB	HMOX1	ITGB1	ITGB5	PLIN2	PPARG	SEC23A	TFPI	VAMP3	YME1L1
CX-5461	na	AKR1B10	ALDOA	BAD	CD59	DBNL	EPAS1	G6PD	GNG12	NDUFA2	PSMA7	PTPN1	S100A10	SDC4	SDHC	UQCRQ	YWHAB
CX-5461	na	AKR1B10	ALDOA	BAD	CD59	DBNL	EPAS1	G6PD	GNG12	NDUFA2	PSMA7	PTPN1	S100A10	SDC4	SDHC	UQCRQ	YWHAB
CX-5461_md2	module_2	ATOX1	ATP6V0E1	BLVRA	COMMD7	EPHX1	GPNMB	MGST3	MRGBP	POLR2L	TK1	TSEN34	UBE2D4
Camptothecin	na	ACOX1	ACVR2A	ACY3	ADCY6	ADRA2C	ADRB1	AGPAT2	AKT2	ARF6	ARHGAP45	BAMBI	BCL2L1	BMP7	CAMK2D	CAT	CATSPERB	CDH1	CDIPT	CPT1A	DGKQ	DNAJC19	E2F1	ENTPD6	ENTPD8	ERBB2	FABP1	FGFR4	FOXO4	GAB1	GFPT1	GGPS1	GHR	GMIP	GPD1L	GPI	HMGCS1	HMGCS2	HSPA1B	HSPA2	IDH1	KALRN	KIF13B	KIF3B	KMT2C	LMNA	LPAR2	MAPK3	MBOAT1
Cetuximab	na	AEN	BYSL	CDC34	DCUN1D4	DDX55	EIF4EBP1	ELAVL1	ELOA	EPS15L1	EXOSC10	EXOSC4	EXOSC5	FARSA	GAR1	GNL3	GTF3A	HARS	HSPA9	IARS	KHSRP	KRI1	LARS	LARS2	MARS	NGDN	NHP2	NOC2L	NOP56	NSUN6	PABPN1	PAK1IP1	PDCD11	PKN1	POLR3A	POLR3D	POLR3G	POLR3GL	POLR3H	PPP2R5D	RBM28	RBM5	RIOK2	RRP1	RRP9	SAE1	SLC25A6	SUGP1	THOC5
Cetuximab	na	AEN	BYSL	CDC34	DCUN1D4	DDX55	EIF4EBP1	ELAVL1	ELOA	EPS15L1	EXOSC10	EXOSC4	EXOSC5	FARSA	GAR1	GNL3	GTF3A	HARS	HSPA9	IARS	KHSRP	KRI1	LARS	LARS2	MARS	NGDN	NHP2	NOC2L	NOP56	NSUN6	PABPN1	PAK1IP1	PDCD11	PKN1	POLR3A	POLR3D	POLR3G	POLR3GL	POLR3H	PPP2R5D	RBM28	RBM5	RIOK2	RRP1	RRP9	SAE1	SLC25A6	SUGP1	THOC5
Cetuximab_md2	module_2	ACTR1A	AGPAT1	ANK2	AP1M1	AP1S2	APH1B	APPL1	ARHGEF2	BRPF1	CDK4	CHN1	CHPT1	CNOT10	COPS8	DCAF1	DCAF16	DOCK7	DOT1L	DPYSL4	DYNC1LI1	EBF1	FAAP20	FANCB	FYN	GATAD2A	GDI1	GGA1	GSPT1	HDAC2	IMPDH2	INTS9	KHDRBS3	LPIN1	MSL3	NCKIPSD	NR2F1	OSGEP	PAICS	PFDN2	PFDN6	PHC2	PLCG1	PRKAR2A	RAB8B	RAD18	RBPJ	RHOA	RPA2
Cisplatin	na	AACS	ACOX1	ACSL1	ACSL5	ACVR1B	ACY3	AGPAT2	ARHGAP45	AXIN2	BMP4	CASP6	CFTR	CLOCK	CPLX1	CPT1A	DGKQ	DNAJC19	DNAJC5	FABP1	GMIP	HMGCS2	HNF4A	IDH1	IHH	KIF3B	MAOA	MYB	NCOA6	NOX1	NSF	NUMA1	PCK1	PEX1	PEX11A	PEX7	PIK3AP1	PKP4	PLPP2	RAB11A	RORC	SOX9	SPOPL	VAV1
Cytarabine	na	AACS	ACOT8	AGPAT2	ARFGAP2	ATP6V0B	BCAP31	CLTB	COX6C	CSTF1	DCTN5	DDX23	DGKZ	DNAJC5	DOLPP1	EAF2	GMDS	HSPA1B	KIF3B	MED25	MRPS11	MRPS18A	NAPA	NCOA6	NELFCD	NFYA	NSDHL	OSGEP	PIGU	PMVK	PRPF6	RAB11A	RPN2	SEC11C	SNRPD3	SSNA1	SSR4	STS	TAF4	TSTA3	UPF1
DMOG	na	ACO2	ADCY2	ADCY5	ADM2	ADRA2C	AP1S1	ARF5	ATP2A1	ATP2A3	ATP5F1D	AVP	AXIN2	BMP7	CACNB4	CARM1	CATSPER4	CATSPERG	CD28	CD4	CDK5	CDK8	CNTFR	COX5B	COX6C	CSK	CSTF1	DNM2	DOK3	DPP7	DTNBP1	DUSP2	EAF2	ELL	ELOB	ENTPD8	ESR2	FGFR4	FLT4	GHRHR	GMIP	GNB2	GNRH2	GPR55	GTF3A	GTF3C5	HIST1H3A	HIST1H3B	HIST1H3C
Dabrafenib	na	ABCA7	ABCF1	ABRAXAS2	ACTL6A	ACVR1B	ADAR	AGO3	AHCTF1	ALCAM	ALMS1	ANAPC16	ANOS1	APLP2	ARHGAP11A	ARHGAP35	ARHGAP44	ARHGEF18	ARID4A	ARID4B	ASF1A	ATP1B1	B3GNT4	B4GALT1	BARD1	BCAT2	BORA	BRD2	BRD8	BRF2	CAMK2G	CAPN1	CASK	CASP6	CCAR1	CDC25C	CDC5L	CDCA5	CDCA8	CDK1	CDKN1B	CENPE	CENPQ	CEP192	CEP57	CEP70	CEP76	CHD8	CHTF18
Dabrafenib	na	ABCA7	ABCF1	ABRAXAS2	ACTL6A	ACVR1B	ADAR	AGO3	AHCTF1	ALCAM	ALMS1	ANAPC16	ANOS1	APLP2	ARHGAP11A	ARHGAP35	ARHGAP44	ARHGEF18	ARID4A	ARID4B	ASF1A	ATP1B1	B3GNT4	B4GALT1	BARD1	BCAT2	BORA	BRD2	BRD8	BRF2	CAMK2G	CAPN1	CASK	CASP6	CCAR1	CDC25C	CDC5L	CDCA5	CDCA8	CDK1	CDKN1B	CENPE	CENPQ	CEP192	CEP57	CEP70	CEP76	CHD8	CHTF18
Dabrafenib_md2	module_2	ANAPC7	ATAD2	BAD	BCL2L11	BTG2	BUB3	CCNA2	CCND2	CCNK	CD2AP	CDC20	CDC23	CDH1	CDH24	CDT1	CHEK1	CHEK2	CKAP5	CNOT1	CNOT6	CNOT8	CPT1A	CTNND1	DGKA	DGKD	DGKE	DGKH	DTX2	DUSP1	EGR1	EIF4A3	FBXO27	FBXO30	FBXO4	FBXO5	FBXW7	FOS	FOSB	FOXL2	FOXO3	GNA15	H2AFX	HNRNPF	IMPA2	IRF1	ITPKC	JMJD1C	JUN
Docetaxel	na	ABCB1	ACSL6	ALDH1A1	APOA4	AQP11	ARSD	ARSE	BCO1	CHDH	CYB5A	CYP2C19	CYP2D6	CYP2J2	CYP3A5	DGKQ	GAK	GK	GPAT4	GPD1L	GPX6	GSTK1	LIPC	LPIN2	MAOB	MAPK3	MBOAT1	MGST3	MOGAT3	NAT2	NPPA	NR1I2	PAFAH1B3	PAFAH2	PLA2G12A	PLA2G16	PNMT	RBP2	SELENOI	SEMG1	SLC35A2	SRD5A3	STS	UGT2B7
Docetaxel	na	ABCB1	ACSL6	ALDH1A1	APOA4	AQP11	ARSD	ARSE	BCO1	CHDH	CYB5A	CYP2C19	CYP2D6	CYP2J2	CYP3A5	DGKQ	GAK	GK	GPAT4	GPD1L	GPX6	GSTK1	LIPC	LPIN2	MAOB	MAPK3	MBOAT1	MGST3	MOGAT3	NAT2	NPPA	NR1I2	PAFAH1B3	PAFAH2	PLA2G12A	PLA2G16	PNMT	RBP2	SELENOI	SEMG1	SLC35A2	SRD5A3	STS	UGT2B7
Docetaxel_md2	module_2	ABCB10	ACVR2A	ADCY5	ADCY6	ADORA1	ADRA2A	AFDN	AHCYL2	AKT2	ALAS1	AMPD1	ARF1	ARHGAP12	ARHGAP45	ARRB1	ASAH1	ATP5ME	ATP6V0A1	AXIN2	BCL2	BCL2L1	BMP4	C4BPB	CAPZA2	CCL1	CCR9	CD79B	CDH1	CERS2	CFTR	CLCN2	CLCN3	CLOCK	COX5B	COX6C	CTPS2	CYSTM1	DHX15	DMTN	DNMT3A	DOK4	DTX1	ELOVL7	ENPP3	ENTPD6	ENTPD8	ERBB3	ESRRG
Doxorubicin	na	ABCB1	ARPC1A	BLVRB	CKMT2	CYB5A	CYP4F3	DHH	EPHX1	GHRHR	GNB2	GSTA2	GSTK1	LRP2	MAPK3	MGST3	MOGAT3	POR	RBP2	SLC6A4	TALDO1	WASL
EHT1864	na	ARAP3	ARHGDIB	ARHGEF1	CAV1	CD44	CGAS	EFNB2	EPHA2	F3	GBP1	GBP2	HLA-A	HPSE	HSPG2	IFI16	IFI27	IFIT2	IFIT3	IFITM3	ITGA2	ITGA6	LAMA3	LAMB3	LAMC2	LDLR	LPCAT2	LPCAT4	OAS1	OASL	PLA2G4A	PTGS2	PXN	SP100	TMEM173
EKB-569	na	A2M	ABI2	ABL2	ACTR1A	ADAMTS2	ANGPT1	ANXA5	ANXA6	APH1B	ARHGEF6	ARSB	B4GAT1	CACNA1A	CALD1	CAP2	CAPZA1	CDK5R1	CDK5RAP2	CHST10	CHST14	CHSY1	COL1A2	COL3A1	COL5A2	COL6A1	COL6A2	COL6A3	CSGALNACT2	CSNK1E	CSPG4	CTSK	DDR2	DNER	DPYSL2	DPYSL3	DPYSL4	DYNC1LI1	EFEMP2	FBN1	FGF2	FLNC	GDI1	GIT2	GNB4	GNB5	GNG11	GPC6	ITGA4
EKB-569	na	A2M	ABI2	ABL2	ACTR1A	ADAMTS2	ANGPT1	ANXA5	ANXA6	APH1B	ARHGEF6	ARSB	B4GAT1	CACNA1A	CALD1	CAP2	CAPZA1	CDK5R1	CDK5RAP2	CHST10	CHST14	CHSY1	COL1A2	COL3A1	COL5A2	COL6A1	COL6A2	COL6A3	CSGALNACT2	CSNK1E	CSPG4	CTSK	DDR2	DNER	DPYSL2	DPYSL3	DPYSL4	DYNC1LI1	EFEMP2	FBN1	FGF2	FLNC	GDI1	GIT2	GNB4	GNB5	GNG11	GPC6	ITGA4
EKB-569_md2	module_2	ADCY1	AKT3	ANKRD28	AP1M1	AP1S2	AP2S1	ATF2	BLMH	C3AR1	CAMK4	CCNH	CDC16	CDC27	CDC42	CDH2	CDON	COPS6	COPS8	CREB3L2	CUL4B	DET1	DZIP1	EPS15	EPS15L1	ERCC1	F2R	FGFR1	FYN	GAS1	GFPT2	GLI3	GNAI2	GNB3	IFT81	KAT2B	KLHL20	LEF1	MAD1L1	MAP2K2	MEF2C	MME	MMP2	MPV17	NCAM1	PDGFRB	PIK3CD	PIN1	PLCG1
EX-527	na	BRIX1	CWC22	DSG2	EIF5B	ELF1	GTPBP4	KARS	MRPS10	OSBP	PMAIP1	PSMD7	STXBP2	TNFRSF10A	UPF2
Elesclomol	na	AACS	ABI1	ACADS	ACOX1	ACSL5	ACSL6	ACSM3	ACY3	AGPAT2	ALG3	ALOX5	ANAPC5	ANO1	ARF1	ARF6	ASL	AXIN2	B3GNT2	B3GNT8	B4GALT3	BCL2L1	CCRL2	CD79A	CDH1	CFTR	CLCN2	CLCN3	COASY	CRYL1	CYB5A	CYP2D6	CYP3A5	DGKQ	DHRS4	ESRRA	FABP1	FABP6	FOXA3	FOXO4	FZD5	GALNT12	GCNT3	GFPT1	GLYCTK	GMDS	GMIP	GPD2	GRM8
Embelin	na	ABCA7	BRCC3	DOK2	MYO5B	NAPB	NCOA6	PMVK	RAB6A	RAD51D	SPTLC2	STXBP2	TRAPPC2L	TRAPPC5	VPS35	VTI1A	YWHAB
EpothiloneB	na	ARHGAP20	ATP5F1E	ATP5PF	ATP6AP2	ATP6V0E2	BAMBI	CD63	COX6C	DHH	ELMO2	EPN1	FMOD	GHR	GPAT4	GRB2	HGSNAT	HS3ST5	KCNB1	LRP2	NAGLU	NAPA	NDUFB2	NRCAM	NSF	PAG1	RHOBTB2	RPN2	RTN4RL1	SDHC	ST3GAL4	SUMF1	TGFB3	XYLT1
Etoposide	na	ARHGAP1	ARPC1A	ATP6V0D1	ATP6V0E1	BAIAP2	CAPZA2	CDH1	CLCN7	HMGCS2	KALRN	KIF3B	LAMP1	MAPK3	MYO18A	NCOA6	NR1H3	NRIP1	RAB22A	WASL
FH535	na	ACKR3	ANOS1	ARNTL	BDKRB1	CD47	CHST15	COL12A1	COL17A1	COL5A1	CTNNBL1	DLG1	DSE	EGFR	EPAS1	F3	FOXO3	GALNT5	GAS6	GCNT1	GPC1	ITGA2	LAMA3	LAMA5	LAMB3	LAMC2	LCN2	LPAR1	MED6	NCOA6	NFKBIA	NGF	NMU	PPP1CB	PPP3CA	SDC1	SDC4	SLC2A1	ST6GALNAC5	TAX1BP3	TGFBI	THBS1	VDR
FK866	na	ACTN4	ACTR3C	ALDOA	AP1S1	ARHGAP35	ARPC1A	ARPC1B	BAIAP2	BCAR1	CAPN1	CAPZA2	CD63	CD9	CDH1	CLTB	CTNND1	DBNL	DOK5	DPP4	EGF	EPN1	EPS8	ERBB2	FBXW5	FTH1	IGFBP5	ITGA3	ITGB5	LAMP1	MAP3K1	MET	MYH9	MYL6	NAPA	PAG1	PAK4	PDGFB	PKP4	STX4	TAGLN2	TALDO1	TNFRSF1A	TRPC4AP	VTI1A	WASL	WDR1	ZYX
FK866	na	ACTN4	ACTR3C	ALDOA	AP1S1	ARHGAP35	ARPC1A	ARPC1B	BAIAP2	BCAR1	CAPN1	CAPZA2	CD63	CD9	CDH1	CLTB	CTNND1	DBNL	DOK5	DPP4	EGF	EPN1	EPS8	ERBB2	FBXW5	FTH1	IGFBP5	ITGA3	ITGB5	LAMP1	MAP3K1	MET	MYH9	MYL6	NAPA	PAG1	PAK4	PDGFB	PKP4	STX4	TAGLN2	TALDO1	TNFRSF1A	TRPC4AP	VTI1A	WASL	WDR1	ZYX
FK866_md2	module_2	ACOX1	AGPAT3	AKR1B10	ALG1	ARF5	ARL1	ARSD	CCND1	CLOCK	CYP4B1	DHCR24	EHD1	ELOVL1	GBA	GCC1	GORASP2	HSD3B7	ME1	MGAT4B	MVK	NSDHL	ORMDL3	PLEC	RAB1B	RAB21	RAB22A	RARA	SDSL	SGMS2	SLC35C1	SRD5A3	STS	SUMF1	TEAD3	TNFRSF21	TRAM1	TSTA3	UGDH	VPS52
FR-180204	na	COL1A2	COL3A1	COL5A1	COL6A2	COL6A3	DDR2	FGF2	ITGA5	LOX	NID1	P3H1	PDGFRB
FR-180204	na	COL1A2	COL3A1	COL5A1	COL6A2	COL6A3	DDR2	FGF2	ITGA5	LOX	NID1	P3H1	PDGFRB
FR-180204_md2	module_2	ACTR1A	AMPD2	AP1M1	BSG	CAP2	CD99	CSNK1E	CSTF3	DCTN4	E2F7	ERCC2	EXOC2	INHBE	MAD2L2	MME	NEDD4	PFN2	POLR3D	PPP2R5D	PSMD5	RAB8B	SEC13	SERPINE1	SF3A3	TCF4	TGFB1	TOP3A	TTBK2	VPS37A	WASF1	ZEB1	ZMAT5
FTI-277	na	ATAD5	BLM	CDC25A	CHEK1	E2F2	HMGB1	IP6K2	LIG1	LSM7	MCM2	MCM3	MCM4	MCM7	NCL	NFRKB	NUP35	PARP1	PBRM1	POLD1	POLE2	PRIM1	RBBP7	RFC3	RMI2	SAP130	SMARCC1	SNRNP200	SNRPA	SRSF1	SRSF2	SRSF7	SUZ12	TAF4	TIMELESS	TOPBP1	UBTF	VRK1
FTI-277	na	ATAD5	BLM	CDC25A	CHEK1	E2F2	HMGB1	IP6K2	LIG1	LSM7	MCM2	MCM3	MCM4	MCM7	NCL	NFRKB	NUP35	PARP1	PBRM1	POLD1	POLE2	PRIM1	RBBP7	RFC3	RMI2	SAP130	SMARCC1	SNRNP200	SNRPA	SRSF1	SRSF2	SRSF7	SUZ12	TAF4	TIMELESS	TOPBP1	UBTF	VRK1
FTI-277_md2	module_2	BCKDHB	CAD	COX6B1	DHTKD1	HIBCH	MP68	MRPS25	NDUFB1	NDUFS3	PTCD3	SLC5A6	TIMM13
GDC0941	na	ADCY1	CDK4	CTNNB1	DUSP6	ENTPD6	FANCL	FYN	GAB2	RPS6KA3	SCN1A	SMG5
GDC0941_rescreen_	na	AES	ATP6V0A2	ATP6V0B	ATP6V1C2	CDC34	CDK5R1	CHD4	CNTN1	COX5A	CSK	DLL4	DOT1L	DVL2	E2F6	ERCC3	ETV4	FBXW7	FYN	GATAD2A	HEY1	KAT2B	LEF1	PTPRZ1	PYGO2	RAD23A	RGS16	RRN3	UBE2M	UQCRH
GSK1070916	na	ADCY9	CD63	CD68	CST3	CTNNA1	CTSB	CYB5R3	EDEM1	FAH	GALE	GLB1	GPX1	ICAM1	ITGB5	MPG	NAGLU	OGDH	P4HB	PDIA3	PRKCE	PXN	RHOC	SERINC3	SUCLG2	TALDO1	TIMP1	TIMP2	TKT	UGDH	VEGFB
GSK1070916	na	ADCY9	CD63	CD68	CST3	CTNNA1	CTSB	CYB5R3	EDEM1	FAH	GALE	GLB1	GPX1	ICAM1	ITGB5	MPG	NAGLU	OGDH	P4HB	PDIA3	PRKCE	PXN	RHOC	SERINC3	SUCLG2	TALDO1	TIMP1	TIMP2	TKT	UGDH	VEGFB
GSK1070916_md2	module_2	ABCC2	ASPH	ATOX1	CTSZ	GBA	GPAT3	HIBADH	IL6R	LY96	MGRN1	MVP	NPC1	PIP4K2A	PLA2G15	RILP	STAM	TAS1R3
GSK269962A	na	ACSL1	AFDN	ALDH1A3	ARF6	ARHGAP32	ARHGAP39	ARHGDIB	ARHGEF16	BAIAP2	BARD1	BLM	CAPN1	CBLC	CDC6	CDH1	CDT1	COL17A1	CTNND1	CYP2S1	CYTH1	DAPP1	EFNA1	ESRRA	EZR	FGD3	FGD4	FOS	GMIP	GPD2	HSD17B2	IFIT2	IGF1R	IRF6	ISG20	ITGB4	ITGB6	IVL	LAMA5	LAMC2	LCLAT1	MAP3K1	MAPK3	MBOAT1	MCF2L	MMP15	NDE1	NET1	OAS1
GSK429286A	na	ARHGDIB	ATP1A1	CAPN1	CD9	DAB2IP	DAPP1	EFNA1	FGD4	FOS	INPP1	ITPK1	ITPKC	LAMA5	LAMB3	LAMC2	LDLRAP1	LPAR2	MAP2K3	MYLIP	PAK4	PAK6	PRKCD	PSEN1	PTAFR	RAP2B	RHOD	SYK	TMED10	VPS37B
GSK690693	na	ABCB1	ABL2	ACSL4	ACTN1	AKT3	ANXA2	ARAP3	ARHGEF1	ATF1	AXL	B4GALT6	BDNF	CAP1	CAPN2	CAPZA1	CAST	CAV1	CBL	CD44	CD59	CD63	CERS5	COL4A1	CST3	CTGF	CTSB	DCTD	DLC1	DPYD	EPHA2	ETS1	EXT1	FERMT2	FZD7	GAB2	GAS6	GBE1	GLRX	GNB5	HBEGF	ICAM1	IFNGR2	IL1B	IL6ST	ILK	IRS1	IRS2	ITGB1
GSK690693	na	ABCB1	ABL2	ACSL4	ACTN1	AKT3	ANXA2	ARAP3	ARHGEF1	ATF1	AXL	B4GALT6	BDNF	CAP1	CAPN2	CAPZA1	CAST	CAV1	CBL	CD44	CD59	CD63	CERS5	COL4A1	CST3	CTGF	CTSB	DCTD	DLC1	DPYD	EPHA2	ETS1	EXT1	FERMT2	FZD7	GAB2	GAS6	GBE1	GLRX	GNB5	HBEGF	ICAM1	IFNGR2	IL1B	IL6ST	ILK	IRS1	IRS2	ITGB1
GSK690693_md2	module_2	ANXA1	ATF2	ATM	CDC16	CDH2	CDK17	CDK6	CXCL2	CXCL8	DGUOK	DUSP5	DUSP6	GLS	GNG11	GNG12	GPX1	GRK5	GSTO1	GSTP1	HRH1	MED15	NAMPT	NNMT	NNT	PLK2	PLK3	RGS20	SERPINE2	SMAD3	SMURF2
Gefitinib	na	ABL1	ACAT1	ACLY	AK2	AKT1S1	AKT3	ALDH1B1	ANAPC5	ANGPT1	APPL1	ARHGEF2	ARHGEF6	ATM	ATP6V1B2	BLMH	BMI1	CACNA1C	CAPZB	CCNG1	CCNH	CCT8	CDC34	CDK5	CDON	CHN1	CNOT10	COL1A2	COL3A1	COL6A1	COL6A2	COL6A3	CREB3L2	CSTF3	CUL4B	DCP1B	DCUN1D4	DDR2	DET1	DNAJC8	DOCK11	DYNC1LI1	E2F3	E2F5	EIF4EBP1	EPS15L1	ERCC1	EXOSC10	EZH2
Gemcitabine	na	ALAD	ATP6V0A1	ATP6V0D1	ATP6V0E1	COX5B	COX6C	CYP39A1	CYP4B1	GGPS1	HMGCS2	IDH2	LAMP1	NDUFA2	NDUFAF6	NDUFB7	PMVK	RAB22A	SDHC	TFRC	UQCR10
HG-6-64-1	na	AACS	ADCY6	ALOX15	BLM	BRCC3	CDC6	CDH5	CKMT2	COL9A2	COX6B1	COX6C	CYC1	DCAF8	DGKZ	DHTKD1	DLAT	ENTPD8	ESRRA	F12	F2RL1	FASN	FBP1	FBXO41	FDPS	FLAD1	FOS	GAB1	GAL	GPHN	HMGB1	HPGD	KLK3	LDHD	LIG1	LPAR2	MCCC1	MCEE	MED25	MLX	MMP15	MOGAT3	NAPG	NCOA2	NDUFAB1	NR2F6	NR4A1	NSF	NTSR2
I-BET	na	ACTN1	ANXA1	ANXA2	BID	CAPN2	CAST	CAV1	CXCL8	ICAM1	IL1A	IRF1	MID1	NR3C1	PLD1	PXN	RALB	TRADD
IOX2	na	AHCY	ASNS	DKC1	EIF3D	EIF4A2	GOT1	GPHN	MARS	NOP2	NOP53	PANK1	PCK2	QARS	RPL10	RPL3	RPL4	RPS11	RPS18	RPS4X	RRP12	TWNK
IOX2	na	AHCY	ASNS	DKC1	EIF3D	EIF4A2	GOT1	GPHN	MARS	NOP2	NOP53	PANK1	PCK2	QARS	RPL10	RPL3	RPL4	RPS11	RPS18	RPS4X	RRP12	TWNK
IOX2_md2	module_2	ACTR5	ACVR2B	CAMKMT	EXOSC1	F12	FBXL15	GMDS	HIRA	HMBS	KDM7A	NDUFA10	SSR4	TIMM9
IPA-3	na	ACAA1	ACOX1	AKR1B10	ALDH3A1	ALDH3A2	ALDH9A1	COA6	DDC	DLD	G6PD	GCLM	GPD2	GPX2	GSTA1	GSTK1	HIBCH	IDH1	NDUFA4	TALDO1
JNJ-26854165	na	ADCY6	ADRA2C	AGO4	ARID4A	ASXL2	ATP6V1B1	AXIN2	BMP4	BRPF1	CFTR	CHTOP	CNOT10	CPSF3	CPSF7	DDX3X	DHX8	DNMT3A	E2F6	EIF1AX	EIF4A3	EIF5	EPC1	EZH2	FGF19	FGF9	FOXA3	FOXK2	FZD3	FZD5	GAB1	GTF3C2	HNF4A	IHH	INSM1	INSR	KANSL1	KAT6B	KAT8	LPAR2	LUC7L3	MED13	MED25	MSL2	MSX2	NCOA1	NFIA	NFRKB	NLK
JNKInhibitorVIII	na	AXIN2	BAMBI	BRPF1	CUL3	DET1	EPC2	GTF3A	INSM1	KDM5C	KDM7A	KMT5B	MSL2	NKX2-2	OGT	PBRM1	PHF8	RNF144A	SET	SLC11A2	SOX9	TOP2B	TTC21B	UBE3A	USF2	WNT11
JNKInhibitorVIII	na	AXIN2	BAMBI	BRPF1	CUL3	DET1	EPC2	GTF3A	INSM1	KDM5C	KDM7A	KMT5B	MSL2	NKX2-2	OGT	PBRM1	PHF8	RNF144A	SET	SLC11A2	SOX9	TOP2B	TTC21B	UBE3A	USF2	WNT11
JNKInhibitorVIII_md2	module_2	ACTR1B	BCDIN3D	GBA2	GYG2	INPP5B	KCNH2	RFT1	RPIA	RPS4X	SCAP	STT3B	ULK3	UNC13B	UQCRH	ZNF189	ZNF445
JW-7-24-1	na	CCNT1	FOS	GPHN	INPP1	INPP4B	LIPE	MAP2K3	MMP15	NR4A1	RHOF
KIN001-055	na	AP1M1	AP1S2	ARHGAP17	ARHGEF2	ARHGEF6	ARIH2	BRK1	CALU	CARS	CDC16	CHN1	CHPT1	COL1A2	COL6A2	COL6A3	CREB3L2	DCTN4	DDIT3	DLC1	DPYSL2	DPYSL3	DYNC1LI1	EIF4EBP1	ELMO2	EPS15L1	FMNL3	FYN	GARS	GDI1	GK	GPAM	HARS	IFT172	LAMA1	LARS	LSM10	MAD1L1	MARS	NCKIPSD	P3H1	PDGFRB	PFDN2	PHC2	PKD1	PLCG1	PLXND1	RBM5	RHOA
KIN001-055	na	AP1M1	AP1S2	ARHGAP17	ARHGEF2	ARHGEF6	ARIH2	BRK1	CALU	CARS	CDC16	CHN1	CHPT1	COL1A2	COL6A2	COL6A3	CREB3L2	DCTN4	DDIT3	DLC1	DPYSL2	DPYSL3	DYNC1LI1	EIF4EBP1	ELMO2	EPS15L1	FMNL3	FYN	GARS	GDI1	GK	GPAM	HARS	IFT172	LAMA1	LARS	LSM10	MAD1L1	MARS	NCKIPSD	P3H1	PDGFRB	PFDN2	PHC2	PKD1	PLCG1	PLXND1	RBM5	RHOA
KIN001-055_md2	module_2	ACAT1	APH1B	ATP6V1B2	B4GAT1	BAMBI	CCNH	CD99	DET1	ELK1	GNB3	KAT2B	KCNAB2	LEF1	MAP2K5	MME	NDUFAF2	NDUFAF3	NFIX	PDHB	PDK1	POLR3GL	PREX1	RGS3	RGS4	RNF14	SAP30	SH2B3	ST3GAL2	ST3GAL3	STK4	TTC37
KIN001-102	na	ABL2	ACSL4	ACTN1	ADM	ADORA2B	AK3	AK5	AMPD2	ANXA2	ANXA5	ARAP3	ARHGAP22	ARHGEF1	ARHGEF18	AXL	B4GAT1	BICD1	CALD1	CAP1	CAP2	CAPZA1	CAV1	CD44	CDC14B	CDH13	CDH2	CERS5	COL13A1	COL4A1	COL4A2	COL5A1	COL6A1	COL6A2	COLGALT1	CST3	CTGF	CTSB	CYB5R3	CYTH3	DCTD	DDR2	DLC1	DPYD	DPYSL3	DST	ENTPD4	ERBIN	EXT1
KIN001-102	na	ABL2	ACSL4	ACTN1	ADM	ADORA2B	AK3	AK5	AMPD2	ANXA2	ANXA5	ARAP3	ARHGAP22	ARHGEF1	ARHGEF18	AXL	B4GAT1	BICD1	CALD1	CAP1	CAP2	CAPZA1	CAV1	CD44	CDC14B	CDH13	CDH2	CERS5	COL13A1	COL4A1	COL4A2	COL5A1	COL6A1	COL6A2	COLGALT1	CST3	CTGF	CTSB	CYB5R3	CYTH3	DCTD	DDR2	DLC1	DPYD	DPYSL3	DST	ENTPD4	ERBIN	EXT1
KIN001-102_md2	module_2	ABLIM3	ACTA2	ACTB	ADGRE1	AGPAT4	AKT3	ANXA1	AP1M1	AP1S2	ASXL1	ATP6V1E1	BDNF	BIN1	BMP1	CAVIN1	CBL	CCL2	CCNH	CD68	CDK6	CXCL8	DNAJC6	DOCK1	DOCK7	ECM1	EDNRB	EFEMP2	EPHA2	EPS15	F2R	FGF2	FSCN1	FST	FYN	GNAI2	GRK5	HRH1	HSPG2	ICAM1	KPNB1	LCAT	LPCAT4	LPIN1	LPXN	LY96	MET	MOV10	MSN
KIN001-270	na	ACSS2	AGPAT2	AHR	ALDH3A1	ARHGAP5	CAPN1	CDH1	CLTB	COASY	COMT	DOK4	EFNA1	ESRRA	ETFA	FOS	FURIN	GPAT3	IDH1	IDH3A	IGF1R	INPP1	INPP4B	ITGA2	ITGA6	ITGB4	ITPK1	ITPR3	LAMB3	LPCAT2	MAP2K3	NR4A1	NR4A2	PLPP2	PPARA	PPARG	PRKCD	PSEN1	RETSAT	SEL1L	SP1	SRC	THEM4	TRIB3
LAQ824	na	ARSB	ARSJ	ARSK	B2M	CCL2	CD99	CHPF2	COL10A1	COL1A1	CYLD	DERL2	EBF1	FBN1	GNG12	IL13RA1	IL6ST	INSIG1	ITGA11	LAMB2	MAN2A1	NR3C1	PDIA3	PSMB8	SEC23A	SEC24D	SETD7	SMPD1	SRGN	WNT5A
LAQ824	na	ARSB	ARSJ	ARSK	B2M	CCL2	CD99	CHPF2	COL10A1	COL1A1	CYLD	DERL2	EBF1	FBN1	GNG12	IL13RA1	IL6ST	INSIG1	ITGA11	LAMB2	MAN2A1	NR3C1	PDIA3	PSMB8	SEC23A	SEC24D	SETD7	SMPD1	SRGN	WNT5A
LAQ824_md2	module_2	ADAM12	APH1B	ARHGAP20	ARPC5	CALU	DOCK10	DPYSL2	LY96	NDEL1	NFIX	NNMT	PAPSS2	PPP2R5B	RAB27A	SLC9A6	TPM4
LFM-A13	na	ACTR5	AHCY	ATP1A1	ATP5F1B	ATP6V1C2	BRPF1	CDC25A	CDK8	CHCHD4	CNOT10	CNOT6	COX5A	CTNNB1	DKC1	DOT1L	EAF1	EIF3M	EXOSC8	GNL3	GRPEL2	HIRA	HNRNPR	IMPDH2	IPO5	KHSRP	LYAR	MAPK1	MRPS5	NFRKB	NOC2L	NOP14	NUP50	NUP54	POLR1D	PPP1CC	PPP4R2	PRIM1	PRKRA	PRMT3	PRPF19	PSME4	PTBP1	PUM2	RAF1	RPL14	RPL27	RPL32	RPL37A
LY317615	na	ANK2	AP1M1	AP1S2	ATP6V1B2	B4GAT1	CSNK1E	DVL2	EFEMP2	EXT2	GNB4	JAM3	KCNA2	KIF3C	LAMA1	MAGI2	MAP3K3	MAPK7	MME	MMP14	MYH10	MYO5A	NDEL1	PRKAG1	SEC13	SERPING1	SKP2	SPARC	ST3GAL3	STXBP1	TUBB2A	TUBB2B
LY317615	na	ANK2	AP1M1	AP1S2	ATP6V1B2	B4GAT1	CSNK1E	DVL2	EFEMP2	EXT2	GNB4	JAM3	KCNA2	KIF3C	LAMA1	MAGI2	MAP3K3	MAPK7	MME	MMP14	MYH10	MYO5A	NDEL1	PRKAG1	SEC13	SERPING1	SKP2	SPARC	ST3GAL3	STXBP1	TUBB2A	TUBB2B
LY317615_md2	module_2	CERS4	ELOVL4	ENPP2	IL12A	MYO9B	PEMT	PLCG1	PRKD3	RBSN	SCD5	WASF1	WASF3
MK-2206	na	AKT3	CDK5R1	EED	FYN	GAB2	IRS2	MED12	MED17	PHC2	PLXNA1	PPP3R1	RPS6KA3	RUNX1	SP100	SPRED1	SPRY2	STAT2
MPS-1-IN-1	na	ADAM12	ADAMTS1	AP1M1	ARHGAP29	CALD1	CALU	CAP2	CCL2	CDH2	COL12A1	COL1A2	COL6A2	COL6A3	CTGF	CYLD	DLC1	EFEMP2	EPAS1	EPN1	FBN1	FGF2	FGFR1	FLNA	GLIPR1	GNG11	GNG12	IGFBP5	IL13RA1	IL17RC	IL6	IL6ST	IL7R	ITGA5	ITGB1	LAMB1	LGALS1	LOX	MYBL1	MYH9	MYLK	NNMT	P3H1	POFUT2	PSMB8	PSMD10	RAB32	RHOC	RINT1
Masitinib	na	ARHGEF18	CD14	COL17A1	EGFR	EZR	IL18	IL1A	ITGB4	LAMA3	LAMA5	LAMB3	LAMC2	LYN	NFKBIA	PAK6	RHOF
Midostaurin	na	ABCG1	ACAA1	ACOX1	ACSL1	ACSS1	ACSS2	ADCY6	ARRB1	ASPA	AVP	BRAF	CCL28	COX5B	CPT2	CYC1	DCXR	DGKZ	DHTKD1	DLAT	EDNRB	ESR1	ETFA	FASN	FOLH1	FOS	FOXO4	GAL	GNG7	GPD1L	HADH	HIBCH	LCLAT1	MCCC1	MED25	MMAB	MRPS25	MT-ND1	MT-ND4	NCOA2	NDUFA8	NDUFAB1	NDUFB9	NDUFS3	NFATC2	NR1H3	NR4A1	PDHX	PEX1
MitomycinC	na	AMPH	APH1B	EPN1	FYN	GAB1	KCNB1	LRP1	LRP2	NGF	NRCAM	PLXNA3	RAB22A	RAB5A	RHOBTB1	STAM	THBS3
NPK76-II-72-1	na	ACTN4	BET1	BET1L	CAPN2	CAV1	CD151	CD59	CD63	CD68	COPA	CTSB	DLC1	DUSP10	DYNLRB1	EHD2	EPAS1	EPN1	FLNA	FN1	GBF1	HSPG2	ICAM1	ITGB1	ITGB5	KDELR3	LAMB1	LAMB2	LAMC1	LAMP1	LAMP2	LGALS1	LGALS3BP	LRP1	MET	MITF	MMP14	MVP	MYH9	PRKCE	PTPN1	PXN	RALB	RHOC	RRAS	S100A10	SDC4	SMPD1	SRGAP1
NSC-207895	na	ABCC1	ABCG1	AHR	AKR1B10	ALDH3A1	ATP1B1	CEBPD	CPT1A	CTTN	DECR1	ELOB	EPAS1	ESRRA	ITGA2	KLF4	LRP5	MAOA	ME1	NFKB1	PLPP2	PPARA	PPP3CA	RXRA	SDC1	TALDO1	TCIRG1	TRADD	TSPO	WASL
NU-7441	na	ALMS1	CTCF	DCLRE1A	DDX5	DGCR8	DROSHA	FANCF	FANCL	GATA3	HNRNPM	MAFB	MAML1	MCM2	MED13	NCOA6	NUMA1	PDS5B	POLE3	RAD1	RAD23B	RAD51C	REV1	SMARCA5	SRSF1	TFDP1	TUBGCP3	UBE4A	USP7	UTP14C	WDR5
NVP-BEZ235	na	ACTL6A	ACVR1B	ADCY1	ADRB1	ATP6V1C2	AXIN2	BLM	BMP7	BRAF	BRD1	BRD8	CAMK2B	CDC25A	CDH1	CENPX	CEP72	CFTR	COP1	COX5A	COX6C	CTCF	CYP2D6	DGKZ	DNMT3A	E2F1	E2F2	EGR1	ESRRA	EZH2	FABP1	FANCL	FASN	FOS	FOXO4	GAB1	GAL	GBA2	GHRHR	GPD1L	GPD2	H2AFZ	HES1	HMGB1	HNF4A	IHH	INSR	IRF8	KAT7
NVP-BEZ235	na	ACTL6A	ACVR1B	ADCY1	ADRB1	ATP6V1C2	AXIN2	BLM	BMP7	BRAF	BRD1	BRD8	CAMK2B	CDC25A	CDH1	CENPX	CEP72	CFTR	COP1	COX5A	COX6C	CTCF	CYP2D6	DGKZ	DNMT3A	E2F1	E2F2	EGR1	ESRRA	EZH2	FABP1	FANCL	FASN	FOS	FOXO4	GAB1	GAL	GBA2	GHRHR	GPD1L	GPD2	H2AFZ	HES1	HMGB1	HNF4A	IHH	INSR	IRF8	KAT7
NVP-BEZ235_md2	module_2	BRIX1	DDX55	DKC1	GFM1	IMP3	LSG1	MPHOSPH10	MRPL3	MRPL38	MRPL57	MRPL9	MRRF	NAT10	NVL	RPL10	RRN3	TFB2M	UTP14C
NVP-BHG712	na	ARHGAP10	ARHGAP29	AURKA	BAD	CAMK2G	CDC25C	CDC5L	CDKN3	CEBPD	CHEK2	COL1A2	COL5A1	DLGAP5	DPYD	EGFR	EIF4A3	EXT1	EZR	FBLIM1	FLNB	FOXO3	GOLGA5	IL6	JUN	KIF4A	MAP2K4	MAPK14	MAPK9	MED20	MPP5	NCOA3	NEDD1	NFKBIA	NOTCH3	NRBP1	OCRL	OSMR	PARP2	PPP2R5D	PPP2R5E	PSEN1	PSMA3	PSMB6	PSMD10	PSMD5	RACGAP1	RAD1	RAD9A
Nutlin-3a	na	ARHGAP11A	ARHGDIB	ASF1B	BARD1	BLM	CAMK2G	CCNE2	CCT5	CDC25C	CDC7	CDCA5	CDCA8	CENPA	CENPQ	CEP72	CEP76	CHD8	CHEK2	CHTF18	CNOT1	CNOT8	CNTRL	E2F1	E2F8	ECT2	FAAP24	FANCC	FANCG	FANCI	FANCM	FGFR1OP	GEMIN2	GLE1	HAUS2	HES1	HIST1H2BD	HIST1H2BJ	HSPA1A	HSPA1B	JAG2	KDM2A	KIF23	KIF24	KIF2C	KIF4A	KMT5B	KNL1	KNTC1
Nutlin-3a	na	ARHGAP11A	ARHGDIB	ASF1B	BARD1	BLM	CAMK2G	CCNE2	CCT5	CDC25C	CDC7	CDCA5	CDCA8	CENPA	CENPQ	CEP72	CEP76	CHD8	CHEK2	CHTF18	CNOT1	CNOT8	CNTRL	E2F1	E2F8	ECT2	FAAP24	FANCC	FANCG	FANCI	FANCM	FGFR1OP	GEMIN2	GLE1	HAUS2	HES1	HIST1H2BD	HIST1H2BJ	HSPA1A	HSPA1B	JAG2	KDM2A	KIF23	KIF24	KIF2C	KIF4A	KMT5B	KNL1	KNTC1
Nutlin-3a_md2	module_2	ACAT2	ACTL6A	AHR	ARHGEF19	ATG5	AURKA	BCL2L11	BID	CAPN1	CCDC88C	CDC20	CDH1	CDK1	CDKN2B	CDKN2D	CEBPB	CPSF7	CPT1A	DEK	DHCR7	DROSHA	DTX2	DVL1	EGFR	EIF4A3	ELP1	ETS2	EZR	FOXO3	HDAC1	HMGCS1	ID1	IRF6	ISG15	ITCH	JUNB	KLC3	KLF4	KLF5	LRP5	MAP2K1	MAP3K5	MAPK14	ME1	MED10	MED30	MRGBP	MRPL11
OSI-027	na	ABCC1	ABCG2	AHR	ARPC5	CASP8	GCLM	LRP8	MAP2K3	PPARA	RAB10	RILP	ROCK2	TALDO1	TKT	YWHAG
OSU-03012	na	ALDH9A1	ASL	ATP5PF	ATP6AP2	CYB5A	CYB5R1	FAH	LY96	NDUFB2	NDUFB3	SDHC	SRD5A3	TRIM9
OSU-03012	na	ALDH9A1	ASL	ATP5PF	ATP6AP2	CYB5A	CYB5R1	FAH	LY96	NDUFB2	NDUFB3	SDHC	SRD5A3	TRIM9
OSU-03012_md2	module_2	AP1S1	ARL6IP5	ARPC1A	ARPC5	ASH2L	ATP1A4	EDNRB	FMOD	GNA14	GNB2	LMNA	NME3	NSF	PAG1	PGK1	ST3GAL4	UGP2	WSB2
ObatoclaxMesylate	na	ABCA7	AKR1B10	ASPH	ATP1A4	ATP1B1	BIN2	BLVRB	CAMK2G	CDS1	CLOCK	CYP39A1	CYP4F3	EPHX1	GSTA1	GSTA2	HMGCS2	KCNV1	MAPK3	MGST1	MGST3	MYL6	NAT2	PHKB	PI4K2B	PLA2G10	PLA2G12A	PLCE1	PMVK	PPIG	RDH10	ROCK2	SCNN1B	SP3	SRD5A3	TRPM4	UGP2
Olaparib_rescreen_	na	ACSL1	AGPAT2	AKT1	BCAP31	CDH1	CHCHD3	CPT1A	CYP2D6	DGKQ	DNAJC5	E2F1	ESR2	ESRRA	GK	GMIP	GRB2	HNF4A	IDH3A	KALRN	LCLAT1	MDH2	MOGAT3	MPC1	NR2C2AP	PDK2	PEX1	PHB	PRKAR1B	SLC27A4	TOMM40	UGT8	WASL	YWHAG
PD-0325901	na	ALMS1	ARL3	ASF1A	BANF1	BARD1	BAZ1B	CBX5	CCNE2	CCNF	CCP110	CCT5	CDC25C	CDC7	CDCA5	CDCA8	CENPA	CENPE	CENPF	CEP192	CEP70	CEP78	CEP89	CHEK1	CNOT7	DBF4	DMAP1	DNA2	DNMT1	DNMT3B	E2F2	EHMT2	EPC1	FANCC	FANCE	FANCG	FBXO5	FGFR1OP	GEMIN2	GINS1	GMNN	H2AFX	ING2	JADE1	KAT6B	KAT7	KAT8	KIF11	KIF15
PD-0325901	na	ALMS1	ARL3	ASF1A	BANF1	BARD1	BAZ1B	CBX5	CCNE2	CCNF	CCP110	CCT5	CDC25C	CDC7	CDCA5	CDCA8	CENPA	CENPE	CENPF	CEP192	CEP70	CEP78	CEP89	CHEK1	CNOT7	DBF4	DMAP1	DNA2	DNMT1	DNMT3B	E2F2	EHMT2	EPC1	FANCC	FANCE	FANCG	FBXO5	FGFR1OP	GEMIN2	GINS1	GMNN	H2AFX	ING2	JADE1	KAT6B	KAT7	KAT8	KIF11	KIF15
PD-0325901_md2	module_2	AGO3	AR	ARHGAP10	ATP2A3	BIRC5	CCAR1	CCNA2	CD8A	CDC20	CDC23	CDC5L	CDK1	CKAP5	CLU	CPSF7	DDX23	DEK	DROSHA	ELAVL1	FOXG1	FOXM1	FOXO3	FZD2	GATA3	GPC2	GUCY1A1	GUCY1B1	H2AFV	HDAC2	HNRNPA0	ID1	ILF2	LSM2	LSM4	LSM6	MAD2L1	MAPK8	MAPK9	MYBL2	NOTCH3	NSD2	PLK1	POLR2G	POLR2I	RAC3	ROR2	SMAD1	SNRNP200
PD-0332991	na	AKAP9	ARF5	ARID4B	BARD1	BLM	BUB1	CABIN1	CCNE1	CCNE2	CCNF	CDC25A	CDC25C	CDC45	CDC7	CDCA5	CDCA8	CDT1	CENPA	CENPF	CENPL	CENPM	CENPP	CEP131	CEP192	CEP72	CEP76	CHD8	CHTF18	CLSPN	DBF4	DHX9	DNA2	DNMT1	DNMT3A	DSCC1	DTX1	E2F2	E2F3	EXO1	EZH2	FANCC	FANCD2	FANCI	FANCL	FANCM	FGFR4	FUS	GEMIN7
PD-0332991	na	AKAP9	ARF5	ARID4B	BARD1	BLM	BUB1	CABIN1	CCNE1	CCNE2	CCNF	CDC25A	CDC25C	CDC45	CDC7	CDCA5	CDCA8	CDT1	CENPA	CENPF	CENPL	CENPM	CENPP	CEP131	CEP192	CEP72	CEP76	CHD8	CHTF18	CLSPN	DBF4	DHX9	DNA2	DNMT1	DNMT3A	DSCC1	DTX1	E2F2	E2F3	EXO1	EZH2	FANCC	FANCD2	FANCI	FANCL	FANCM	FGFR4	FUS	GEMIN7
PD-0332991_md2	module_2	AARS2	ACAT2	AKT1	ARID3A	ARRB2	ATP5PF	ATP6V0B	BCL2L11	BMP7	BRAF	CAMK2B	CCT3	CDC6	CDH1	CDK1	CDK2	COX6B1	COX6C	CSPG5	DEPDC1B	DHCR7	DLD	DNAJC11	DROSHA	DTL	DUSP2	E2F1	E2F8	ECT2	ETFA	FASN	FDPS	FH	FZD3	FZD9	GAB1	GLO1	GNAO1	GPC2	GPI	GSK3A	GTSE1	H2AFV	H2AFZ	HDAC2	HMGCS1	HSD17B10	HSPA14
PFI-1	na	BARD1	BORA	CDC25C	CENPL	DBF4	DCLRE1C	DERL3	DNA2	E2F1	E2F2	EPC1	EZH2	FGFR1OP	HAT1	MAPK9	MSX2	NEK2	OIP5	PARP2	PDS5A	RFC2	SAE1	SFI1	UBE2K	UBE2T
PHA-793887	na	ABCB1	ACTB	ADAMTS1	AP1M1	AP1S2	ARSB	ATP6AP2	ATP6V1F	BLVRA	CALU	CAP2	CBR3	CD63	CDH2	CDK5	CEP250	CHPF2	CHSY3	CTGF	CYB5R3	DLC1	DUSP3	DYNLRB1	ECM1	EEA1	EFEMP2	EHD2	ELMO2	FLNA	GFRA1	IFT52	ILK	KDELR3	LRP1	MITF	MYLK	OSTM1	PAPSS2	PSMA7	PTPN1	RHOBTB1	SDC2	SLC26A2	SPARC	STAM	TIMP2	TNS3	TUBA1B
PI-103	na	ABCC2	ABCC6	AHR	AKR1B10	AKR1C2	ALDH1A1	ALDH3A2	AQP11	ARPC5	B4GALT5	CASP8	CFTR	CHP1	CYP2S1	CYP3A5	FABP1	GLYCTK	HNF4A	HSD17B2	ITGB4	MAOA	MAOB	MAP2K3	MUC17	MYL12B	NAT2	NR1H3	PDLIM5	PPARA	PPARG	PPFIA1	PROC	PYCARD	RILP	ROCK2	S100A10	SLC22A5	SLC39A5	SP1	SPTBN1	TCIRG1	TRPM7
PLX4720	na	ACTL6A	ACVR1B	AHCTF1	ALMS1	ANAPC16	APLP2	ARHGAP10	ARHGAP11A	ARHGAP29	ARID4A	ARID4B	ASF1A	BARD1	BRCC3	BRD8	CASP6	CCT5	CDC25C	CDC7	CDCA5	CDCA8	CENPC	CENPE	CEP135	CEP192	CEP57	CEP70	CEP76	CHEK1	CHTF18	CTCF	DLGAP5	DNA2	ECT2	ELP4	EPC1	FANCC	FANCE	FANCG	FGFR1OP	GATA2	GEMIN2	GEN1	GOPC	H2AFX	HMGB2	HMGCS1	HMMR
PLX4720	na	ACTL6A	ACVR1B	AHCTF1	ALMS1	ANAPC16	APLP2	ARHGAP10	ARHGAP11A	ARHGAP29	ARID4A	ARID4B	ASF1A	BARD1	BRCC3	BRD8	CASP6	CCT5	CDC25C	CDC7	CDCA5	CDCA8	CENPC	CENPE	CEP135	CEP192	CEP57	CEP70	CEP76	CHEK1	CHTF18	CTCF	DLGAP5	DNA2	ECT2	ELP4	EPC1	FANCC	FANCE	FANCG	FGFR1OP	GATA2	GEMIN2	GEN1	GOPC	H2AFX	HMGB2	HMGCS1	HMMR
PLX4720_md2	module_2	ABCC1	ABRAXAS2	ATAD2	BAD	BUB3	CAMK2G	CCAR1	CCNA2	CCNC	CDC20	CDC40	CDC5L	CDK1	CDK9	CITED2	CKAP5	CNOT1	CNOT6	CNOT8	CPSF7	CPT1A	CWC22	DLG1	EGFR	EHMT1	EIF4A3	FBXO5	FLNB	FOXO3	GCLM	GPC1	H2AFV	HDAC2	HECTD1	HIST1H2BD	HNRNPD	ILF2	IP6K2	IRF3	IRS1	JMJD1C	JUN	KDM2A	KEAP1	KTN1	LAMA5	MAGOH	MAML1
PLX4720_rescreen_	na	ABCA7	ABI1	ABRAXAS2	ACTL6A	ACVR1B	AHCTF1	AKAP13	ALMS1	ALYREF	ANAPC16	APLP2	ARHGAP10	ARHGAP11A	ARHGAP29	ARHGAP44	ARID4A	ARID4B	ASF1A	B3GNT4	B4GALT1	BARD1	BORA	BRCC3	BRD8	BTG2	CAMK2G	CASK	CASP6	CCAR1	CCNC	CDC25C	CDC40	CDC5L	CDCA5	CDCA8	CDK1	CENPE	CEP192	CEP57	CEP70	CEP72	CEP76	CNOT1	CNOT2	CNOT6	CNOT8	COL17A1	CPSF7
PLX4720_rescreen_	na	ABCA7	ABI1	ABRAXAS2	ACTL6A	ACVR1B	AHCTF1	AKAP13	ALMS1	ALYREF	ANAPC16	APLP2	ARHGAP10	ARHGAP11A	ARHGAP29	ARHGAP44	ARID4A	ARID4B	ASF1A	B3GNT4	B4GALT1	BARD1	BORA	BRCC3	BRD8	BTG2	CAMK2G	CASK	CASP6	CCAR1	CCNC	CDC25C	CDC40	CDC5L	CDCA5	CDCA8	CDK1	CENPE	CEP192	CEP57	CEP70	CEP72	CEP76	CNOT1	CNOT2	CNOT6	CNOT8	COL17A1	CPSF7
PLX4720_rescreen__md2	module_2	ALCAM	ANAPC10	ANAPC7	ATAD2	BAD	BUB3	CASP7	CATSPER3	CATSPERG	CCNA2	CDK9	CDT1	CHEK1	CITED2	CKAP5	CPT1A	DUSP1	EBAG9	EGFR	EGR1	EIF4A3	FBXO5	FOXL2	FOXO3	H2AFV	H2AFX	HDAC2	HIST1H1E	HIST1H2BD	IL18	IL18BP	INPP5A	IRF1	JUN	JUNB	KAT6B	KCNMB3	KLF4	KLF5	KRAS	LCN2	LIN54	MAGOH	MAP3K5	MAPK13	MAPK14	MAPK8	MAPK9
Pazopanib	na	BID	CAB39	CAPN1	CASP10	CAST	CD9	CDH1	CLDN1	COL17A1	CSTA	CTNND1	CTSH	CTTN	DAPP1	DSC3	DSG2	DSG3	EFNA1	EFNB2	EPHA1	EZR	IGF1R	IRS2	ITGA2	ITGA6	ITGB4	ITGB6	ITPR3	LAMA3	LAMA5	LAMB3	LAMC2	LYN	MAP3K5	MET	NECTIN1	PAK1	PAK6	PMAIP1	PRKCD	PTPN6	PXN	STK24	STK26	SYK	TGFA	TNFRSF10A
Phenformin	na	ABLIM3	AK5	APBB1IP	APOL1	ARHGAP29	BAD	BDNF	BIN1	BNIP3L	CAV1	CAVIN1	CCNA1	CCND1	CD40	CDH2	CITED2	CLINT1	COL4A1	COL4A2	DLC1	DUSP1	DUSP3	EGFR	EHD1	EHD2	EPAS1	ETS1	EXT1	FAS	FN1	GFRA1	GLRX	GLS	GNA12	GNG12	HDAC7	HLA-B	IFITM3	IGFBP3	IL15	IL6ST	IL7R	ITGA3	ITGB1	ITSN1	JAK1	LAMB1	LAMC1
QL-X-138	na	ABCB1	ABCC1	ABCC2	ABCG2	ACSS1	AHR	ALDH3A1	G6PD	GCLC	GSTO1	GSTP1	NIP7	NOB1	PGD	POLR1D	RPIA	TALDO1	TKT	UGDH	XYLB
QL-X-138	na	ABCB1	ABCC1	ABCC2	ABCG2	ACSS1	AHR	ALDH3A1	G6PD	GCLC	GSTO1	GSTP1	NIP7	NOB1	PGD	POLR1D	RPIA	TALDO1	TKT	UGDH	XYLB
QL-X-138_md2	module_2	AGPS	ARPC1B	ATF1	CASP8	CTTN	GPAT3	HSPA2	IL22RA1	INPP1	LPAR5	LPCAT2	NUDT15	PPARA	RHOF	SH3D19	SLC7A11	SPTBN1	STAT6	TNFRSF14	TPP2	VAMP3	YWHAG
QL-XI-92	na	ANK3	APRT	FRAT1	FZD5	GPD1L	MTIF2	NOB1	PGM2	POLR1D	PPFIA1	RPIA	RPL22	RPL4	TUFM	VAC14	VPS35	YEATS4
RDEA119	na	AHCTF1	ALMS1	ANAPC7	ARHGAP10	ARHGAP11A	ARHGAP44	ARID4B	ARL3	ASF1A	ATAD5	BANF1	BARD1	BAZ1B	BIRC5	BUB1	CACNA2D2	CBX5	CCNF	CCP110	CCT5	CDC23	CDC25C	CDC7	CDCA5	CDCA8	CENPA	CENPC	CENPE	CENPF	CENPI	CENPL	CENPM	CENPO	CENPQ	CEP135	CEP192	CEP70	CEP76	CEP78	CEP89	CHD3	CHTF18	CLSPN	CNOT7	DBF4	DLGAP5	DMAP1	DNA2
RDEA119	na	AHCTF1	ALMS1	ANAPC7	ARHGAP10	ARHGAP11A	ARHGAP44	ARID4B	ARL3	ASF1A	ATAD5	BANF1	BARD1	BAZ1B	BIRC5	BUB1	CACNA2D2	CBX5	CCNF	CCP110	CCT5	CDC23	CDC25C	CDC7	CDCA5	CDCA8	CENPA	CENPC	CENPE	CENPF	CENPI	CENPL	CENPM	CENPO	CENPQ	CEP135	CEP192	CEP70	CEP76	CEP78	CEP89	CHD3	CHTF18	CLSPN	CNOT7	DBF4	DLGAP5	DMAP1	DNA2
RDEA119_md2	module_2	AGO3	ALKBH5	ATAD2	AURKA	CCAR1	CCNA2	CCNB1	CCNC	CCNE1	CCNE2	CDC20	CDC5L	CDK1	CDK19	CDKN2C	CDKN3	CDT1	CHEK1	CHEK2	CKAP5	CLU	CPSF7	DDX23	DROSHA	ELAVL1	ENAH	ESPL1	EVL	EZH2	FOXM1	GATA3	GUCY1A1	GUCY1B1	H2AFV	H2AFX	HDAC2	HNRNPA0	HNRNPR	ILF2	LIN9	LSM2	LSM4	MAD2L1	MASTL	MCM2	MCM3	MED23	MED30
RDEA119_rescreen_	na	ADPRHL2	AHCTF1	ALMS1	ANAPC10	ANAPC7	ARHGAP10	ARHGAP11A	ARHGAP29	ARHGAP44	ARID2	ARID4B	ARL3	ASF1A	BANF1	BARD1	BIRC5	BORA	BRD8	CACNA2D2	CASP6	CBX5	CCNA2	CCNB1	CCNE1	CCNE2	CCNF	CCP110	CDC23	CDC25C	CDC5L	CDC7	CDCA5	CDCA8	CDKN1B	CENPA	CENPC	CENPE	CENPF	CENPJ	CENPL	CENPQ	CEP192	CEP70	CEP76	CEP78	CEP89	CHD3	CHTF18
RDEA119_rescreen_	na	ADPRHL2	AHCTF1	ALMS1	ANAPC10	ANAPC7	ARHGAP10	ARHGAP11A	ARHGAP29	ARHGAP44	ARID2	ARID4B	ARL3	ASF1A	BANF1	BARD1	BIRC5	BORA	BRD8	CACNA2D2	CASP6	CBX5	CCNA2	CCNB1	CCNE1	CCNE2	CCNF	CCP110	CDC23	CDC25C	CDC5L	CDC7	CDCA5	CDCA8	CDKN1B	CENPA	CENPC	CENPE	CENPF	CENPJ	CENPL	CENPQ	CEP192	CEP70	CEP76	CEP78	CEP89	CHD3	CHTF18
RDEA119_rescreen__md2	module_2	AGO3	ALKBH5	ALYREF	AR	BRAF	BUB1	CALML5	CAMK2B	CAMK2G	CCAR1	CCNC	CCT5	CDC20	CDK1	CDKN2C	CDT1	CHEK1	CHEK2	CKAP5	CLU	CPSF7	DAXX	DDX23	DEK	DROSHA	EIF4A3	ELAVL1	ENAH	ERCC6L	EVL	FANCM	FLNB	FOXG1	FOXM1	GATA2	GATA3	H2AFV	H2AFX	HIPK1	HNRNPD	HNRNPR	HPRT1	HSPA14	ID1	MAD2L1	MAGOH	MAML1	MED20
Ruxolitinib	na	AKR1A1	EIF3D	EXOSC5	KDM2B	KLHL25	NUDC	POLD1	PPIE	SFI1	SHMT2	SMARCB1	SNRPD3
SB-505124	na	AHR	ASPH	CEBPD	DNMT1	ID1	ITGA2	LDLR	MGST1	MIF	MPHOSPH10	NMU	NUDT21	PANK3	PGM2	POLE3	PPP3CA	PRPF3	RPL36AL	TXN
SB-715992	na	ACBD3	ACKR1	ACTB	ASXL1	AURKA	CD63	CEP250	COPA	DLC1	DUSP3	DYNLRB1	EEA1	EPN1	MCFD2	MOCS3	NECTIN3	NELFCD	PAPSS2	POLR2L	PTPN1	RAB5C	RARA	SPTBN1	STAM	VEGFB	YWHAB
SB-715992	na	ACBD3	ACKR1	ACTB	ASXL1	AURKA	CD63	CEP250	COPA	DLC1	DUSP3	DYNLRB1	EEA1	EPN1	MCFD2	MOCS3	NECTIN3	NELFCD	PAPSS2	POLR2L	PTPN1	RAB5C	RARA	SPTBN1	STAM	VEGFB	YWHAB
SB-715992_md2	module_2	ABCC6	ABHD12	ACOT8	AMDHD2	ANKRD1	ATOX1	ATP5F1E	ATP6AP2	B4GALT5	CHSY3	COMMD7	CST3	DGAT2L6	EDEM2	G6PC3	GBA	NDUFAF3	PHYH	PIGU	SERINC3	TIMP2	TRPC4AP	UGGT1
SB216763	na	ATF6	CCNT1	CDK8	CPSF2	DLST	DNAJC11	FBXW7	GCH1	GSK3B	GUCY2F	HSPA14	IDH1	MRPL46	NDUFB9	NDUFS1	NDUFS3	NR2C2	NUP160	NUP210	PAPOLA	PCK2	POLR2G	POLR3K	SNW1	TIMM44	TMED10	TRMT10C	USP39
SB216763	na	ATF6	CCNT1	CDK8	CPSF2	DLST	DNAJC11	FBXW7	GCH1	GSK3B	GUCY2F	HSPA14	IDH1	MRPL46	NDUFB9	NDUFS1	NDUFS3	NR2C2	NUP160	NUP210	PAPOLA	PCK2	POLR2G	POLR3K	SNW1	TIMM44	TMED10	TRMT10C	USP39
SB216763_md2	module_2	ANP32A	BANP	BRAF	COQ6	DTNBP1	EIF2B2	EIF2B5	LAGE3	MARS	PDSS1	PIK3R4	PPP2R5C	PPP6R3	RAB6A	RABGGTA	SENP2	SLC25A4	SLC25A5	SOCS4	SPRTN	TAF8	TRAPPC6B	USP7
SB52334	na	ACD	ACTN1	ALCAM	AXL	BUB3	CAMK2G	CDK6	CDK7	CLIP1	CNEP1R1	COL17A1	CSNK2A2	CSTA	DDX58	DLG1	DSG2	DSG3	E2F4	EGFR	EPAS1	EXT1	EZR	FBLIM1	FLNB	GAS6	IFI27	IFI30	IFIT2	IFITM3	IL1A	IL1B	IRF1	ISG15	ITGA2	JUNB	LAMA3	LAMB3	LAMC2	MPP5	NEDD4	NFKBIA	NIPBL	OAS3	OASL	OPTN	PLAU	PPP1R12A	PRDX1
SB52334	na	ACD	ACTN1	ALCAM	AXL	BUB3	CAMK2G	CDK6	CDK7	CLIP1	CNEP1R1	COL17A1	CSNK2A2	CSTA	DDX58	DLG1	DSG2	DSG3	E2F4	EGFR	EPAS1	EXT1	EZR	FBLIM1	FLNB	GAS6	IFI27	IFI30	IFIT2	IFITM3	IL1A	IL1B	IRF1	ISG15	ITGA2	JUNB	LAMA3	LAMB3	LAMC2	MPP5	NEDD4	NFKBIA	NIPBL	OAS3	OASL	OPTN	PLAU	PPP1R12A	PRDX1
SB52334_md2	module_2	ARHGAP29	ARHGEF18	EHD2	EPHB2	NUMB	PRKCI	RFFL	TNFRSF10A	TNFRSF25	TRADD	TRIP10
SB590885	na	ABRAXAS2	ALMS1	APLP2	ARHGAP10	ARHGAP11A	ARHGAP29	ARL3	ASF1A	BARD1	BRCC3	BUB3	CAMK2G	CCAR1	CCNA2	CCT5	CDC25C	CDC5L	CDCA5	CDCA8	CENPC	CENPE	CENPF	CEP70	CEP76	CHEK1	CITED2	CKAP5	COL5A1	CPSF7	CWC22	CWC27	DLG1	DLGAP5	DYNLT1	ECT2	EFEMP1	FANCG	FBLIM1	FBLN1	FBXO5	FLNB	FZD2	GEMIN2	GOPC	GPC1	H2AFX	HDAC7	HMGB2
SB590885	na	ABRAXAS2	ALMS1	APLP2	ARHGAP10	ARHGAP11A	ARHGAP29	ARL3	ASF1A	BARD1	BRCC3	BUB3	CAMK2G	CCAR1	CCNA2	CCT5	CDC25C	CDC5L	CDCA5	CDCA8	CENPC	CENPE	CENPF	CEP70	CEP76	CHEK1	CITED2	CKAP5	COL5A1	CPSF7	CWC22	CWC27	DLG1	DLGAP5	DYNLT1	ECT2	EFEMP1	FANCG	FBLIM1	FBLN1	FBXO5	FLNB	FZD2	GEMIN2	GOPC	GPC1	H2AFX	HDAC7	HMGB2
SB590885_md2	module_2	ANXA1	ARID4B	ATG5	BAD	BDNF	CASP6	CD2AP	CEP89	DDX58	EGFR	EHMT1	ELP4	EPC1	GNAI3	H2AFV	IL18	ING2	IRF1	JADE1	JUN	KDM2A	KIF5B	KLF5	MAP2K1	MAPK8	MBD2	MED23	MED30	NFKBIA	NFYB	PLAU	PLCB3	PLCE1	RBM17	RPGRIP1L	SCLT1	SIRT1	SLC38A1	SLC38A2	TBL1X	TEAD3	TNFRSF10A	TNFSF10	UBA6	UBE2A
SGC0946	na	BRD2	CASC3	GTF3C5	MSH2	NELFE	NUP153	RIOK1	RPS18	SNW1	UBA2	YY1	ZNF830	ZNRD1
SN-38	na	ACO2	ACSS1	ALDH1A1	BCO1	COX5A	COX5B	COX6B1	COX6C	CYP2S1	DLD	EPHX1	ETFA	FBP1	GSR	GSTA1	GSTA2	GSTA3	IDH1	IDH2	LDHD	MDH2	MPC1	MT-ND1	NDUFA2	NDUFAB1	NDUFB10	NDUFB11	PDK2	PFKFB2	RBP2	SDHC	UQCR10	UQCRQ
SN-38	na	ACO2	ACSS1	ALDH1A1	BCO1	COX5A	COX5B	COX6B1	COX6C	CYP2S1	DLD	EPHX1	ETFA	FBP1	GSR	GSTA1	GSTA2	GSTA3	IDH1	IDH2	LDHD	MDH2	MPC1	MT-ND1	NDUFA2	NDUFAB1	NDUFB10	NDUFB11	PDK2	PFKFB2	RBP2	SDHC	UQCR10	UQCRQ
SN-38_md2	module_2	ACSL1	ADI1	AGPAT2	ALAD	ALAS1	ALOX15	APH1A	ARF1	ARHGAP45	ARRB1	ARSD	ATP6V0A1	ATP6V0B	ATP6V0D1	ATP6V1C2	BAMBI	BMP4	BMP7	C4BPB	CCNE1	CDH1	CDIPT	CPT1A	CYP1A1	CYP2D6	DGKQ	ENOPH1	EPHA1	ERBB2	ERBB3	FABP1	FGD4	FGFR4	FOXA3	FOXO4	FZD5	GAB1	GGA2	GHR	GK	GMIP	GNRH2	GPD1L	GRB7	HGD	HIST1H1B	HMGCS2	HNF4G
Shikonin	na	AKR1B10	ALDH3A1	ALDH3A2	ALG1	BLVRB	CYP4F3	DDC	EPHX1	GCLC	GCLM	GPD2	GSTA1	GSTA2	PLA2G10	PLA2G12A	SRD5A3	TALDO1	TXNRD1	UGDH
TAK-715	na	ABL2	ACTG2	ACTN1	ADAM12	ADAMTS2	ANXA5	AP1M1	AP1S2	AP2S1	ARHGEF1	CALD1	CALR	CAP2	CAPZB	CD44	CD63	CDH2	CHN1	COL1A1	COL1A2	COL5A1	COL6A1	COL6A2	COL6A3	CTGF	DDR2	DLC1	DOCK10	ECM1	EFEMP2	EHD2	ELMO2	FBN1	FLNA	FN1	GLRX	GNA12	GNAI2	GNB4	GNG11	GNG12	HAS2	ILK	ITGA4	ITGA5	ITGB1	ITGB5	KDELR3
TAK-715	na	ABL2	ACTG2	ACTN1	ADAM12	ADAMTS2	ANXA5	AP1M1	AP1S2	AP2S1	ARHGEF1	CALD1	CALR	CAP2	CAPZB	CD44	CD63	CDH2	CHN1	COL1A1	COL1A2	COL5A1	COL6A1	COL6A2	COL6A3	CTGF	DDR2	DLC1	DOCK10	ECM1	EFEMP2	EHD2	ELMO2	FBN1	FLNA	FN1	GLRX	GNA12	GNAI2	GNB4	GNG11	GNG12	HAS2	ILK	ITGA4	ITGA5	ITGB1	ITGB5	KDELR3
TAK-715_md2	module_2	ARF4	ARSB	AXL	B4GALT5	B4GAT1	C3AR1	CD99	CHST11	CHSY1	CHSY3	CXCL12	DPYSL2	ETS1	F2R	FGF2	FYN	GALNT2	GFPT2	IL6ST	IL7R	KAT2B	MME	PLOD1	PLOD2	PLOD3	PMM1	PRKD1	RGS4	SERPINE2	SHC1	SOCS5	ST3GAL2	ST3GAL6	TGFB1	THY1	UAP1
TG101348	na	ATP6V0D2	CCNT1	CDK2	CPB2	CPN1	DCT	EDEM1	EDNRB	ERBB3	GLUD2	GM2A	INPP4B	INPP5F	LCP2	LIPE	MAN2A2	NDUFAF3	NR4A1	PRKAG1	RAE1	SLC11A2	SLC45A2	SLC5A6	TRPM1	TUBB4A	TYR	UQCRH	XYLB
THZ-2-102-1	na	ABCG2	ADM	ANXA2	BCAR1	BMP4	CAPN2	CAST	CAV1	CAV2	CSF2RA	DLC1	EPAS1	FLNB	GLRX	ITGA3	ITGB1	LAMA3	LAMB1	MET	PTPN1	PXN	RAB21	RALB	RHOF	S100A10	SDC4	SLC2A1	SMAD3	SRGAP1	TFPI	TGFBI	TNS3	TRADD
THZ-2-102-1	na	ABCG2	ADM	ANXA2	BCAR1	BMP4	CAPN2	CAST	CAV1	CAV2	CSF2RA	DLC1	EPAS1	FLNB	GLRX	ITGA3	ITGB1	LAMA3	LAMB1	MET	PTPN1	PXN	RAB21	RALB	RHOF	S100A10	SDC4	SLC2A1	SMAD3	SRGAP1	TFPI	TGFBI	TNS3	TRADD
THZ-2-102-1_md2	module_2	AKR1B10	ALDH3A1	AQP11	BLVRB	CYB5A	CYP4F3	DGAT2L6	EPHX1	GALE	GPAT3	HSD3B1	HSD3B7	LCAT	PAPSS2	PLA2G16	UGDH	UXS1
THZ-2-49	na	AKAP13	ARHGAP5	ATP2A2	BMP2	BTRC	CDK9	CLDN1	COL17A1	CSTA	CTNND1	CTSV	DGKA	DLL1	DSC3	DSG3	EGFR	ETS2	FABP4	FOS	FZD6	GNA15	GPC1	IL1A	IL1B	IRF6	ITGA6	JAG2	JUNB	KRT14	KRT5	KRT6A	LAMB3	LAMC2	LYN	MAX	MED6	MMP13	NCOA3	NCOR1	NECTIN1	NFKBIA	PKP1	PLCB3	PPM1A	PPP1R13L	PSEN1	PTAFR	PTK2B
TL-1-85	na	ATF3	CAMK2G	CDH1	CDH24	CEBPD	COL17A1	CSTA	CTNND1	DSG2	DSG3	EGFR	EGR1	FLNB	FOS	FOSB	FOXO3	GNA15	HERC6	IFI30	IL18	IL1A	IL1B	IRF1	IRF6	ISG15	ITGA2	ITGA6	ITGB4	ITGB6	ITPR3	JUN	JUNB	KRT14	LAMA3	LAMA5	LAMB3	LAMC2	LCN2	LYN	MAPK9	NECTIN1	OAS3	OASL	PLCB3	PPARG	PPP3CA	PSEN1	PTAFR
TL-1-85	na	ATF3	CAMK2G	CDH1	CDH24	CEBPD	COL17A1	CSTA	CTNND1	DSG2	DSG3	EGFR	EGR1	FLNB	FOS	FOSB	FOXO3	GNA15	HERC6	IFI30	IL18	IL1A	IL1B	IRF1	IRF6	ISG15	ITGA2	ITGA6	ITGB4	ITGB6	ITPR3	JUN	JUNB	KRT14	LAMA3	LAMA5	LAMB3	LAMC2	LCN2	LYN	MAPK9	NECTIN1	OAS3	OASL	PLCB3	PPARG	PPP3CA	PSEN1	PTAFR
TL-1-85_md2	module_2	CAB39	CAPN1	CAST	CXCL2	DOCK9	DTX2	EPAS1	HSPA1B	IFNLR1	IL4R	JAG2	MAOA	MLKL	NCKAP1	NFKBIA	PLEKHA1	PLPP2	PNP	PSME1	REL	SGPP1	STK26	STK3	UBC	XDH
TL-2-105	na	ANXA1	ANXA2	AXL	CAV1	CEBPD	CLDN1	COL4A1	COL4A2	CXCL8	IL1A	IL1B	LAMB1	LAMC1	LGALS3	MMP14	NR3C1	S100A11	SMARCA2	TRADD
TPCA-1	na	ACBD3	AKT1	CALU	CAP2	CBR3	COG5	COL1A2	CYB5R1	CYB5R3	DYNC1LI2	ITGB5	P4HA2	PMM1	POFUT2	RAB22A	RINT1	ZMAT5
TW37	na	ABCG1	ACSL5	ALDH3A1	ANO1	APH1A	APLP2	ARF1	ARFGAP2	ARHGAP45	ARHGEF7	ARSD	ATP13A2	BCL2L1	BMP4	CAB39	CALB1	CAPN1	CCRL2	CDH1	CFTR	CLCN2	CLOCK	CLTB	COASY	COL17A1	COL9A2	CPT1A	CRABP2	CTNND1	CYP2D6	CYP2S1	CYP3A5	DERL3	EFNB1	EFNB2	EPHA2	ERBB2	ESRRA	EXOC1	EZR	FABP1	FANCF	FTH1	GATA3	GATA6	GDA	GOSR1	HMGCS2
TW37	na	ABCG1	ACSL5	ALDH3A1	ANO1	APH1A	APLP2	ARF1	ARFGAP2	ARHGAP45	ARHGEF7	ARSD	ATP13A2	BCL2L1	BMP4	CAB39	CALB1	CAPN1	CCRL2	CDH1	CFTR	CLCN2	CLOCK	CLTB	COASY	COL17A1	COL9A2	CPT1A	CRABP2	CTNND1	CYP2D6	CYP2S1	CYP3A5	DERL3	EFNB1	EFNB2	EPHA2	ERBB2	ESRRA	EXOC1	EZR	FABP1	FANCF	FTH1	GATA3	GATA6	GDA	GOSR1	HMGCS2
TW37_md2	module_2	ADCY6	AGPAT2	AHR	ALOX5	B3GNT7	B3GNT8	BCAP31	BTC	CAMK2G	CASK	CD9	DPP4	DPP7	EFNA1	ENTPD6	ENTPD8	EREG	ETS2	FOS	GALNT12	GALNT5	GCNT3	HPGD	HS3ST1	INPP5D	INSIG2	INSR	ITPK1	ITPKC	LGALS3	MBOAT1	MOGAT3	MUC17	MUC20	MUC5B	MUC6	MYB	NOS3	NOX1	NPSR1	ORMDL3	PEX11A	PEX13	PI4K2B	PLA2G16	PLA2G4D	PLBD1	PLCB3
Temsirolimus	na	ADAR	ANK3	ARHGAP26	ARHGAP45	ARHGEF7	ATP6V1C2	AXIN2	BTC	CDC25A	CFTR	CNOT6	DDX28	DDX31	DDX54	DDX55	DKC1	DNMT3A	DVL1	EIF4A2	EIF4A3	EREG	EZH2	EZR	FOXO4	FZD5	GAR1	GMIP	GTF3C2	HSPD1	IFI30	ILF2	INSR	IRF8	IRS2	ISG20L2	KRAS	LRP5	LSG1	MAML1	MRPL3	MRPL46	MRPL9	MRRF	NAT10	NGDN	NOC4L	NOLC1	NOP14
Thapsigargin	na	ABCB1	ACSL1	ADCY5	ADORA1	ARHGAP20	ARSD	ATP1B1	ATP6V0D1	CRYAB	DGAT2L6	DHCR24	EIF2AK3	GNA14	GNAO1	HSBP1	HSPB8	HTR2A	LFNG	MAN1B1	MAPK3	NAPA	NAT2	NRIP1	SCP2	SLC6A4	SLC9A3R1	SPTLC2	STIM1	SUMF1	TGFB3	TYROBP	VAV3	ZFPM1
Trametinib	na	AHCTF1	ALMS1	ARL3	ASF1A	ASF1B	ATAD5	AURKA	BARD1	BAZ1B	BIRC5	BRD8	CASP6	CBX5	CCNB1	CCNB3	CCNE2	CCNF	CCP110	CDC25C	CDC7	CDCA5	CDCA8	CDK5RAP2	CDKN1B	CENPA	CENPC	CENPE	CENPF	CENPI	CENPJ	CENPL	CENPM	CENPO	CENPQ	CENPU	CEP192	CEP70	CEP78	CEP89	CHTF18	CLSPN	CNOT7	DAXX	DBF4	DCK	DCLRE1B	DCXR	DEK
Trametinib	na	AHCTF1	ALMS1	ARL3	ASF1A	ASF1B	ATAD5	AURKA	BARD1	BAZ1B	BIRC5	BRD8	CASP6	CBX5	CCNB1	CCNB3	CCNE2	CCNF	CCP110	CDC25C	CDC7	CDCA5	CDCA8	CDK5RAP2	CDKN1B	CENPA	CENPC	CENPE	CENPF	CENPI	CENPJ	CENPL	CENPM	CENPO	CENPQ	CENPU	CEP192	CEP70	CEP78	CEP89	CHTF18	CLSPN	CNOT7	DAXX	DBF4	DCK	DCLRE1B	DCXR	DEK
Trametinib_md2	module_2	AGO1	AGO3	ALKBH5	ALYREF	ANAPC7	AR	ARHGAP11A	ARHGAP35	ARHGAP44	ARID4B	ATAD2	BAD	BUB1	CACNA2D2	CALML5	CAMK2B	CAMK2G	CCAR1	CCNA2	CCNE1	CDC20	CDC23	CDC5L	CDK19	CDKN2C	CDT1	CHD3	CHEK1	CHEK2	CKAP5	CLU	CPSF7	CSPG5	CTCF	DDX23	DNAJC8	DROSHA	DTL	EBP	ECT2	ELAVL1	ERCC6L	ESPL1	EZH2	FANCM	FBLN1	FOXM1	FZD2
TubastatinA	na	AMFR	EGFR	ERAP1	IFI35	KDELR3	NFKB1	OAS3	PLAUR	PSMB8	RAB12	SERPINH1	SP100	TAP1	TRADD	TRIP10	YAP1
UNC0638	na	ABCB1	BCO1	CXCL3	CYP2S1	EDN1	EDN2	EGR1	EPHX2	FOS	ID1	IRF3	IRF5	ITPKC	JUNB	LIPF	MYB	NFATC3	NFKBIA	OXER1	PLA2G16	PLBD1	PLCE1	SMAD6
UNC0638.1	na	CEBPD	CHEK2	CLDN1	EGFR	FOS	FZD5	IL4R	JUNB	LAMC2	MLKL	NFKBIA	PARD6B	PSME1	SDC4	TRIP10	VAV3
UNC1215	na	AK2	CCT4	CCT7	CDC25A	CDC37	CDK5R1	CENPH	CHEK2	CSNK1E	DAXX	EIF3D	EIF3G	EIF3H	ELAVL1	FARSA	GART	GATAD2A	GNL3	GSK3B	HDAC2	HSP90AB1	IMPDH2	INTS11	KHSRP	LYAR	MND1	MRPL2	MRPS2	NOC2L	NOP14	NOP2	NT5M	NUDC	NUP153	NUP155	PAICS	PAK1IP1	PFDN2	PFDN6	PHF5A	PIAS4	POLD1	POLR3G	PPAT	PPP1CC	RCC1	RPA2	RPL27
UNC1215	na	AK2	CCT4	CCT7	CDC25A	CDC37	CDK5R1	CENPH	CHEK2	CSNK1E	DAXX	EIF3D	EIF3G	EIF3H	ELAVL1	FARSA	GART	GATAD2A	GNL3	GSK3B	HDAC2	HSP90AB1	IMPDH2	INTS11	KHSRP	LYAR	MND1	MRPL2	MRPS2	NOC2L	NOP14	NOP2	NT5M	NUDC	NUP153	NUP155	PAICS	PAK1IP1	PFDN2	PFDN6	PHF5A	PIAS4	POLD1	POLR3G	PPAT	PPP1CC	RCC1	RPA2	RPL27
UNC1215_md2	module_2	COPE	DCAF1	DCAF16	DOT1L	DTNBP1	EAF1	EIF4EBP1	FDFT1	GGA1	JARID2	KDM2B	MAP2K7	MECR	MED30	MRPS18B	MRPS22	MYO9B	NR2C2AP	PCCB	PIK3R4	RAD23A	SDHB	SREBF2	TAF4B	TIMM44	UBE2R2	UQCRH
VNLG_124	na	AEN	ALAS1	ATIC	ATP5F1E	CDK8	DLST	DUSP6	EFL1	EIF3D	EIF3M	FARSA	GART	GOT1	GTF3A	LYAR	MAPK1	MDH1	MKKS	MRPL52	MRPS5	NOC2L	PDCD11	PFDN2	PHF5A	POLR2F	RPF1	RPIA	RPS6	RRP12	SDHB	SMARCB1	TAF4B	TRAP1	TRMT1	TRMT6	WDR12
VNLG_124	na	AEN	ALAS1	ATIC	ATP5F1E	CDK8	DLST	DUSP6	EFL1	EIF3D	EIF3M	FARSA	GART	GOT1	GTF3A	LYAR	MAPK1	MDH1	MKKS	MRPL52	MRPS5	NOC2L	PDCD11	PFDN2	PHF5A	POLR2F	RPF1	RPIA	RPS6	RRP12	SDHB	SMARCB1	TAF4B	TRAP1	TRMT1	TRMT6	WDR12
VNLG_124_md2	module_2	AHCY	CABIN1	CDC34	DPH3	GGA1	HIRA	PEMT	QPCT	STAMBPL1	STXBP1	UBE2E1
VX-11e	na	ADAMTS1	ADAMTS5	ARHGAP10	AURKA	BIRC5	CCNA2	CDC5L	CDKN3	CENPA	CENPE	CENPI	CENPQ	COL12A1	COL1A2	COL3A1	COL4A1	COL5A1	DAXX	DEK	EFEMP1	EFEMP2	EXT1	FBLN1	FBN1	IGFBP5	ITSN1	KIF20A	KIF23	KIF2C	KIF4A	LOX	MIS18A	NDC80	NEDD1	PLK2	PPP2R3B	PPP2R5D	PRC1	PRKCI	PSMB6	PSMD10	PSMD5	PSMD8	RACGAP1	RING1	SDC2	SERPINE1	SGO2
VX-11e	na	ADAMTS1	ADAMTS5	ARHGAP10	AURKA	BIRC5	CCNA2	CDC5L	CDKN3	CENPA	CENPE	CENPI	CENPQ	COL12A1	COL1A2	COL3A1	COL4A1	COL5A1	DAXX	DEK	EFEMP1	EFEMP2	EXT1	FBLN1	FBN1	IGFBP5	ITSN1	KIF20A	KIF23	KIF2C	KIF4A	LOX	MIS18A	NDC80	NEDD1	PLK2	PPP2R3B	PPP2R5D	PRC1	PRKCI	PSMB6	PSMD10	PSMD5	PSMD8	RACGAP1	RING1	SDC2	SERPINE1	SGO2
VX-11e_md2	module_2	AKR1B10	ASF1A	BAD	BARD1	BLVRA	CBR3	CCL2	CCNB1	CDC20	CEBPD	DIAPH3	DLGAP5	DNMT3B	DZIP1	ELL2	FAAP24	FADS2	FZD2	GJA1	IL13RA1	IL6	IL7R	ING2	KIFC1	LIFR	MAPK9	MATN3	MED20	MYBL1	MYH9	MYL6	MYL9	MYLK	NADK2	NFYB	NIPBL	NNMT	NR3C1	NUP155	ORC3	OSMR	PAPSS2	PFN2	PGM3	PHKB	RAD1	S1PR3	S1PR5
Vinblastine	na	ABCB1	ACADS	ACSL5	ACSL6	ACSM3	ACY3	ADAR	ADCY6	ADRA2C	ALG5	APLP2	ARF1	ARHGAP45	ARRB1	ARSD	ARSE	ASAH1	ASL	ATP6V0A1	AXIN2	BCL2	BCO1	BMP4	BTC	C4BPB	CASK	CERS2	CFTR	CKMT2	CLOCK	CRYL1	CTPS2	CYB5A	CYP2D6	CYP3A5	DAGLA	DOK4	DPAGT1	DPP4	ELOVL7	ENPP3	ENTPD6	ENTPD8	FABP1	FDPS	FGF18	FGFR4	FLAD1
Vinorelbine	na	ABCB1	ABCB4	ACTN4	BCAR1	BIN1	BMP4	DOK4	DPYSL2	EPN1	GFRA1	MAOB	MAPK3	NR1H3	PAPSS2
Vorinostat	na	ABLIM3	ACTA2	ACTN4	ANXA1	ARCN1	CANX	CD151	CTNNA1	EPHA2	FBXW11	FLNA	FN1	GANAB	HLA-B	HLA-DRB5	IGFBP3	ITGA3	ITGB1	ITGB5	LAMB2	MET	MT2A	MYH9	MYO1C	NECAP2	NRP1	PLAUR	POFUT2	RASA1	RHOC	RUNX1	SAR1B	SH3KBP1	SP100	STAM2	STAMBPL1	THBS1	TIMP1	TIMP2	TMED9	TRIO	VEGFA	WDR1	YAP1
Vorinostat	na	ABLIM3	ACTA2	ACTN4	ANXA1	ARCN1	CANX	CD151	CTNNA1	EPHA2	FBXW11	FLNA	FN1	GANAB	HLA-B	HLA-DRB5	IGFBP3	ITGA3	ITGB1	ITGB5	LAMB2	MET	MT2A	MYH9	MYO1C	NECAP2	NRP1	PLAUR	POFUT2	RASA1	RHOC	RUNX1	SAR1B	SH3KBP1	SP100	STAM2	STAMBPL1	THBS1	TIMP1	TIMP2	TMED9	TRIO	VEGFA	WDR1	YAP1
Vorinostat_md2	module_2	ADAM9	ANXA2	APLP2	ARF4	ARSJ	ASPH	ATP6V0E1	B4GALT7	BCL6	BTC	BTN2A1	CAPN2	CAST	CD99	CEP250	CFLAR	CHPF	CHPF2	COL8A1	DDX41	DPAGT1	ERBIN	ETS1	FAS	GALNT10	GNPDA2	GORASP2	HDAC7	HFE	IL13RA1	IL6ST	JUN	LGALS3	LIF	LMAN2	LY96	MED10	MUS81	NDEL1	NECTIN3	NEK7	NMI	NNMT	NT5E	OSMR	PDXK	PICALM	PLK2
WZ3105	na	ABCA1	ABCB1	ABCC4	ABCG2	ACTN1	ADAM12	ADH5	AHCYL1	AMOTL2	APBB1IP	APOL1	ARSB	ARSE	ARSJ	ARSK	BCAR1	BDNF	BNIP3L	C1S	CALD1	CALU	CAPZB	CAV1	CCL2	CD151	CD99	CDH2	CFI	CNEP1R1	COL18A1	COL4A1	COL4A2	COL8A1	CST3	CTGF	CTSB	DERA	DLC1	DOCK11	DUSP1	DUSP3	ERAP1	FERMT2	FLNA	FN1	GCLM	GIT2	GLS
WZ3105	na	ABCA1	ABCB1	ABCC4	ABCG2	ACTN1	ADAM12	ADH5	AHCYL1	AMOTL2	APBB1IP	APOL1	ARSB	ARSE	ARSJ	ARSK	BCAR1	BDNF	BNIP3L	C1S	CALD1	CALU	CAPZB	CAV1	CCL2	CD151	CD99	CDH2	CFI	CNEP1R1	COL18A1	COL4A1	COL4A2	COL8A1	CST3	CTGF	CTSB	DERA	DLC1	DOCK11	DUSP1	DUSP3	ERAP1	FERMT2	FLNA	FN1	GCLM	GIT2	GLS
WZ3105_md2	module_2	ACTB	ADAMTS3	ARPC1B	ARPC5	ATF2	AXL	BMP1	CAP2	CXCL2	CXCL8	DOK4	DPYSL2	DPYSL3	EFEMP2	GALNT2	GFRA1	GNA12	GNAI1	GNB5	GNG11	GNG12	HEXB	IL6	KIRREL1	KIRREL3	LOX	MMP2	MYO1C	NNMT	OXTR	PIK3CD	PRKCA	RDX	S1PR1	SERPINE2	SMAD3	ST3GAL2	TUBB
XAV939	na	AKT1	ARHGEF2	BCL2	CARM1	CDC42	CDK4	CDK5R1	CDKN2D	CEP131	CHD4	CNOT9	CSK	CSNK2A1	DDIT3	DOT1L	E2F6	EIF3G	ELAVL1	ELL	GATAD2A	KDM3A	KHSRP	KMT2C	L3MBTL2	MAPT	MYB	NCBP2	NELFCD	NOP56	NSUN6	OGT	PABPN1	PAN2	PBRM1	PCBP2	PES1	PLCG1	POLDIP3	POLR2F	PPP3R1	PRKAR2A	PRKAR2B	RAE1	RARA	RBM5	RNPS1	RPA2	RPL36
XAV939	na	AKT1	ARHGEF2	BCL2	CARM1	CDC42	CDK4	CDK5R1	CDKN2D	CEP131	CHD4	CNOT9	CSK	CSNK2A1	DDIT3	DOT1L	E2F6	EIF3G	ELAVL1	ELL	GATAD2A	KDM3A	KHSRP	KMT2C	L3MBTL2	MAPT	MYB	NCBP2	NELFCD	NOP56	NSUN6	OGT	PABPN1	PAN2	PBRM1	PCBP2	PES1	PLCG1	POLDIP3	POLR2F	PPP3R1	PRKAR2A	PRKAR2B	RAE1	RARA	RBM5	RNPS1	RPA2	RPL36
XAV939_md2	module_2	ACO2	BCS1L	COX5A	COX5B	ENO2	HK2	IDH3A	NDUFA6	NDUFB11	NDUFB9	NDUFS7	PFKL	SDHB	UQCRC1	UQCRH
XL-880	na	ACAA1	ACO2	ACOT8	ACOX2	ACSL1	ACSS2	AKT1	ALAD	ALDH5A1	ALDH9A1	ALOX15	AP1G1	ARF1	ARRB1	ATP6V0D1	ATP7B	BATF	BRAF	COX6C	CSF3R	CYB5A	CYB5R1	CYP11A1	DHTKD1	DTNBP1	ESR1	ETNK2	FASN	FBP1	FOXO4	GATA2	GFER	GHR	GNMT	GPC5	GREB1	HSD3B1	HYKK	IL20	LDHD	LDLRAP1	LPIN3	LRP2	MAPK9	MCCC1	MMAB	MP68	MTRR
XMD13-2	na	AMOTL2	AURKA	CASP8	CLIP1	DLC1	DUSP3	ICAM1	ITGB1	ITSN1	LATS2	MCFD2	NMT1	PARD6B	PTPN1	RHOF	SEC23A	SPAG9	SRGAP1	SRGN	STAM	TRAPPC1
Y-39983	na	AKT1	ARRB1	CAPN1	CDH1	CYP1A1	DNAJB1	EFNA1	FOS	HSPA2	LAMA5	MAX	NCOA3	PAK4	PRKCD	PRPF6	PXN	RAE1	TINF2
YK4-279	na	ACADS	ACBD3	ADAR	ADCY6	ARF1	ASAH1	ATP6V0A1	BCL2L1	BMP4	CDH1	CDIPT	CERS2	CLOCK	CYTH2	ELOVL7	EXOC6	FZD5	GBA	GORASP2	HNF4G	HPGD	INPP5D	INSR	IRF8	KALRN	MAP3K1	MAPK3	MGST1	NPPA	NSF	ORMDL3	PDPK1	PI4K2B	PIK3AP1	PIK3C2B	PIP5K1B	PLA2G16	PPARGC1A	PTPN6	RAB40B	RGS6	SPTLC2	SRD5A3	STS	TEC	VTI1A
YM155	na	ABCB1	ABCC2	ACSL6	ADH4	AFP	ALDH1A1	AMBP	ANGPTL3	ANGPTL8	APOA1	APOA2	APOB	APOC3	ATP6V1C2	BCO1	C8A	C8G	CREB3L3	CYB5A	CYP2B6	CYP2C9	CYP2S1	CYP3A5	EPHX2	F10	F11	F13B	F5	F7	FABP1	FOXA3	G6PC	HEPH	HNF1A	HNF4A	HNF4G	IDO2	ITIH2	LIPC	MAOB	MOGAT3	MTTP	NR0B2	NR1H3	NR1H4	NR1I2	PROC	RBP2
YM155	na	ABCB1	ABCC2	ACSL6	ADH4	AFP	ALDH1A1	AMBP	ANGPTL3	ANGPTL8	APOA1	APOA2	APOB	APOC3	ATP6V1C2	BCO1	C8A	C8G	CREB3L3	CYB5A	CYP2B6	CYP2C9	CYP2S1	CYP3A5	EPHX2	F10	F11	F13B	F5	F7	FABP1	FOXA3	G6PC	HEPH	HNF1A	HNF4A	HNF4G	IDO2	ITIH2	LIPC	MAOB	MOGAT3	MTTP	NR0B2	NR1H3	NR1H4	NR1I2	PROC	RBP2
YM155_md2	module_2	ACADS	ACOT12	ACY3	ADI1	AGT	AHSG	ALAD	ALB	AXIN2	B3GNT8	BMP4	C4BPA	CFTR	CKMT2	COX4I1	COX5B	CRYL1	DHRS4	DPP4	ETFB	F2	FAHD1	FZD5	GLYCTK	GPER1	HGD	HMGCS2	IDH1	IHH	KNG1	LPAR5	MASP1	MBL2	MUC12	MUC17	NDUFB10	OXER1	PAH	PCK1	PLG	PPARA	PTCH1	RXFP4	SCP2	SERPINF2	SLC26A6	SMAD7	TST
YM201636	na	ACTN1	ADM	ADORA2B	ADRB2	ANXA2	ARHGEF18	CAPN2	CAST	CAV1	CDA	CSF2	DPYD	EGFR	EHD1	EHD2	EPHA2	F3	FHL2	GAS6	GLUD1	GNA15	HRH1	IL15RA	IL1A	IL1B	IL4R	IQGAP1	IRF1	ISG15	ITGA2	ITGA6	JUNB	LAMB3	LAMC2	MET	MMP14	MT2A	NEDD4	NT5E	PARVA	PLAT	PLAU	PLAUR	PXN	RALB	RHOG	RUNX1	SDC4
YM201636	na	ACTN1	ADM	ADORA2B	ADRB2	ANXA2	ARHGEF18	CAPN2	CAST	CAV1	CDA	CSF2	DPYD	EGFR	EHD1	EHD2	EPHA2	F3	FHL2	GAS6	GLUD1	GNA15	HRH1	IL15RA	IL1A	IL1B	IL4R	IQGAP1	IRF1	ISG15	ITGA2	ITGA6	JUNB	LAMB3	LAMC2	MET	MMP14	MT2A	NEDD4	NT5E	PARVA	PLAT	PLAU	PLAUR	PXN	RALB	RHOG	RUNX1	SDC4
YM201636_md2	module_2	CEBPD	CXCL8	DNAJB1	DUSP5	E2F4	E2F7	ECE1	ETS2	FOSL1	GADD45A	GNA12	JUN	MYH9	NDEL1	OPTN	PMAIP1	SLC2A1	SMAD3	TMEM173	TNFAIP3	TNFRSF12A
ZM-447439	na	AKT1S1	ALDOA	DUSP3	GHR	GLUD2	HMGCS1	HSPA1A	MAP3K1	MLH1	RHOBTB2	SF3B4	SORT1	SYCP2	WWP1	YWHAB
ZSTK474	na	ANGPT1	ARHGEF1	ARHGEF2	CSK	DDR2	DNAJC6	DVL2	EDEM1	GADD45A	MAD1L1	MAFG	NDEL1	PRKCE	RTN4	SELENOS	SERPINH1	SHC1	SLC7A11	SOCS5	STAMBPL1	UGGT2
ZSTK474	na	ANGPT1	ARHGEF1	ARHGEF2	CSK	DDR2	DNAJC6	DVL2	EDEM1	GADD45A	MAD1L1	MAFG	NDEL1	PRKCE	RTN4	SELENOS	SERPINH1	SHC1	SLC7A11	SOCS5	STAMBPL1	UGGT2
ZSTK474_md2	module_2	ARPC5	CHSY3	ECM1	FBLIM1	IQGAP1	LAMA1	PARVA	RAB27A	RNF111	SPTBN1	ST3GAL6	TRAPPC1	USP48	VPS53
Zibotentan_ZD4054	na	ABCE1	EIF2S2	EIF3D	EIF3M	NAT10	NOB1	NOP2	PHF5A	POLR1B	POLR1D	POLR2F	RACK1	RIOK1	RPL11	RPL27	RPL35	RPL37	RPL4	RPL5	RPS6	RRP12	RSL24D1	SERBP1	SNRNP40	UPF3B	WDR75	ZNRD1
Zibotentan_ZD4054	na	ABCE1	EIF2S2	EIF3D	EIF3M	NAT10	NOB1	NOP2	PHF5A	POLR1B	POLR1D	POLR2F	RACK1	RIOK1	RPL11	RPL27	RPL35	RPL37	RPL4	RPL5	RPS6	RRP12	RSL24D1	SERBP1	SNRNP40	UPF3B	WDR75	ZNRD1
Zibotentan_ZD4054_md2	module_2	AHCY	ARHGEF7	C1QBP	CHCHD4	CSNK1E	DLL1	E2F4	EAF1	ELP1	GART	GOT1	IDH3A	IPO5	IPO7	ITGA6	KARS	MFN2	MTFMT	MTX2	OGT	OLA1	RAN	SKP2	SLC25A5	TEX10	TSG101	TUBGCP3	TWNK	USP8	XPO5
_5Z_-7-Oxozeaenol	na	AACS	AHCTF1	ANAPC11	ANAPC16	ANAPC7	APLP2	ARHGAP11A	ARHGAP35	ARHGAP44	ARID4A	ARID4B	ASF1A	ATP2A3	B4GALT1	BARD1	BRCC3	CASP6	CCAR1	CCNA2	CCNE2	CCNF	CCNI2	CCT5	CDC25C	CDC6	CDCA5	CDCA8	CDK1	CDKN1B	CDT1	CENPC	CENPE	CENPJ	CEP70	CEP72	CEP76	CHD8	CHEK1	CHTF18	CPE	CPSF7	CTCF	CYP39A1	DNA2	DNMT3B	E2F2	ECT2	EHMT1
_5Z_-7-Oxozeaenol	na	AACS	AHCTF1	ANAPC11	ANAPC16	ANAPC7	APLP2	ARHGAP11A	ARHGAP35	ARHGAP44	ARID4A	ARID4B	ASF1A	ATP2A3	B4GALT1	BARD1	BRCC3	CASP6	CCAR1	CCNA2	CCNE2	CCNF	CCNI2	CCT5	CDC25C	CDC6	CDCA5	CDCA8	CDK1	CDKN1B	CDT1	CENPC	CENPE	CENPJ	CEP70	CEP72	CEP76	CHD8	CHEK1	CHTF18	CPE	CPSF7	CTCF	CYP39A1	DNA2	DNMT3B	E2F2	ECT2	EHMT1
_5Z_-7-Oxozeaenol_md2	module_2	ABCC1	ADAR	AIMP1	AP1G1	AR	BCL2L11	CACNA2D2	CAMK2B	CAMK2G	CASK	CNOT1	CNOT2	CNOT6	CNOT8	CPT1A	CTSV	CWC22	E2F1	EIF3J	EIF4A3	EPRS	FLNB	GATA1	GATA2	GCLM	GFPT1	GNPNAT1	GOT2	GPC1	GUCY1A1	HNF4G	HPSE	IDH1	IFI30	ILF2	IRF6	IRF8	ITGB6	JUN	KLF5	LAMA5	MAD2L1	MAPK3	MAPK9	ME1	MED20	MED29	MED30
piperlongumine	na	ABCC1	ABCC5	ABCG1	ACSL1	ACSL5	ACSL6	ACVR1B	ADH7	AKR1B10	ALDH1A1	ALDH2	ALDH3A1	ATP6V0A1	ATP6V0A2	ATP6V1C2	AXIN2	BAMBI	BCO1	BMP7	COA6	COX5A	COX5B	COX6C	CPT1A	CYC1	CYP2D6	CYP2J2	CYP2S1	CYP3A5	D2HGDH	DOK4	EPHX1	ESRRA	FABP1	FZD10	FZD5	GFPT1	GGT6	GPI	GPX2	GPX3	GPX6	GSR	GSTA1	GSTO2	HNF4A	HNF4G	HSD17B2
piperlongumine	na	ABCC1	ABCC5	ABCG1	ACSL1	ACSL5	ACSL6	ACVR1B	ADH7	AKR1B10	ALDH1A1	ALDH2	ALDH3A1	ATP6V0A1	ATP6V0A2	ATP6V1C2	AXIN2	BAMBI	BCO1	BMP7	COA6	COX5A	COX5B	COX6C	CPT1A	CYC1	CYP2D6	CYP2J2	CYP2S1	CYP3A5	D2HGDH	DOK4	EPHX1	ESRRA	FABP1	FZD10	FZD5	GFPT1	GGT6	GPI	GPX2	GPX3	GPX6	GSR	GSTA1	GSTO2	HNF4A	HNF4G	HSD17B2
piperlongumine_md2	module_2	AACS	ABI1	ACADS	AGPAT2	ALOX15	ALOX5	ANK3	ANO1	ATP2A3	BMP4	CCL17	CCR9	CD79A	CFTR	CLCN2	CLCN3	COASY	CYTH1	DGKE	DGKQ	DHRS4	DMTN	EGF	EXOC6	FGF3	GAK	GAL	GALR2	GOSR1	GRK2	HMGCS2	INSR	IRF8	KRAS	KSR2	LCLAT1	LFNG	LPAR5	MAP2K6	MAPK3	MAX	MBOAT1	MCCC1	MCCC2	MOGAT3	NMU	NOX1	NPSR1
[truncated: 263 more columns]
